# Supplementary material for: Claudin-7 Is Frequently Overexpressed in Ovarian Cancer and Promotes Invasion
Source: PubMed Central journal article supplement (PMC3137611; doi:10.1371/journal.pone.0022119), 2011-07-15
Supplement: pone.0022119.s001.pdf [file pone.0022119.s001.pdf]

**Supp. Table 1: List of ovarian tissue samples used for the study**

| <b>Sample Name</b> | <b>General Classification</b>    | <b>Age</b> | <b>Grade, Stage</b>      |
|--------------------|----------------------------------|------------|--------------------------|
| HOSE B             | Human Ovarian Surface Epithelium | N/A        | N/A                      |
| N 1                | Normal ovary                     | N/A        | N/A                      |
| N 2                | Normal ovary                     | N/A        | N/A                      |
| N 3                | Normal ovary                     | N/A        | N/A                      |
| N 4                | Normal ovary                     | N/A        | N/A                      |
| N 5                | Normal ovary                     | N/A        | N/A                      |
| N 6                | Normal ovary                     | N/A        | N/A                      |
| N 7                | Normal ovary                     | N/A        | N/A                      |
| Tumor 1            | Borderline carcinoma             | 57         | unknown                  |
| Serous 2           | Serous carcinoma low grade       | 55         | Grade 2, stage 3         |
| Serous 3           | Serous carcinoma low grade       | 73         | Grade 2, stage 3         |
| Serous 4           | Serous carcinoma                 | 53         | Stage 4                  |
| Serous 5           | Serous carcinoma                 | 57         | unknown                  |
| Serous 6           | Serous carcinoma                 |            | unknown                  |
| Serous 7           | Serous carcinoma                 | 69         | unknown                  |
| Serous 8           | Serous carcinoma low grade       | 76         | Grade 3c                 |
| Serous 9           | Serous carcinoma high grade      | 74         | Grade 3                  |
| Serous 10          | Serous carcinoma high grade      | 64         | Grade 3                  |
| Serous 11          | Serous carcinoma high grade      | 66         | pT3c Nx Mx, grade 3 of 3 |
| Serous 12          | Serous carcinoma high grade      | 69         | Grade 3c                 |
| Serous 13          | Serous carcinoma high grade      | 48         | Grade 3c                 |
| Serous 14          | Serous carcinoma high grade      | 46         | Grade 3                  |
| Serous 15          | Serous carcinoma high grade      | 86         | Grade 3                  |
| Serous 16          | Serous carcinoma high grade      | 52         | Grade 3c                 |
| Serous 17          | Serous carcinoma high grade      | 64         | unknown                  |
| Serous 18          | Serous carcinoma high grade      | 61         | Grade 3 , stage 3        |
| Serous 19          | Serous carcinoma high grade      | 66         | ovarian CA stage 3       |
| Serous 20          | Serous carcinoma high grade      | 56         | FIGO grade 3 of 3        |
| Serous 21          | Serous carcinoma high grade      | 76         | Grade 3, stage 3         |
| Serous 22          | Serous carcinoma high grade      | 64         | unknown                  |
| Serous 23          | Serous carcinoma high grade      | 71         | primary ovarian          |
| Serous 24          | Serous carcinoma high grade      | 63         | Grade 3                  |
| Serous 25          | Serous carcinoma high grade      | 77         | unknown                  |
| Serous 26          | Serous carcinoma high grade      | 68         | AJCC stage IIIC          |

|           |                             |     |                  |
|-----------|-----------------------------|-----|------------------|
| Serous 27 | Serous carcinoma high grade | 80  | Grade 3          |
| Serous 28 | Serous carcinoma high grade | 64  | Grade 3, stage 4 |
| Serous 29 | Serous carcinoma high grade | 57  | Grade 3, stage 3 |
| Serous 30 | Serous carcinoma high grade | 68  | unknown          |
| Serous 31 | Serous carcinoma high grade | 64  | Grade 4          |
| Serous 32 | Serous carcinoma high grade | 51  | Grade 4          |
| Serous 33 | Serous carcinoma high grade | 64  | T3CNxM1          |
| Serous 34 | Serous carcinoma high grade | N/A | N/A              |
| Serous 35 | Serous carcinoma high grade | N/A | N/A              |
| Serous 36 | Serous carcinoma high grade | 65  | N/A              |
| Serous 37 | Serous carcinoma high grade | 64  | N/A              |
| Serous 38 | Serous carcinoma high grade | 66  | N/A              |
| Serous 39 | Serous carcinoma high grade | 68  | N/A              |
| Serous 40 | Serous carcinoma high grade | 79  | N/A              |
| Serous 41 | Serous carcinoma high grade | 53  | N/A              |
| Serous 42 | Serous carcinoma high grade | N/A | N/A              |
| Serous 43 | Serous carcinoma high grade | N/A | N/A              |
| Serous 44 | Serous cystadenocarcinoma   | 44  | N/A              |
| Serous 45 | Serous carcinoma            | N/A | cDNA panel       |
| Serous 46 | Serous carcinoma            | N/A | N/A              |
| Serous 47 | Serous carcinoma            | N/A | N/A              |
| Serous 48 | Serous carcinoma            | N/A | N/A              |
| Serous 49 | Serous carcinoma            | N/A | N/A              |
| Serous 50 | Serous carcinoma            | N/A | N/A              |
| Serous 51 | Serous carcinoma            | N/A | N/A              |
| Serous 52 | Serous carcinoma            | N/A | N/A              |
| Serous 53 | Serous carcinoma            | N/A | N/A              |
| Serous 54 | Serous carcinoma            | N/A | N/A              |
| Serous 55 | Serous carcinoma            | N/A | N/A              |
| Serous 56 | Serous carcinoma            | N/A | N/A              |
| Serous 57 | Serous carcinoma            | N/A | N/A              |
| Serous 58 | Serous carcinoma            | N/A | N/A              |
| Serous 59 | Serous carcinoma            | N/A | N/A              |
| Serous 60 | Serous carcinoma            | N/A | N/A              |
| Serous 61 | Serous carcinoma            | N/A | N/A              |
| Serous 62 | Serous carcinoma            | N/A | N/A              |
| Serous 63 | Serous carcinoma            | N/A | N/A              |

|           |                                 |     |              |
|-----------|---------------------------------|-----|--------------|
| Serous 64 | Serous carcinoma                | N/A | N/A          |
| Serous 65 | Serous carcinoma                | N/A | N/A          |
| Serous 66 | Serous carcinoma                | N/A | N/A          |
| Clear 1   | Clear cell carcinoma            | N/A | N/A          |
| Clear 2   | Clear cell carcinoma            | N/A | N/A          |
| Clear 3   | Clear cell carcinoma            | N/A | N/A          |
| Clear 4   | Clear cell carcinoma            | N/A | N/A          |
| Clear 5   | Clear cell carcinoma            | N/A | N/A          |
| Clear 6   | Clear cell carcinoma            | N/A | N/A          |
| Clear 7   | Clear cell carcinoma            | N/A | N/A          |
| Clear 8   | Clear cell carcinoma            | N/A | N/A          |
| Clear 9   | Clear cell carcinoma            | 50  | unknown      |
| Clear 10  | Clear cell carcinoma            | 72  | 2 to grade 3 |
| Clear 11  | Clear cell carcinoma            | 70  | N/A          |
| Endo 1    | Endometrium adenocarcinoma high | 77  | N/A          |
| Endo 2    | Endometrium adenocarcinoma high | 41  | N/A          |
| Endo 3    | Endometrium carcinoma           | N/A | N/A          |
| Endo 4    | Endometrium carcinoma           | N/A | N/A          |
| Endo 5    | Endometrium carcinoma           | N/A | N/A          |
| Endo 6    | Endometrium carcinoma           | N/A | N/A          |
| Endo 7    | Endometrium carcinoma           | N/A | N/A          |
| Endo 8    | Endometrium carcinoma           | N/A | N/A          |
| Muc 1     | Mucinous carcinoma              | N/A | N/A          |
| Muc 2     | Mucinous carcinoma              | N/A | N/A          |
| Muc 3     | Mucinous carcinoma              | N/A | N/A          |
| Muc 4     | Mucinous carcinoma              | N/A | N/A          |
