# Supplementary material for: Claudin-7 Is Frequently Overexpressed in Ovarian Cancer and Promotes Invasion
Source: PubMed Central journal article supplement (PMC3137611; doi:10.1371/journal.pone.0022119), 2011-07-15
Supplement: pone.0022119.s002.pdf [file pone.0022119.s002.pdf]

**Supp Table 2: List of significantly altered genes in OVCAR2 and OVCA420**

| <b>Significant gene list in OVCAR2</b> |             |                        |               |                                                                       |
|----------------------------------------|-------------|------------------------|---------------|-----------------------------------------------------------------------|
| <b>Input ID</b>                        | <b>Fold</b> | <b>Gene ID</b>         | <b>Symbol</b> | <b>Name</b>                                                           |
| CCL20                                  | 7.06        | <a href="#">6364</a>   | CCL20         | chemokine (C-C motif) ligand 20                                       |
| CA12                                   | 6.52        | <a href="#">771</a>    | CA12          | carbonic anhydrase XII                                                |
| APLP2                                  | 5.01        | <a href="#">334</a>    | APLP2         | amyloid beta (A4) precursor-like protein 2                            |
| APOE                                   | 4.02        | <a href="#">348</a>    | APOE          | apolipoprotein E                                                      |
| HRASLS3                                | 3.93        | <a href="#">11145</a>  | HRASLS3       | HRAS-like suppressor 3                                                |
| PANX2                                  | 3.89        | <a href="#">56666</a>  | PANX2         | pannexin 2                                                            |
| TEAD2                                  | 3.73        | <a href="#">8463</a>   | TEAD2         | TEA domain family member 2                                            |
| MX1                                    | 3.28        | <a href="#">4599</a>   | MX1           | myxovirus resistance 1, interferon-inducible protein p78              |
| IFI44                                  | 3.25        | <a href="#">10561</a>  | IFI44         | interferon-induced protein 44                                         |
| CREB3L2                                | 3.19        | <a href="#">64764</a>  | CREB3L2       | cAMP responsive element binding protein 3-like 2                      |
| SERP1                                  | 3.19        | <a href="#">27230</a>  | SERP1         | stress-associated endoplasmic reticulum protein 1                     |
| KIAA0152                               | 3.16        | <a href="#">9761</a>   | KIAA0152      | KIAA0152                                                              |
| TMCO1                                  | 3.10        | <a href="#">54499</a>  | TMCO1         | transmembrane and coiled-coil domains 1                               |
| PRSS8                                  | 3.07        | <a href="#">5652</a>   | PRSS8         | protease, serine, 8 (prostasin)                                       |
| WIPI1                                  | 3.02        | <a href="#">55062</a>  | WIPI1         | WD repeat domain, phosphoinositide interacting 1                      |
| PRIC285                                | 2.87        | <a href="#">85441</a>  | PRIC285       | peroxisomal proliferator-activated receptor A interacting complex 285 |
| SLCO2A1                                | 2.85        | <a href="#">6578</a>   | SLCO2A1       | solute carrier organic anion transporter family, member 2A1           |
| G1P3                                   | 2.82        | <a href="#">2537</a>   | G1P3          | interferon, alpha-inducible protein 6                                 |
| SOSTDC1                                | 2.75        | <a href="#">25928</a>  | SOSTDC1       | sclerostin domain containing 1                                        |
| SLC35B1                                | 2.73        | <a href="#">10237</a>  | SLC35B1       | solute carrier family 35, member B1                                   |
| PRKCZ                                  | 2.71        | <a href="#">5590</a>   | PRKCZ         | protein kinase C, zeta                                                |
| IGFBP7                                 | 2.70        | <a href="#">3490</a>   | IGFBP7        | insulin-like growth factor binding protein 7                          |
| DAZAP2                                 | 2.69        | <a href="#">9802</a>   | DAZAP2        | DAZ associated protein 2                                              |
| BID                                    | 2.68        | <a href="#">637</a>    | BID           | BH3 interacting domain death agonist                                  |
| HLA B                                  | 2.68        | <a href="#">3106</a>   | HLA B         | major histocompatibility complex, class I, B                          |
| CX3CL1                                 | 2.65        | <a href="#">6376</a>   | CX3CL1        | chemokine (C-X3-C motif) ligand 1                                     |
| FZD2                                   | 2.64        | <a href="#">2535</a>   | FZD2          | frizzled homolog 2 (Drosophila)                                       |
| DNAJB6                                 | 2.63        | <a href="#">10049</a>  | DNAJB6        | DnaJ (Hsp40) homolog, subfamily B, member 6                           |
| LYSMD2                                 | 2.61        | <a href="#">256586</a> | LYSMD2        | LysM, putative peptidoglycan-binding, domain containing 2             |
| MAGED1                                 | 2.57        | <a href="#">9500</a>   | MAGED1        | melanoma antigen family D, 1                                          |
| C3                                     | 2.55        | <a href="#">718</a>    | C3            | complement component 3                                                |
| FOXQ1                                  | 2.55        | <a href="#">94234</a>  | FOXQ1         | forkhead box Q1                                                       |
| NCOA7                                  | 2.55        | <a href="#">135112</a> | NCOA7         | nuclear receptor coactivator 7                                        |
| ZNF544                                 | 2.55        | <a href="#">27300</a>  | ZNF544        | zinc finger protein 544                                               |
| TIMP2                                  | 2.54        | <a href="#">7077</a>   | TIMP2         | TIMP metalloproteinase inhibitor 2                                    |
| GPT2                                   | 2.50        | <a href="#">84706</a>  | GPT2          | glutamic pyruvate transaminase (alanine aminotransferase) 2           |
| ITPR3                                  | 2.48        | <a href="#">3710</a>   | ITPR3         | inositol 1,4,5-triphosphate receptor, type 3                          |
| SET                                    | 2.47        | <a href="#">6418</a>   | SET           | SET translocation (myeloid leukemia-associated)                       |
| ABLIM1                                 | 2.46        | <a href="#">3983</a>   | ABLIM1        | actin binding LIM protein 1                                           |
| TTYH3                                  | 2.46        | <a href="#">80727</a>  | TTYH3         | tweety homolog 3 (Drosophila)                                         |
| ZDHHC14                                | 2.46        | <a href="#">79683</a>  | ZDHHC14       | zinc finger, DHHC-type containing 14                                  |
| CYBRD1                                 | 2.45        | <a href="#">79901</a>  | CYBRD1        | cytochrome b reductase 1                                              |

|           |      |                        |            |                                                                    |
|-----------|------|------------------------|------------|--------------------------------------------------------------------|
| UBE2L6    | 2.45 | <a href="#">9246</a>   | UBE2L6     | ubiquitin-conjugating enzyme E2L 6                                 |
| ZCCHC14   | 2.45 | <a href="#">23174</a>  | ZCCHC14    | zinc finger, CCHC domain containing 14                             |
| SURF4     | 2.43 | <a href="#">6836</a>   | SURF4      | surfeit 4                                                          |
| NUDT21    | 2.42 | <a href="#">11051</a>  | NUDT21     | nudix (nucleoside diphosphate linked moiety X)-type motif 21       |
| PDIA4     | 2.42 | <a href="#">9601</a>   | PDIA4      | protein disulfide isomerase family A, member 4                     |
| CDH3      | 2.39 | <a href="#">1001</a>   | CDH3       | cadherin 3, type 1, P-cadherin (placental)                         |
| FGFR3     | 2.39 | <a href="#">2261</a>   | FGFR3      | dwarfism)                                                          |
| PIK3R2    | 2.39 | <a href="#">5296</a>   | PIK3R2     | phosphoinositide-3-kinase, regulatory subunit 2 (p85 beta)         |
| WDR40A    | 2.39 | <a href="#">25853</a>  | WDR40A     | WD repeat domain 40A                                               |
| FADS1     | 2.37 | <a href="#">3992</a>   | FADS1      | fatty acid desaturase 1                                            |
| CXCL1     | 2.36 | <a href="#">2919</a>   | CXCL1      | activity, alpha)                                                   |
| DDIT4     | 2.36 | <a href="#">54541</a>  | DDIT4      | DNA-damage-inducible transcript 4                                  |
| IL8       | 2.36 | <a href="#">3576</a>   | IL8        | interleukin 8                                                      |
| RKHD1     | 2.36 | <a href="#">399664</a> | RKHD1      | ring finger and KH domain containing 1                             |
| TRPC6     | 2.35 | <a href="#">7225</a>   | TRPC6      | transient receptor potential cation channel, subfamily C, member 6 |
| IMPA2     | 2.33 | <a href="#">3613</a>   | IMPA2      | inositol(myo)-1(or 4)-monophosphatase 2                            |
| PCSK1N    | 2.33 | <a href="#">27344</a>  | PCSK1N     | proprotein convertase subtilisin/kexin type 1 inhibitor            |
| C20ORF160 | 2.32 | <a href="#">140706</a> | C20ORF160  | chromosome 20 open reading frame 160                               |
| PPIA      | 2.31 | <a href="#">5478</a>   | PPIA       | peptidylprolyl isomerase A (cyclophilin A)                         |
| C1        | 2.31 | <a href="#">55808</a>  | ST6GALNAC1 | acetylgalactosaminide alpha-2,6-sialyltransferase 1                |
| CYFIP2    | 2.29 | <a href="#">26999</a>  | CYFIP2     | cytoplasmic FMR1 interacting protein 2                             |
| LRP10     | 2.28 | <a href="#">26020</a>  | LRP10      | low density lipoprotein receptor-related protein 10                |
| HMGCS1    | 2.27 | <a href="#">3157</a>   | HMGCS1     | 3-hydroxy-3-methylglutaryl-Coenzyme A synthase 1 (soluble)         |
| CXADR     | 2.27 | <a href="#">1525</a>   | CXADR      | coxsackie virus and adenovirus receptor                            |
| DNM1L     | 2.27 | <a href="#">10059</a>  | DNM1L      | dynamamin 1-like                                                   |
| RAF1      | 2.27 | <a href="#">5894</a>   | RAF1       | v-raf-1 murine leukemia viral oncogene homolog 1                   |
| FUCA1     | 2.26 | <a href="#">2517</a>   | FUCA1      | fucosidase, alpha-L- 1, tissue                                     |
| LTB       | 2.26 | <a href="#">4050</a>   | LTB        | lymphotoxin beta (TNF superfamily, member 3)                       |
| HOXA5     | 2.25 | <a href="#">3202</a>   | HOXA5      | homeobox A5                                                        |
| TRIM8     | 2.25 | <a href="#">81603</a>  | TRIM8      | tripartite motif-containing 8                                      |
| SCHIP1    | 2.22 | <a href="#">29970</a>  | SCHIP1     | schwannomin interacting protein 1                                  |
| IFI16     | 2.21 | <a href="#">3428</a>   | IFI16      | interferon, gamma-inducible protein 16                             |
| FYCO1     | 2.20 | <a href="#">79443</a>  | FYCO1      | FYVE and coiled-coil domain containing 1                           |
| MRPL36    | 2.20 | <a href="#">64979</a>  | MRPL36     | mitochondrial ribosomal protein L36                                |
| TUBB2B    | 2.20 | <a href="#">347733</a> | TUBB2B     | tubulin, beta 2B                                                   |
| C17ORF59  | 2.19 | <a href="#">54785</a>  | C17ORF59   | chromosome 17 open reading frame 59                                |
| IER3      | 2.19 | <a href="#">8870</a>   | IER3       | immediate early response 3                                         |
| A01247    | 2.19 | <a href="#">22998</a>  | LIMCH1     | LIM and calponin homology domains-containing protein 1             |
| CARD9     | 2.18 | <a href="#">64170</a>  | CARD9      | caspase recruitment domain family, member 9                        |
| MAP1LC3B  | 2.18 | <a href="#">81631</a>  | MAP1LC3B   | microtubule-associated protein 1 light chain 3 beta                |
| MFGE8     | 2.17 | <a href="#">4240</a>   | MFGE8      | milk fat globule-EGF factor 8 protein                              |
| C5ORF13   | 2.16 | <a href="#">9315</a>   | C5ORF13    | chromosome 5 open reading frame 13                                 |
| LOC152485 | 2.16 | <a href="#">152485</a> | ZNF827     | zinc finger protein 827                                            |
| DSCR1     | 2.15 | <a href="#">1827</a>   | DSCR1      | Down syndrome critical region gene 1                               |
| TSPAN13   | 2.15 | <a href="#">27075</a>  | TSPAN13    | tetraspanin 13                                                     |
| SCARB2    | 2.14 | <a href="#">950</a>    | SCARB2     | scavenger receptor class B, member 2                               |

|          |      |                        |          |                                                                         |
|----------|------|------------------------|----------|-------------------------------------------------------------------------|
| STARD10  | 2.14 | <a href="#">10809</a>  | STARD10  | START domain containing 10                                              |
| ATP6AP1  | 2.12 | <a href="#">537</a>    | ATP6AP1  | ATPase, H <sup>+</sup> transporting, lysosomal accessory protein 1      |
| SLC29A4  | 2.12 | <a href="#">222962</a> | SLC29A4  | solute carrier family 29 (nucleoside transporters), member 4            |
| SLC37A1  | 2.11 | <a href="#">54020</a>  | SLC37A1  | solute carrier family 37 (glycerol-3-phosphate transporter), member 1   |
| SLC39A6  | 2.10 | <a href="#">25800</a>  | SLC39A6  | solute carrier family 39 (zinc transporter), member 6                   |
| DKK1     | 2.09 | <a href="#">22943</a>  | DKK1     | dickkopf homolog 1 ( <i>Xenopus laevis</i> )                            |
| HLA A    | 2.09 | <a href="#">3105</a>   | HLA A    | major histocompatibility complex, class I, A                            |
| ACSL4    | 2.08 | <a href="#">2182</a>   | ACSL4    | acyl-CoA synthetase long-chain family member 4                          |
| DYNLL2   | 2.08 | <a href="#">140735</a> | DYNLL2   | dynein, light chain, LC8-type 2                                         |
| FBXO21   | 2.07 | <a href="#">23014</a>  | FBXO21   | F-box protein 21                                                        |
| FSCN1    | 2.06 | <a href="#">6624</a>   | FSCN1    | purpuratus)                                                             |
| IERSL    | 2.06 | <a href="#">389792</a> | IERSL    | immediate early response 5-like                                         |
| COL18A1  | 2.04 | <a href="#">80781</a>  | COL18A1  | collagen, type XVIII, alpha 1                                           |
| JARID1B  | 2.04 | <a href="#">10765</a>  | JARID1B  | jumonji, AT rich interactive domain 1B                                  |
| ST3GAL5  | 2.04 | <a href="#">8869</a>   | ST3GAL5  | ST3 beta-galactoside alpha-2,3-sialyltransferase 5                      |
| TNFSF10  | 2.04 | <a href="#">8743</a>   | TNFSF10  | tumor necrosis factor (ligand) superfamily, member 10                   |
| COPB2    | 2.03 | <a href="#">9276</a>   | COPB2    | coatamer protein complex, subunit beta 2 (beta prime)                   |
| PAPSS2   | 2.02 | <a href="#">9060</a>   | PAPSS2   | 3'-phosphoadenosine 5'-phosphosulfate synthase 2                        |
| CDK2AP1  | 2.02 | <a href="#">8099</a>   | CDK2AP1  | CDK2-associated protein 1                                               |
| DHRS3    | 2.02 | <a href="#">9249</a>   | DHRS3    | dehydrogenase/reductase (SDR family) member 3                           |
| PAQR8    | 2.02 | <a href="#">85315</a>  | PAQR8    | progesterin and adipoQ receptor family member VIII                      |
| TMEM125  | 2.02 | <a href="#">128218</a> | TMEM125  | transmembrane protein 125                                               |
| PIK4CA   | 2.01 | <a href="#">5297</a>   | PIK4CA   | phosphatidylinositol 4-kinase, catalytic, alpha polypeptide             |
| IMPAD1   | 2.00 | <a href="#">54928</a>  | IMPAD1   | inositol monophosphatase domain containing 1                            |
| MAN2B2   | 2.00 | <a href="#">23324</a>  | MAN2B2   | mannosidase, alpha, class 2B, member 2                                  |
| FAM38A   | 1.99 | <a href="#">9780</a>   | FAM38A   | family with sequence similarity 38, member A                            |
| MXD4     | 1.99 | <a href="#">10608</a>  | MXD4     | MAX dimerization protein 4                                              |
| MLLT11   | 1.99 | <a href="#">10962</a>  | MLLT11   | <i>Drosophila</i> ); translocated to, 11                                |
| RRAS     | 1.99 | <a href="#">6237</a>   | RRAS     | related RAS viral (r-ras) oncogene homolog                              |
| TJP3     | 1.99 | <a href="#">27134</a>  | TJP3     | tight junction protein 3 (zona occludens 3)                             |
| CDC25B   | 1.98 | <a href="#">994</a>    | CDC25B   | cell division cycle 25B                                                 |
| CREG1    | 1.98 | <a href="#">8804</a>   | CREG1    | cellular repressor of E1A-stimulated genes 1                            |
| EPSTI1   | 1.97 | <a href="#">94240</a>  | EPSTI1   | epithelial stromal interaction 1 (breast)                               |
| PGBD5    | 1.97 | <a href="#">79605</a>  | PGBD5    | piggyBac transposable element derived 5                                 |
| RAB15    | 1.97 | <a href="#">376267</a> | RAB15    | RAB15, member RAS oncogene family                                       |
| VANGL2   | 1.97 | <a href="#">57216</a>  | VANGL2   | vang-like 2 (van gogh, <i>Drosophila</i> )                              |
| FUT4     | 1.96 | <a href="#">2526</a>   | FUT4     | fucosyltransferase 4 (alpha (1,3) fucosyltransferase, myeloid-specific) |
| LPIN1    | 1.96 | <a href="#">23175</a>  | LPIN1    | lipin 1                                                                 |
| MAP2K1   | 1.96 | <a href="#">5604</a>   | MAP2K1   | mitogen-activated protein kinase kinase 1                               |
| CEBPB    | 1.95 | <a href="#">1051</a>   | CEBPB    | CCAAT/enhancer binding protein (C/EBP), beta                            |
| KIF1A    | 1.95 | <a href="#">547</a>    | KIF1A    | kinesin family member 1A                                                |
| C6ORF85  | 1.95 | <a href="#">63027</a>  | SLC22A23 | solute carrier family 22, member 23                                     |
| RNF149   | 1.94 | <a href="#">284996</a> | RNF149   | ring finger protein 149                                                 |
| CHFR     | 1.93 | <a href="#">55743</a>  | CHFR     | checkpoint with forkhead and ring finger domains                        |
| MGC13057 | 1.93 | <a href="#">84281</a>  | C2ORF88  | chromosome 2 open reading frame 88                                      |
| EIF2AK2  | 1.93 | <a href="#">5610</a>   | EIF2AK2  | eukaryotic translation initiation factor 2-alpha kinase 2               |

|           |      |                        |          |                                                                        |
|-----------|------|------------------------|----------|------------------------------------------------------------------------|
| TRIM5     | 1.93 | <a href="#">85363</a>  | TRIM5    | tripartite motif-containing 5                                          |
| NLF2      | 1.92 | <a href="#">388125</a> | C2CD4B   | C2 calcium-dependent domain containing 4B                              |
| CEBPD     | 1.92 | <a href="#">1052</a>   | CEBPD    | CCAAT/enhancer binding protein (C/EBP), delta                          |
| IFITM3    | 1.92 | <a href="#">10410</a>  | IFITM3   | interferon induced transmembrane protein 3 (1-8U)                      |
| MMP1      | 1.92 | <a href="#">4312</a>   | MMP1     | matrix metalloproteinase 1 (interstitial collagenase)                  |
| LOC339344 | 1.92 | <a href="#">339344</a> | MYPOP    | Myb-related transcription factor, partner of profilin                  |
| TFAP2A    | 1.92 | <a href="#">7020</a>   | TFAP2A   | alpha)                                                                 |
| ABR       | 1.91 | <a href="#">29</a>     | ABR      | active BCR-related gene                                                |
| ARID1A    | 1.91 | <a href="#">8289</a>   | ARID1A   | AT rich interactive domain 1A (SWI- like)                              |
| HSPA1A    | 1.91 | <a href="#">3303</a>   | HSPA1A   | heat shock 70kDa protein 1A                                            |
| NR1H2     | 1.91 | <a href="#">7376</a>   | NR1H2    | nuclear receptor subfamily 1, group H, member 2                        |
| TM9SF4    | 1.91 | <a href="#">9777</a>   | TM9SF4   | transmembrane 9 superfamily protein member 4                           |
| CXCL6     | 1.90 | <a href="#">6372</a>   | CXCL6    | chemokine (C-X-C motif) ligand 6 (granulocyte chemotactic protein 2)   |
| GNAI2     | 1.90 | <a href="#">2771</a>   | GNAI2    | polypeptide 2                                                          |
| PODXL2    | 1.90 | <a href="#">50512</a>  | PODXL2   | podocalyxin-like 2                                                     |
| ALKBH7    | 1.89 | <a href="#">84266</a>  | ALKBH7   | alkB, alkylation repair homolog 7 (E. coli)                            |
| PJA2      | 1.89 | <a href="#">9867</a>   | PJA2     | praja 2, RING-H2 motif containing                                      |
| VPS39     | 1.89 | <a href="#">23339</a>  | VPS39    | vacuolar protein sorting 39 (yeast)                                    |
| 2123      | 1.89 | <a href="#">83637</a>  | ZMIZ2    | zinc finger, MIZ-type containing 2                                     |
| FLJ22471  | 1.88 | <a href="#">80212</a>  | CCDC92   | coiled-coil domain containing 92                                       |
| EXTL3     | 1.88 | <a href="#">2137</a>   | EXTL3    | exostoses (multiple)-like 3                                            |
| GDF15     | 1.88 | <a href="#">9518</a>   | GDF15    | growth differentiation factor 15                                       |
| IGF2R     | 1.88 | <a href="#">3482</a>   | IGF2R    | insulin-like growth factor 2 receptor                                  |
| FLJ25476  | 1.88 | <a href="#">149076</a> | ZNF362   | zinc finger protein 362                                                |
| CLTC      | 1.87 | <a href="#">1213</a>   | CLTC     | clathrin, heavy chain (Hc)                                             |
| MAPK6     | 1.87 | <a href="#">5597</a>   | MAPK6    | mitogen-activated protein kinase 6                                     |
| RAPGEF1   | 1.87 | <a href="#">2889</a>   | RAPGEF1  | Rap guanine nucleotide exchange factor (GEF) 1                         |
| ABHD8     | 1.86 | <a href="#">79575</a>  | ABHD8    | abhydrolase domain containing 8                                        |
| ARL6IP5   | 1.86 | <a href="#">10550</a>  | ARL6IP5  | ADP-ribosylation-like factor 6 interacting protein 5                   |
| CXCL2     | 1.86 | <a href="#">2920</a>   | CXCL2    | chemokine (C-X-C motif) ligand 2                                       |
| CGN       | 1.86 | <a href="#">57530</a>  | CGN      | cingulin                                                               |
| HSPA1B    | 1.86 | <a href="#">3304</a>   | HSPA1B   | heat shock 70kDa protein 1B                                            |
| ID1       | 1.86 | <a href="#">3397</a>   | ID1      | inhibitor of DNA binding 1, dominant negative helix-loop-helix protein |
| UBE2D3    | 1.86 | <a href="#">7323</a>   | UBE2D3   | ubiquitin-conjugating enzyme E2D 3 (UBC4/5 homolog, yeast)             |
| PRKD2     | 1.85 | <a href="#">25865</a>  | PRKD2    | protein kinase D2                                                      |
| RUTBC1    | 1.85 | <a href="#">9905</a>   | RUTBC1   | RUN and TBC1 domain containing 1                                       |
| SH3GL3    | 1.85 | <a href="#">6457</a>   | SH3GL3   | SH3-domain GRB2-like 3                                                 |
| SLC25A22  | 1.85 | <a href="#">79751</a>  | SLC25A22 | solute carrier family 25 (mitochondrial carrier: glutamate), member 22 |
| FCGRT     | 1.84 | <a href="#">2217</a>   | FCGRT    | Fc fragment of IgG, receptor, transporter, alpha                       |
| FBLN1     | 1.84 | <a href="#">2192</a>   | FBLN1    | fibulin 1                                                              |
| ORF1      | 1.84 | <a href="#">55354</a>  | ORF1     | hypothetical protein, clone pT-Adv JuaX22                              |
| NFIL3     | 1.84 | <a href="#">4783</a>   | NFIL3    | nuclear factor, interleukin 3 regulated                                |
| TNFAIP2   | 1.84 | <a href="#">7127</a>   | TNFAIP2  | tumor necrosis factor, alpha-induced protein 2                         |
| LMBR1L    | 1.83 | <a href="#">55716</a>  | LMBR1L   | limb region 1 homolog (mouse)-like                                     |
| SASH1     | 1.83 | <a href="#">23328</a>  | SASH1    | SAM and SH3 domain containing 1                                        |
| UBE2F     | 1.83 | <a href="#">140739</a> | UBE2F    | ubiquitin-conjugating enzyme E2F (putative)                            |

|          |      |                        |          |                                                              |
|----------|------|------------------------|----------|--------------------------------------------------------------|
| ARPC1A   | 1.82 | <a href="#">10552</a>  | ARPC1A   | actin related protein 2/3 complex, subunit 1A, 41kDa         |
| HOXA2    | 1.82 | <a href="#">3199</a>   | HOXA2    | homeobox A2                                                  |
| IGFBP3   | 1.82 | <a href="#">3486</a>   | IGFBP3   | insulin-like growth factor binding protein 3                 |
| IFI35    | 1.82 | <a href="#">3430</a>   | IFI35    | interferon-induced protein 35                                |
| MLLT6    | 1.82 | <a href="#">4302</a>   | MLLT6    | Drosophila); translocated to, 6                              |
| PLXNB1   | 1.82 | <a href="#">5364</a>   | PLXNB1   | plexin B1                                                    |
| PVRL2    | 1.82 | <a href="#">5819</a>   | PVRL2    | poliovirus receptor-related 2 (herpesvirus entry mediator B) |
| P4HB     | 1.82 | <a href="#">5034</a>   | P4HB     | hydroxylase), beta polypeptide                               |
| RRAGA    | 1.82 | <a href="#">10670</a>  | RRAGA    | Ras-related GTP binding A                                    |
| PLEKHH3  | 1.81 | <a href="#">79990</a>  | PLEKHH3  | domain) member 3                                             |
| SMARCA4  | 1.81 | <a href="#">6597</a>   | SMARCA4  | chromatin, subfamily a, member 4                             |
| ARFGAP3  | 1.80 | <a href="#">26286</a>  | ARFGAP3  | ADP-ribosylation factor GTPase activating protein 3          |
| C17ORF63 | 1.80 | <a href="#">55731</a>  | C17ORF63 | chromosome 17 open reading frame 63                          |
| GFPT1    | 1.80 | <a href="#">2673</a>   | GFPT1    | glutamine-fructose-6-phosphate transaminase 1                |
| IFITM2   | 1.80 | <a href="#">10581</a>  | IFITM2   | interferon induced transmembrane protein 2 (1-8D)            |
| HLA C    | 1.80 | <a href="#">3107</a>   | HLA C    | major histocompatibility complex, class I, C                 |
| MET      | 1.80 | <a href="#">4233</a>   | MET      | met proto-oncogene (hepatocyte growth factor receptor)       |
| MYH10    | 1.80 | <a href="#">4628</a>   | MYH10    | myosin, heavy chain 10, non-muscle                           |
| PPFIBP2  | 1.80 | <a href="#">8495</a>   | PPFIBP2  | PTPRF interacting protein, binding protein 2 (liprin beta 2) |
| ANAPC1   | 1.79 | <a href="#">64682</a>  | ANAPC1   | anaphase promoting complex subunit 1                         |
| CEACAM1  | 1.79 | <a href="#">634</a>    | CEACAM1  | glycoprotein)                                                |
| DDR1     | 1.79 | <a href="#">780</a>    | DDR1     | discoidin domain receptor family, member 1                   |
| NMD3     | 1.79 | <a href="#">51068</a>  | NMD3     | NMD3 homolog ( <i>S. cerevisiae</i> )                        |
| RPS6KB1  | 1.79 | <a href="#">6198</a>   | RPS6KB1  | ribosomal protein S6 kinase, 70kDa, polypeptide 1            |
| FLJ31951 | 1.79 | <a href="#">153830</a> | RNF145   | ring finger protein 145                                      |
| ADAR     | 1.78 | <a href="#">103</a>    | ADAR     | adenosine deaminase, RNA-specific                            |
| CAB39    | 1.78 | <a href="#">51719</a>  | CAB39    | calcium binding protein 39                                   |
| GBA      | 1.78 | <a href="#">2629</a>   | GBA      | glucosidase, beta; acid (includes glucosylceramidase)        |
| HERC5    | 1.78 | <a href="#">51191</a>  | HERC5    | hect domain and RLD 5                                        |
| RDH10    | 1.78 | <a href="#">157506</a> | RDH10    | retinol dehydrogenase 10 (all-trans)                         |
| PTPNS1   | 1.78 | <a href="#">140885</a> | SIRPA    | signal-regulatory protein alpha                              |
| SFXN3    | 1.77 | <a href="#">81855</a>  | SFXN3    | sideroflexin 3                                               |
| TMC6     | 1.77 | <a href="#">11322</a>  | TMC6     | transmembrane channel-like 6                                 |
| IFITM1   | 1.76 | <a href="#">8519</a>   | IFITM1   | interferon induced transmembrane protein 1 (9-27)            |
| LPHN1    | 1.76 | <a href="#">22859</a>  | LPHN1    | latrophilin 1                                                |
| ROD1     | 1.76 | <a href="#">9991</a>   | ROD1     | ROD1 regulator of differentiation 1 ( <i>S. pombe</i> )      |
| SEPN1    | 1.76 | <a href="#">57190</a>  | SEPN1    | selenoprotein N, 1                                           |
| TMEM47   | 1.76 | <a href="#">83604</a>  | TMEM47   | transmembrane protein 47                                     |
| C20ORF22 | 1.75 | <a href="#">26090</a>  | ABHD12   | abhydrolase domain containing 12                             |
| BTG3     | 1.75 | <a href="#">10950</a>  | BTG3     | BTG family, member 3                                         |
| MGC24665 | 1.75 | <a href="#">116028</a> | C16orf75 | chromosome 16 open reading frame 75                          |
| CYB5R3   | 1.75 | <a href="#">1727</a>   | CYB5R3   | cytochrome b5 reductase 3                                    |
| IL4I1    | 1.75 | <a href="#">259307</a> | IL4I1    | interleukin 4 induced 1                                      |
| IQWD1    | 1.75 | <a href="#">55827</a>  | IQWD1    | IQ motif and WD repeats 1                                    |
| NAGLU    | 1.75 | <a href="#">4669</a>   | NAGLU    | N-acetylglucosaminidase, alpha- (Sanfilippo disease IIIB)    |
| PARP10   | 1.75 | <a href="#">84875</a>  | PARP10   | poly (ADP-ribose) polymerase family, member 10               |

|          |      |                        |          |                                                                  |
|----------|------|------------------------|----------|------------------------------------------------------------------|
| RAN      | 1.75 | <a href="#">5901</a>   | RAN      | RAN, member RAS oncogene family                                  |
| 2-Sep    | 1.75 | <a href="#">4735</a>   | 2-Sep    | septin 2                                                         |
| SNX27    | 1.75 | <a href="#">81609</a>  | SNX27    | sorting nexin family member 27                                   |
| TNF      | 1.75 | <a href="#">7124</a>   | TNF      | tumor necrosis factor (TNF superfamily, member 2)                |
| CPVL     | 1.74 | <a href="#">54504</a>  | CPVL     | carboxypeptidase, vitellogenic-like                              |
| CDS2     | 1.74 | <a href="#">8760</a>   | CDS2     | CDP-diacylglycerol synthase (phosphatidate cytidyltransferase) 2 |
| CCNG1    | 1.74 | <a href="#">900</a>    | CCNG1    | cyclin G1                                                        |
| DBN1     | 1.74 | <a href="#">1627</a>   | DBN1     | drebrin 1                                                        |
| FLOT2    | 1.74 | <a href="#">2319</a>   | FLOT2    | flotillin 2                                                      |
| KIAA0195 | 1.74 | <a href="#">9772</a>   | KIAA0195 | KIAA0195                                                         |
| LAMB2    | 1.74 | <a href="#">3913</a>   | LAMB2    | laminin, beta 2 (laminin S)                                      |
| LEPREL2  | 1.74 | <a href="#">10536</a>  | LEPREL2  | leprecan-like 2                                                  |
| SEC61A1  | 1.74 | <a href="#">29927</a>  | SEC61A1  | Sec61 alpha 1 subunit ( <i>S. cerevisiae</i> )                   |
| SRP46    | 1.74 | <a href="#">10929</a>  | SFRS2B   | splicing factor, arginine/serine-rich 2B                         |
| TEGT     | 1.74 | <a href="#">7009</a>   | TEGT     | testis enhanced gene transcript (BAX inhibitor 1)                |
| ZNF358   | 1.74 | <a href="#">140467</a> | ZNF358   | zinc finger protein 358                                          |
| ADD3     | 1.73 | <a href="#">120</a>    | ADD3     | adducin 3 (gamma)                                                |
| MGC12981 | 1.73 | <a href="#">84317</a>  | CCDC115  | coiled-coil domain containing 115                                |
| FAM32A   | 1.73 | <a href="#">26017</a>  | FAM32A   | family with sequence similarity 32, member A                     |
| HPRT1    | 1.73 | <a href="#">3251</a>   | HPRT1    | hypoxanthine phosphoribosyltransferase 1 (Lesch-Nyhan syndrome)  |
| NOP5     | 1.73 | <a href="#">51602</a>  | NOP58    | NOP58 ribonucleoprotein homolog (yeast)                          |
| PIGQ     | 1.73 | <a href="#">9091</a>   | PIGQ     | phosphatidylinositol glycan anchor biosynthesis, class Q         |
| PIN1     | 1.73 | <a href="#">5300</a>   | PIN1     | protein (peptidylprolyl cis/trans isomerase) NIMA-interacting 1  |
| LNK      | 1.73 | <a href="#">10019</a>  | SH2B3    | SH2B adaptor protein 3                                           |
| TMEM59   | 1.73 | <a href="#">9528</a>   | TMEM59   | transmembrane protein 59                                         |
| ZNF447   | 1.73 | <a href="#">65982</a>  | ZNF447   | zinc finger protein 447                                          |
| ATG9A    | 1.72 | <a href="#">79065</a>  | ATG9A    | ATG9 autophagy related 9 homolog A ( <i>S. cerevisiae</i> )      |
| MGC16385 | 1.72 | <a href="#">92806</a>  | CENPBD1  | CENPB DNA-binding domains containing 1                           |
| PCGF2    | 1.72 | <a href="#">7703</a>   | PCGF2    | polycomb group ring finger 2                                     |
| SFRP1    | 1.72 | <a href="#">6422</a>   | SFRP1    | secreted frizzled-related protein 1                              |
| 9-Sep    | 1.72 | <a href="#">10801</a>  | 9-Sep    | septin 9                                                         |
| ZNF419   | 1.72 | <a href="#">79744</a>  | ZNF419   | zinc finger protein 419                                          |
| COL4A5   | 1.71 | <a href="#">1287</a>   | COL4A5   | collagen, type IV, alpha 5 (Alport syndrome)                     |
| CSK      | 1.71 | <a href="#">1445</a>   | CSK      | c-src tyrosine kinase                                            |
| EVI5L    | 1.71 | <a href="#">115704</a> | EVI5L    | ecotropic viral integration site 5-like                          |
| FAM50A   | 1.71 | <a href="#">9130</a>   | FAM50A   | family with sequence similarity 50, member A                     |
| FOXC1    | 1.71 | <a href="#">2296</a>   | FOXC1    | forkhead box C1                                                  |
| POR      | 1.71 | <a href="#">5447</a>   | POR      | P450 (cytochrome) oxidoreductase                                 |
| WFS1     | 1.71 | <a href="#">7466</a>   | WFS1     | Wolfram syndrome 1 (wolframin)                                   |
| DNM2     | 1.70 | <a href="#">1785</a>   | DNM2     | dynamamin 2                                                      |
| H2AFY2   | 1.70 | <a href="#">55506</a>  | H2AFY2   | H2A histone family, member Y2                                    |
| LLGL1    | 1.70 | <a href="#">3996</a>   | LLGL1    | lethal giant larvae homolog 1 ( <i>Drosophila</i> )              |
| NME4     | 1.70 | <a href="#">4833</a>   | NME4     | non-metastatic cells 4, protein expressed in                     |
| POLR3H   | 1.70 | <a href="#">171568</a> | POLR3H   | polymerase (RNA) III (DNA directed) polypeptide H (22.9kD)       |
| SEPHS2   | 1.70 | <a href="#">22928</a>  | SEPHS2   | selenophosphate synthetase 2                                     |
| SUPT4H1  | 1.70 | <a href="#">6827</a>   | SUPT4H1  | suppressor of Ty 4 homolog 1 ( <i>S. cerevisiae</i> )            |

|           |      |                        |           |                                                                        |
|-----------|------|------------------------|-----------|------------------------------------------------------------------------|
| TGIF2     | 1.70 | <a href="#">60436</a>  | TGIF2     | TGFB-induced factor 2 (TALE family homeobox)                           |
| FLJ38101  | 1.70 | <a href="#">255919</a> | TMEM188   | transmembrane protein 188                                              |
| UBN1      | 1.70 | <a href="#">29855</a>  | UBN1      | ubiquitin 1                                                            |
| CD81      | 1.69 | <a href="#">975</a>    | CD81      | CD81 molecule                                                          |
| HSU79303  | 1.69 | <a href="#">29903</a>  | CCDC106   | coiled-coil domain containing 106                                      |
| CUEDC1    | 1.69 | <a href="#">404093</a> | CUEDC1    | CUE domain containing 1                                                |
| PHF21A    | 1.69 | <a href="#">51317</a>  | PHF21A    | PHD finger protein 21A                                                 |
| CENTD3    | 1.68 | <a href="#">64411</a>  | CENTD3    | centaurin, delta 3                                                     |
| CENPB     | 1.68 | <a href="#">1059</a>   | CENPB     | centromere protein B, 80kDa                                            |
| FLJ11017  | 1.68 | <a href="#">55286</a>  | C4orf19   | chromosome 4 open reading frame 19                                     |
| ID2       | 1.68 | <a href="#">3398</a>   | ID2       | inhibitor of DNA binding 2, dominant negative helix-loop-helix protein |
| ZNF219    | 1.68 | <a href="#">51222</a>  | ZNF219    | zinc finger protein 219                                                |
| IFNGR1    | 1.67 | <a href="#">3459</a>   | IFNGR1    | interferon gamma receptor 1                                            |
| MLF2      | 1.67 | <a href="#">8079</a>   | MLF2      | myeloid leukemia factor 2                                              |
| PACS1     | 1.67 | <a href="#">55690</a>  | PACS1     | phosphofurin acidic cluster sorting protein 1                          |
| PGM1      | 1.67 | <a href="#">5236</a>   | PGM1      | phosphoglucomutase 1                                                   |
| RBP1      | 1.67 | <a href="#">5947</a>   | RBP1      | retinol binding protein 1, cellular                                    |
| SC65      | 1.67 | <a href="#">10609</a>  | SC65      | synaptonemal complex protein SC65                                      |
| GALNAC4S  | 1.66 | <a href="#">51363</a>  | CHST15    | 15                                                                     |
| CCBP2     | 1.66 | <a href="#">1238</a>   | CCBP2     | chemokine binding protein 2                                            |
| GCC1      | 1.66 | <a href="#">79571</a>  | GCC1      | GRIP and coiled-coil domain containing 1                               |
| LOC613266 | 1.66 | <a href="#">613266</a> | LOC613266 | hypothetical LOC613266                                                 |
| IL4R      | 1.66 | <a href="#">3566</a>   | IL4R      | interleukin 4 receptor                                                 |
| LIMK1     | 1.66 | <a href="#">3984</a>   | LIMK1     | LIM domain kinase 1                                                    |
| PLXNA1    | 1.66 | <a href="#">5361</a>   | PLXNA1    | plexin A1                                                              |
| ST6GAL1   | 1.66 | <a href="#">6480</a>   | ST6GAL1   | ST6 beta-galactosamide alpha-2,6-sialyltransferase 1                   |
| TMCO3     | 1.66 | <a href="#">55002</a>  | TMCO3     | transmembrane and coiled-coil domains 3                                |
| TMEM41A   | 1.66 | <a href="#">90407</a>  | TMEM41A   | transmembrane protein 41A                                              |
| ZNF614    | 1.66 | <a href="#">80110</a>  | ZNF614    | zinc finger protein 614                                                |
| BCKDK     | 1.65 | <a href="#">10295</a>  | BCKDK     | branched chain ketoacid dehydrogenase kinase                           |
| CHST3     | 1.65 | <a href="#">9469</a>   | CHST3     | carbohydrate (chondroitin 6) sulfotransferase 3                        |
| OSBPL2    | 1.65 | <a href="#">9885</a>   | OSBPL2    | oxysterol binding protein-like 2                                       |
| PHF23     | 1.65 | <a href="#">79142</a>  | PHF23     | PHD finger protein 23                                                  |
| TNFRSF14  | 1.65 | <a href="#">8764</a>   | TNFRSF14  | entry mediator)                                                        |
| B3GNT6    | 1.65 | <a href="#">192134</a> | B3GNT6    | (core 3 synthase)                                                      |
| ZNF161    | 1.65 | <a href="#">7716</a>   | VEZF1     | vascular endothelial zinc finger 1                                     |
| FLJ20920  | 1.64 | <a href="#">80221</a>  | ACSF2     | acyl-CoA synthetase family member 2                                    |
| ARFGEF1   | 1.64 | <a href="#">10565</a>  | ARFGEF1   | 1(brefeldin A-inhibited)                                               |
| ANXA4     | 1.64 | <a href="#">307</a>    | ANXA4     | annexin A4                                                             |
| LRAP      | 1.64 | <a href="#">64167</a>  | ERAP2     | endoplasmic reticulum aminopeptidase 2                                 |
| FOXJ3     | 1.64 | <a href="#">22887</a>  | FOXJ3     | forkhead box J3                                                        |
| LIPA      | 1.64 | <a href="#">3988</a>   | LIPA      | lipase A, lysosomal acid, cholesterol esterase (Wolman disease)        |
| MSRB2     | 1.64 | <a href="#">22921</a>  | MSRB2     | methionine sulfoxide reductase B2                                      |
| S100A9    | 1.64 | <a href="#">6280</a>   | S100A9    | S100 calcium binding protein A9                                        |
| STC2      | 1.64 | <a href="#">8614</a>   | STC2      | stanniocalcin 2                                                        |
| SREBF1    | 1.64 | <a href="#">6720</a>   | SREBF1    | sterol regulatory element binding transcription factor 1               |

|          |      |                        |          |                                                                          |
|----------|------|------------------------|----------|--------------------------------------------------------------------------|
| TSPAN17  | 1.64 | <a href="#">26262</a>  | TSPAN17  | tetraspanin 17                                                           |
| TOMM34   | 1.64 | <a href="#">10953</a>  | TOMM34   | translocase of outer mitochondrial membrane 34                           |
| UCRC     | 1.64 | <a href="#">29796</a>  | UQCR10   | ubiquinol-cytochrome c reductase, complex III subunit X                  |
| UBTD1    | 1.64 | <a href="#">80019</a>  | UBTD1    | ubiquitin domain containing 1                                            |
| ZC3H12A  | 1.64 | <a href="#">80149</a>  | ZC3H12A  | zinc finger CCCH-type containing 12A                                     |
| AGPAT5   | 1.63 | <a href="#">55326</a>  | AGPAT5   | acyltransferase, epsilon)                                                |
| ATP1B3   | 1.63 | <a href="#">483</a>    | ATP1B3   | ATPase, Na <sup>+</sup> /K <sup>+</sup> transporting, beta 3 polypeptide |
| BRD3     | 1.63 | <a href="#">8019</a>   | BRD3     | bromodomain containing 3                                                 |
| CDC2L6   | 1.63 | <a href="#">23097</a>  | CDC2L6   | cell division cycle 2-like 6 (CDK8-like)                                 |
| CTDSP2   | 1.63 | <a href="#">10106</a>  | CTDSP2   | small phosphatase 2                                                      |
| ITPK1    | 1.63 | <a href="#">3705</a>   | ITPK1    | inositol 1,3,4-triphosphate 5/6 kinase                                   |
| PPP1CA   | 1.63 | <a href="#">5499</a>   | PPP1CA   | protein phosphatase 1, catalytic subunit, alpha isoform                  |
| SLC11A2  | 1.63 | <a href="#">4891</a>   | SLC11A2  | transporters), member 2                                                  |
| ZDHHC16  | 1.63 | <a href="#">84287</a>  | ZDHHC16  | zinc finger, DHHC-type containing 16                                     |
| AP2M1    | 1.62 | <a href="#">1173</a>   | AP2M1    | adaptor-related protein complex 2, mu 1 subunit                          |
| AKR1C3   | 1.62 | <a href="#">8644</a>   | AKR1C3   | dehydrogenase, type II)                                                  |
| CCND2    | 1.62 | <a href="#">894</a>    | CCND2    | cyclin D2                                                                |
| KLHL5    | 1.62 | <a href="#">51088</a>  | KLHL5    | kelch-like 5 (Drosophila)                                                |
| LYCAT    | 1.62 | <a href="#">253558</a> | LYCAT    | lysocardiolipin acyltransferase                                          |
| NINJ1    | 1.62 | <a href="#">4814</a>   | NINJ1    | ninjurin 1                                                               |
| ARHGEF5  | 1.62 | <a href="#">7984</a>   | ARHGEF5  | Rho guanine nucleotide exchange factor (GEF) 5                           |
| RHOBTB3  | 1.62 | <a href="#">22836</a>  | RHOBTB3  | Rho-related BTB domain containing 3                                      |
| SORT1    | 1.62 | <a href="#">6272</a>   | SORT1    | sortilin 1                                                               |
| TBC1D14  | 1.62 | <a href="#">57533</a>  | TBC1D14  | TBC1 domain family, member 14                                            |
| ACO2     | 1.61 | <a href="#">50</a>     | ACO2     | aconitase 2, mitochondrial                                               |
| GDPD5    | 1.61 | <a href="#">81544</a>  | GDPD5    | glycerophosphodiester phosphodiesterase domain containing 5              |
| GOLPH3L  | 1.61 | <a href="#">55204</a>  | GOLPH3L  | golgi phosphoprotein 3-like                                              |
| HYOU1    | 1.61 | <a href="#">10525</a>  | HYOU1    | hypoxia up-regulated 1                                                   |
| ITM2C    | 1.61 | <a href="#">81618</a>  | ITM2C    | integral membrane protein 2C                                             |
| KLHDC2   | 1.61 | <a href="#">23588</a>  | KLHDC2   | kelch domain containing 2                                                |
| KIAA0350 | 1.61 | <a href="#">23274</a>  | KIAA0350 | KIAA0350                                                                 |
| NRBP1    | 1.61 | <a href="#">29959</a>  | NRBP1    | nuclear receptor binding protein 1                                       |
| PHGDHL1  | 1.61 | <a href="#">337867</a> | PHGDHL1  | phosphoglycerate dehydrogenase like 1                                    |
| PAFAH1B1 | 1.61 | <a href="#">5048</a>   | PAFAH1B1 | 45kDa                                                                    |
| P4HA1    | 1.61 | <a href="#">5033</a>   | P4HA1    | hydroxylase), alpha polypeptide I                                        |
| PIAS3    | 1.61 | <a href="#">10401</a>  | PIAS3    | protein inhibitor of activated STAT, 3                                   |
| RDH11    | 1.61 | <a href="#">51109</a>  | RDH11    | retinol dehydrogenase 11 (all-trans/9-cis/11-cis)                        |
| TNS3     | 1.61 | <a href="#">64759</a>  | TNS3     | tensin 3                                                                 |
| TSPAN7   | 1.61 | <a href="#">7102</a>   | TSPAN7   | tetraspanin 7                                                            |
| UBE2Q2   | 1.61 | <a href="#">92912</a>  | UBE2Q2   | ubiquitin-conjugating enzyme E2Q (putative) 2                            |
| RAI17    | 1.61 | <a href="#">57178</a>  | ZMIZ1    | zinc finger, MIZ-type containing 1                                       |
| ACSL5    | 1.60 | <a href="#">51703</a>  | ACSL5    | acyl-CoA synthetase long-chain family member 5                           |
| AP3D1    | 1.60 | <a href="#">8943</a>   | AP3D1    | adaptor-related protein complex 3, delta 1 subunit                       |
| FAM104A  | 1.60 | <a href="#">84923</a>  | FAM104A  | family with sequence similarity 104, member A                            |
| GRN      | 1.60 | <a href="#">2896</a>   | GRN      | granulin                                                                 |
| HSPA5    | 1.60 | <a href="#">3309</a>   | HSPA5    | heat shock 70kDa protein 5 (glucose-regulated protein, 78kDa)            |



|           |      |                        |         |                                                                      |
|-----------|------|------------------------|---------|----------------------------------------------------------------------|
| HSP90B1   | 1.60 | <a href="#">7184</a>   | HSP90B1 | heat shock protein 90kDa beta (Grp94), member 1                      |
| SFXN1     | 1.60 | <a href="#">94081</a>  | SFXN1   | sideroflexin 1                                                       |
| STAT5B    | 1.60 | <a href="#">6777</a>   | STAT5B  | signal transducer and activator of transcription 5B                  |
| SYF2      | 1.60 | <a href="#">25949</a>  | SYF2    | SYF2 homolog, RNA splicing factor ( <i>S. cerevisiae</i> )           |
| TSPAN3    | 1.60 | <a href="#">10099</a>  | TSPAN3  | tetraspanin 3                                                        |
| TSPAN6    | 1.60 | <a href="#">7105</a>   | TSPAN6  | tetraspanin 6                                                        |
| ZFP36L1   | 1.60 | <a href="#">677</a>    | ZFP36L1 | zinc finger protein 36, C3H type-like 1                              |
| CD74      | 1.59 | <a href="#">972</a>    | CD74    | chain                                                                |
| ELL       | 1.59 | <a href="#">8178</a>   | ELL     | elongation factor RNA polymerase II                                  |
| HOXB4     | 1.59 | <a href="#">3214</a>   | HOXB4   | homeobox B4                                                          |
| ILF3      | 1.59 | <a href="#">3609</a>   | ILF3    | interleukin enhancer binding factor 3, 90kDa                         |
| TPP1      | 1.59 | <a href="#">1200</a>   | TPP1    | tripeptidyl peptidase I                                              |
| CLDN15    | 1.58 | <a href="#">24146</a>  | CLDN15  | claudin 15                                                           |
| COQ10B    | 1.58 | <a href="#">80219</a>  | COQ10B  | coenzyme Q10 homolog B ( <i>S. cerevisiae</i> )                      |
| DNAJB2    | 1.58 | <a href="#">3300</a>   | DNAJB2  | DnaJ (Hsp40) homolog, subfamily B, member 2                          |
| MTA3      | 1.58 | <a href="#">57504</a>  | MTA3    | metastasis associated 1 family, member 3                             |
| MUC20     | 1.58 | <a href="#">200958</a> | MUC20   | mucin 20, cell surface associated                                    |
| LOC133619 | 1.58 | <a href="#">133619</a> | PRRC1   | proline-rich coiled-coil 1                                           |
| SEMA4D    | 1.58 | <a href="#">10507</a>  | SEMA4D  | (TM) and short cytoplasmic domain, (semaphorin) 4D                   |
| SIPA1     | 1.58 | <a href="#">6494</a>   | SIPA1   | signal-induced proliferation-associated gene 1                       |
| TMSL3     | 1.58 | <a href="#">7117</a>   | TMSL3   | thymosin-like 3                                                      |
| TSC22D3   | 1.58 | <a href="#">1831</a>   | TSC22D3 | TSC22 domain family, member 3                                        |
| ZZEF1     | 1.58 | <a href="#">23140</a>  | ZZEF1   | zinc finger, ZZ-type with EF-hand domain 1                           |
| BRPF3     | 1.57 | <a href="#">27154</a>  | BRPF3   | bromodomain and PHD finger containing, 3                             |
| CARD11    | 1.57 | <a href="#">84433</a>  | CARD11  | caspase recruitment domain family, member 11                         |
| CTSD      | 1.57 | <a href="#">1509</a>   | CTSD    | cathepsin D (lysosomal aspartyl peptidase)                           |
| CLASP1    | 1.57 | <a href="#">23332</a>  | CLASP1  | cytoplasmic linker associated protein 1                              |
| GM2A      | 1.57 | <a href="#">2760</a>   | GM2A    | GM2 ganglioside activator                                            |
| PGRMC1    | 1.57 | <a href="#">10857</a>  | PGRMC1  | progesterone receptor membrane component 1                           |
| YTHDF3    | 1.57 | <a href="#">253943</a> | YTHDF3  | YTH domain family, member 3                                          |
| LBR       | 1.56 | <a href="#">3930</a>   | LBR     | lamin B receptor                                                     |
| LAPTM4B   | 1.56 | <a href="#">55353</a>  | LAPTM4B | lysosomal associated protein transmembrane 4 beta                    |
| MAN1B1    | 1.56 | <a href="#">11253</a>  | MAN1B1  | mannosidase, alpha, class 1B, member 1                               |
| MGAT1     | 1.56 | <a href="#">4245</a>   | MGAT1   | acetylglucosaminyltransferase                                        |
| MBTPS1    | 1.56 | <a href="#">8720</a>   | MBTPS1  | membrane-bound transcription factor peptidase, site 1                |
| NR2F6     | 1.56 | <a href="#">2063</a>   | NR2F6   | nuclear receptor subfamily 2, group F, member 6                      |
| PLOD1     | 1.56 | <a href="#">5351</a>   | PLOD1   | procollagen-lysine 1, 2-oxoglutarate 5-dioxygenase 1                 |
| RNASEH1   | 1.56 | <a href="#">246243</a> | RNASEH1 | ribonuclease H1                                                      |
| SIDT2     | 1.56 | <a href="#">51092</a>  | SIDT2   | SID1 transmembrane family, member 2                                  |
| SPHK2     | 1.56 | <a href="#">56848</a>  | SPHK2   | sphingosine kinase 2                                                 |
| SPRY1     | 1.56 | <a href="#">10252</a>  | SPRY1   | sprouty homolog 1, antagonist of FGF signaling ( <i>Drosophila</i> ) |
| TST       | 1.56 | <a href="#">7263</a>   | TST     | thiosulfate sulfurtransferase (rhodanese)                            |
| TMEM113   | 1.56 | <a href="#">80335</a>  | TMEM113 | transmembrane protein 113                                            |
| TSC22D4   | 1.56 | <a href="#">81628</a>  | TSC22D4 | TSC22 domain family, member 4                                        |
| DHCR7     | 1.55 | <a href="#">1717</a>   | DHCR7   | 7-dehydrocholesterol reductase                                       |
| E2F6      | 1.55 | <a href="#">1876</a>   | E2F6    | E2F transcription factor 6                                           |

|           |      |                        |          |                                                                    |
|-----------|------|------------------------|----------|--------------------------------------------------------------------|
| NDRG4     | 1.55 | <a href="#">65009</a>  | NDRG4    | NDRG family member 4                                               |
| PTPLA     | 1.55 | <a href="#">9200</a>   | PTPLA    | member A                                                           |
| RHOQ      | 1.55 | <a href="#">23433</a>  | RHOQ     | ras homolog gene family, member Q                                  |
| SPEN      | 1.55 | <a href="#">23013</a>  | SPEN     | spen homolog, transcriptional regulator (Drosophila)               |
| DEDD2     | 1.54 | <a href="#">162989</a> | DEDD2    | death effector domain containing 2                                 |
| HN1       | 1.54 | <a href="#">51155</a>  | HN1      | hematological and neurological expressed 1                         |
| MAPRE3    | 1.54 | <a href="#">22924</a>  | MAPRE3   | microtubule-associated protein, RP/EB family, member 3             |
| NCK2      | 1.54 | <a href="#">8440</a>   | NCK2     | NCK adaptor protein 2                                              |
| STMN3     | 1.54 | <a href="#">50861</a>  | STMN3    | stathmin-like 3                                                    |
| TAF10     | 1.54 | <a href="#">6881</a>   | TAF10    | associated factor, 30kDa                                           |
| TBL1XR1   | 1.54 | <a href="#">79718</a>  | TBL1XR1  | transducin (beta)-like 1X-linked receptor 1                        |
| TMEM32    | 1.54 | <a href="#">93380</a>  | TMEM32   | transmembrane protein 32                                           |
| ANKRD33   | 1.53 | <a href="#">341405</a> | ANKRD33  | ankyrin repeat domain 33                                           |
| LOC388272 | 1.53 | <a href="#">388272</a> | C16orf87 | chromosome 16 open reading frame 87                                |
| IRAK2     | 1.53 | <a href="#">3656</a>   | IRAK2    | interleukin-1 receptor-associated kinase 2                         |
| FLJ14154  | 1.53 | <a href="#">79903</a>  | NAT15    | N-acetyltransferase 15 (GCN5-related, putative)                    |
| NTE       | 1.53 | <a href="#">10908</a>  | PNPLA6   | patatin-like phospholipase domain containing 6                     |
| SNURF     | 1.53 | <a href="#">8926</a>   | SNURF    | SNRPN upstream reading frame                                       |
| TYSND1    | 1.53 | <a href="#">219743</a> | TYSND1   | trypsin domain containing 1                                        |
| SLITL2    | 1.53 | <a href="#">114990</a> | VASN     | vasorin                                                            |
| VAV2      | 1.53 | <a href="#">7410</a>   | VAV2     | vav 2 oncogene                                                     |
| DEGS1     | 1.52 | <a href="#">8560</a>   | DEGS1    | degenerative spermatocyte homolog 1, lipid desaturase (Drosophila) |
| DGCR2     | 1.52 | <a href="#">9993</a>   | DGCR2    | DiGeorge syndrome critical region gene 2                           |
| EVL       | 1.52 | <a href="#">51466</a>  | EVL      | Enah/Vasp-like                                                     |
| EEF1A2    | 1.52 | <a href="#">1917</a>   | EEF1A2   | eukaryotic translation elongation factor 1 alpha 2                 |
| ITM2B     | 1.52 | <a href="#">9445</a>   | ITM2B    | integral membrane protein 2B                                       |
| LGALS3BP  | 1.52 | <a href="#">3959</a>   | LGALS3BP | lectin, galactoside-binding, soluble, 3 binding protein            |
| MYLIP     | 1.52 | <a href="#">29116</a>  | MYLIP    | myosin regulatory light chain interacting protein                  |
| PRKCD     | 1.52 | <a href="#">5580</a>   | PRKCD    | protein kinase C, delta                                            |
| RHO       | 1.52 | <a href="#">58480</a>  | RHO      | ras homolog gene family, member U                                  |
| SLC17A5   | 1.52 | <a href="#">26503</a>  | SLC17A5  | solute carrier family 17 (anion/sugar transporter), member 5       |
| TMEM106C  | 1.52 | <a href="#">79022</a>  | TMEM106C | transmembrane protein 106C                                         |
| C7ORF28A  | 1.51 | <a href="#">51622</a>  | C7orf28A | chromosome 7 open reading frame 28A                                |
| DAP       | 1.51 | <a href="#">1611</a>   | DAP      | death-associated protein                                           |
| DPP4      | 1.51 | <a href="#">1803</a>   | DPP4     | protein 2)                                                         |
| FUT3      | 1.51 | <a href="#">2525</a>   | FUT3     | blood group)                                                       |
| IRF1      | 1.51 | <a href="#">3659</a>   | IRF1     | interferon regulatory factor 1                                     |
| C3ORF9    | 1.51 | <a href="#">56983</a>  | KTELC1   | KTEL (Lys-Tyr-Glu-Leu) containing 1                                |
| KIAA1688  | 1.51 | <a href="#">80728</a>  | ARHGAP39 | Rho GTPase activating protein 39                                   |
| TXNDC5    | 1.51 | <a href="#">81567</a>  | TXNDC5   | thioredoxin domain containing 5                                    |
| ATAD4     | 1.50 | <a href="#">79170</a>  | ATAD4    | ATPase family, AAA domain containing 4                             |
| CPD       | 1.50 | <a href="#">1362</a>   | CPD      | carboxypeptidase D                                                 |
| C7ORF28B  | 1.50 | <a href="#">51622</a>  | C7orf28A | chromosome 7 open reading frame 28A                                |
| KIAA0427  | 1.50 | <a href="#">9811</a>   | KIAA0427 | KIAA0427                                                           |
| LARP5     | 1.50 | <a href="#">23185</a>  | LARP5    | La ribonucleoprotein domain family, member 5                       |
| NIPA2     | 1.50 | <a href="#">81614</a>  | NIPA2    | non imprinted in Prader-Willi/Angelman syndrome 2                  |

|           |      |                        |          |                                                                        |
|-----------|------|------------------------|----------|------------------------------------------------------------------------|
| SCAP      | 1.50 | <a href="#">22937</a>  | SCAP     | SREBF chaperone                                                        |
| UBXD1     | 1.50 | <a href="#">80700</a>  | UBXD1    | UBX domain containing 1                                                |
| MMD       | 1.49 | <a href="#">23531</a>  | MMD      | monocyte to macrophage differentiation-associated                      |
| NEK6      | 1.49 | <a href="#">10783</a>  | NEK6     | NIMA (never in mitosis gene a)-related kinase 6                        |
| PSAT1     | 1.49 | <a href="#">29968</a>  | PSAT1    | phosphoserine aminotransferase 1                                       |
| PROM1     | 1.49 | <a href="#">8842</a>   | PROM1    | prominin 1                                                             |
| PPP1R16A  | 1.49 | <a href="#">84988</a>  | PPP1R16A | protein phosphatase 1, regulatory (inhibitor) subunit 16A              |
| RALGDS    | 1.49 | <a href="#">5900</a>   | RALGDS   | ral guanine nucleotide dissociation stimulator                         |
| SUMO3     | 1.49 | <a href="#">6612</a>   | SUMO3    | SMT3 suppressor of mif two 3 homolog 3 ( <i>S. cerevisiae</i> )        |
| SC4MOL    | 1.49 | <a href="#">6307</a>   | SC4MOL   | sterol-C4-methyl oxidase-like                                          |
| ST14      | 1.49 | <a href="#">6768</a>   | ST14     | suppression of tumorigenicity 14 (colon carcinoma)                     |
| B2M       | 1.48 | <a href="#">567</a>    | B2M      | beta-2-microglobulin                                                   |
| CD63      | 1.48 | <a href="#">967</a>    | CD63     | CD63 molecule                                                          |
| CLTB      | 1.48 | <a href="#">1212</a>   | CLTB     | clathrin, light chain (Lcb)                                            |
| EML4      | 1.48 | <a href="#">27436</a>  | EML4     | echinoderm microtubule associated protein like 4                       |
| HK1       | 1.48 | <a href="#">3098</a>   | HK1      | hexokinase 1                                                           |
| NOMO1     | 1.48 | <a href="#">23420</a>  | NOMO1    | NODAL modulator 1                                                      |
| RAD54L2   | 1.48 | <a href="#">23132</a>  | RAD54L2  | RAD54-like 2 ( <i>S. cerevisiae</i> )                                  |
| RCN2      | 1.48 | <a href="#">5955</a>   | RCN2     | reticulocalbin 2, EF-hand calcium binding domain                       |
| SLC16A3   | 1.48 | <a href="#">9123</a>   | SLC16A3  | solute carrier family 16, member 3 (monocarboxylic acid transporter 4) |
| XYLT2     | 1.48 | <a href="#">64132</a>  | XYLT2    | xylosyltransferase II                                                  |
| FLJ13149  | 1.48 | <a href="#">60493</a>  | FASTKD5  | FAST kinase domains 5                                                  |
| FLJ20186  | 1.48 | <a href="#">54849</a>  | DEF8     | Differentially expressed in FDCP 8 homolog (mouse)                     |
| LOC221955 | 1.48 | -                      | -        | -                                                                      |
| CD47      | 1.47 | <a href="#">961</a>    | CD47     | CD47 molecule                                                          |
| CCND3     | 1.47 | <a href="#">896</a>    | CCND3    | cyclin D3                                                              |
| NPLOC4    | 1.47 | <a href="#">55666</a>  | NPLOC4   | nuclear protein localization 4 homolog ( <i>S. cerevisiae</i> )        |
| PHF12     | 1.47 | <a href="#">57649</a>  | PHF12    | PHD finger protein 12                                                  |
| PITPNM1   | 1.47 | <a href="#">9600</a>   | PITPNM1  | phosphatidylinositol transfer protein, membrane-associated 1           |
| RABAC1    | 1.47 | <a href="#">10567</a>  | RABAC1   | Rab acceptor 1 (prenylated)                                            |
| RPN2      | 1.47 | <a href="#">6185</a>   | RPN2     | ribophorin II                                                          |
| SSR1      | 1.47 | <a href="#">6745</a>   | SSR1     | signal sequence receptor, alpha                                        |
| TLCD1     | 1.47 | <a href="#">116238</a> | TLCD1    | TLC domain containing 1                                                |
| USP39     | 1.47 | <a href="#">10713</a>  | USP39    | ubiquitin specific peptidase 39                                        |
| WDR45L    | 1.47 | <a href="#">56270</a>  | WDR45L   | WDR45-like                                                             |
| 11-Sep    | 1.47 | <a href="#">55752</a>  | 11-Sep   | septin 11                                                              |
| ISGF3G    | 1.47 | <a href="#">10379</a>  | IFR9     | interferon-stimulated transcription factor 3, gamma                    |
| GAK       | 1.46 | <a href="#">2580</a>   | GAK      | cyclin G associated kinase                                             |
| GULP1     | 1.46 | <a href="#">51454</a>  | GULP1    | GULP, engulfment adaptor PTB domain containing 1                       |
| MALL      | 1.46 | <a href="#">7851</a>   | MALL     | mal, T-cell differentiation protein-like                               |
| M6PR      | 1.46 | <a href="#">4074</a>   | M6PR     | mannose-6-phosphate receptor (cation dependent)                        |
| MAPK3     | 1.46 | <a href="#">5595</a>   | MAPK3    | mitogen-activated protein kinase 3                                     |
| PDIA6     | 1.46 | <a href="#">10130</a>  | PDIA6    | protein disulfide isomerase family A, member 6                         |
| ZNF609    | 1.46 | <a href="#">23060</a>  | ZNF609   | zinc finger protein 609                                                |
| FAM62A    | 1.46 | <a href="#">23344</a>  | ESYT1    | extended synaptotagmin-like protein 1                                  |
| ALDH3A2   | 1.45 | <a href="#">224</a>    | ALDH3A2  | aldehyde dehydrogenase 3 family, member A2                             |

|           |      |                        |           |                                                                    |
|-----------|------|------------------------|-----------|--------------------------------------------------------------------|
| CTTN      | 1.45 | <a href="#">2017</a>   | CTTN      | cortactin                                                          |
| CDK6      | 1.45 | <a href="#">1021</a>   | CDK6      | cyclin-dependent kinase 6                                          |
| GTF3A     | 1.45 | <a href="#">2971</a>   | GTF3A     | general transcription factor IIIA                                  |
| LACTB     | 1.45 | <a href="#">114294</a> | LACTB     | lactamase, beta                                                    |
| NFIB      | 1.45 | <a href="#">4781</a>   | NFIB      | nuclear factor I/B                                                 |
| SCRN1     | 1.45 | <a href="#">9805</a>   | SCRN1     | secernin 1                                                         |
| STK35     | 1.45 | <a href="#">140901</a> | STK35     | serine/threonine kinase 35                                         |
| SERPINA3  | 1.45 | <a href="#">12</a>     | SERPINA3  | member 3                                                           |
| TXNIP     | 1.45 | <a href="#">10628</a>  | TXNIP     | thioredoxin interacting protein                                    |
| TMED3     | 1.45 | <a href="#">23423</a>  | TMED3     | transmembrane emp24 protein transport domain containing 3          |
| UCHL1     | 1.45 | <a href="#">7345</a>   | UCHL1     | ubiquitin carboxyl-terminal esterase L1 (ubiquitin thiolesterase)  |
| CAPN5     | 1.44 | <a href="#">726</a>    | CAPN5     | calpain 5                                                          |
| CHURC1    | 1.44 | <a href="#">91612</a>  | CHURC1    | churchill domain containing 1                                      |
| CORO1B    | 1.44 | <a href="#">57175</a>  | CORO1B    | coronin, actin binding protein, 1B                                 |
| DBI       | 1.44 | <a href="#">1622</a>   | DBI       | (Coenzyme A binding protein)                                       |
| FTL       | 1.44 | <a href="#">2512</a>   | FTL       | ferritin, light polypeptide                                        |
| HEBP2     | 1.44 | <a href="#">23593</a>  | HEBP2     | heme binding protein 2                                             |
| JARID2    | 1.44 | <a href="#">3720</a>   | JARID2    | jumonji, AT rich interactive domain 2                              |
| KLHDC5    | 1.44 | <a href="#">57542</a>  | KLHDC5    | kelch domain containing 5                                          |
| LARP6     | 1.44 | <a href="#">55323</a>  | LARP6     | La ribonucleoprotein domain family, member 6                       |
| MIF       | 1.44 | <a href="#">4282</a>   | MIF       | factor)                                                            |
| PFKM      | 1.44 | <a href="#">5213</a>   | PFKM      | phosphofructokinase, muscle                                        |
| S100A14   | 1.44 | <a href="#">57402</a>  | S100A14   | S100 calcium binding protein A14                                   |
| SHMT2     | 1.44 | <a href="#">6472</a>   | SHMT2     | serine hydroxymethyltransferase 2 (mitochondrial)                  |
| TMED9     | 1.44 | <a href="#">54732</a>  | TMED9     | transmembrane emp24 protein transport domain containing 9          |
| LAMB1     | 1.43 | <a href="#">3912</a>   | LAMB1     | laminin, beta 1                                                    |
| MAP3K4    | 1.43 | <a href="#">4216</a>   | MAP3K4    | mitogen-activated protein kinase kinase kinase 4                   |
| PPL       | 1.43 | <a href="#">5493</a>   | PPL       | periplakin                                                         |
| PPP2R2C   | 1.43 | <a href="#">5522</a>   | PPP2R2C   | isoform                                                            |
| SUOX      | 1.43 | <a href="#">6821</a>   | SUOX      | sulfite oxidase                                                    |
| TNFRSF11B | 1.43 | <a href="#">4982</a>   | TNFRSF11B | tumor necrosis factor receptor superfamily, member 11b             |
| ABHD4     | 1.42 | <a href="#">63874</a>  | ABHD4     | abhydrolase domain containing 4                                    |
| CLNS1A    | 1.42 | <a href="#">1207</a>   | CLNS1A    | chloride channel, nucleotide-sensitive, 1A                         |
| CFB       | 1.42 | <a href="#">629</a>    | CFB       | complement factor B                                                |
| GLT25D1   | 1.42 | <a href="#">79709</a>  | GLT25D1   | glycosyltransferase 25 domain containing 1                         |
| GNB1      | 1.42 | <a href="#">2782</a>   | GNB1      | guanine nucleotide binding protein (G protein), beta polypeptide 1 |
| LCP1      | 1.42 | <a href="#">3936</a>   | LCP1      | lymphocyte cytosolic protein 1 (L-plastin)                         |
| NFKBIA    | 1.42 | <a href="#">4792</a>   | NFKBIA    | inhibitor, alpha                                                   |
| YWHAB     | 1.42 | <a href="#">7529</a>   | YWHAB     | protein, beta polypeptide                                          |
| LOC203547 | 1.42 | <a href="#">203547</a> | VMA21     | VMA21 vacuolar H <sup>+</sup> -ATPase homolog (S. cerevisiae)      |
| PBEF1     | 1.42 | <a href="#">10135</a>  | NAMPT     | nicotinamide phosphoribosyltransferase                             |
| CAPN1     | 1.41 | <a href="#">823</a>    | CAPN1     | calpain 1, (mu/I) large subunit                                    |
| KDEL2     | 1.41 | <a href="#">11014</a>  | KDEL2     | receptor 2                                                         |
| LCN2      | 1.41 | <a href="#">3934</a>   | LCN2      | lipocalin 2                                                        |
| PIGM      | 1.41 | <a href="#">93183</a>  | PIGM      | phosphatidylinositol glycan anchor biosynthesis, class M           |
| ARHGAP27  | 1.41 | <a href="#">201176</a> | ARHGAP27  | Rho GTPase activating protein 27                                   |

|           |       |                        |           |                                                                     |
|-----------|-------|------------------------|-----------|---------------------------------------------------------------------|
| DNMT1     | 1.40  | <a href="#">1786</a>   | DNMT1     | DNA (cytosine-5-)-methyltransferase 1                               |
| SCARB1    | 1.40  | <a href="#">949</a>    | SCARB1    | scavenger receptor class B, member 1                                |
| SPIRE1    | 1.40  | <a href="#">56907</a>  | SPIRE1    | spire homolog 1 (Drosophila)                                        |
| SPON1     | 1.40  | <a href="#">10418</a>  | SPON1     | spondin 1, extracellular matrix protein                             |
| TMEM9     | 1.40  | <a href="#">252839</a> | TMEM9     | transmembrane protein 9                                             |
| CCDC59    | -1.40 | <a href="#">29080</a>  | CCDC59    | coiled-coil domain containing 59                                    |
| CNIH      | -1.40 | <a href="#">10175</a>  | CNIH      | cornichon homolog (Drosophila)                                      |
| MRPS5     | -1.40 | <a href="#">64969</a>  | MRPS5     | mitochondrial ribosomal protein S5                                  |
| NSMCE1    | -1.40 | <a href="#">197370</a> | NSMCE1    | non-SMC element 1 homolog (S. cerevisiae)                           |
| RPS27L    | -1.40 | <a href="#">51065</a>  | RPS27L    | ribosomal protein S27-like                                          |
| TMPRSS4   | -1.40 | <a href="#">56649</a>  | TMPRSS4   | transmembrane protease, serine 4                                    |
| C2ORF4    | -1.40 | <a href="#">51072</a>  | MEMO1     | mediator of cell motility 1                                         |
| FLJ90586  | -1.40 | <a href="#">135932</a> | TMEM139   | transmembrane protein 139                                           |
| LOC348262 | -1.40 | <a href="#">348262</a> | FAM195B   | family with sequence similarity 195, member B                       |
| CDK5RAP1  | -1.41 | <a href="#">51654</a>  | CDK5RAP1  | CDK5 regulatory subunit associated protein 1                        |
| CHCHD3    | -1.41 | <a href="#">54927</a>  | CHCHD3    | coiled-coil-helix-coiled-coil-helix domain containing 3             |
| COX7A2    | -1.41 | <a href="#">1347</a>   | COX7A2    | cytochrome c oxidase subunit VIIa polypeptide 2 (liver)             |
| DHRS1     | -1.41 | <a href="#">115817</a> | DHRS1     | dehydrogenase/reductase (SDR family) member 1                       |
| FOLR1     | -1.41 | <a href="#">2348</a>   | FOLR1     | folate receptor 1 (adult)                                           |
| LYAR      | -1.41 | <a href="#">55646</a>  | LYAR      | Ly1 antibody reactive homolog (mouse)                               |
| PAK1IP1   | -1.41 | <a href="#">55003</a>  | PAK1IP1   | PAK1 interacting protein 1                                          |
| RPS20     | -1.41 | <a href="#">6224</a>   | RPS20     | ribosomal protein S20                                               |
| RFWD2     | -1.41 | <a href="#">64326</a>  | RFWD2     | ring finger and WD repeat domain 2                                  |
| C14ORF32  | -1.41 | <a href="#">93487</a>  | MAPK1IP1L | mitogen-activated protein kinase 1 interacting protein 1-like       |
| HSA9761   | -1.41 | <a href="#">27292</a>  | DIMT1L    | DIM1 dimethyladenosine transferase 1-like (S. cerevisiae)           |
| WDR68     | -1.41 | <a href="#">10238</a>  | DCAF7     | DDB1 and CUL4 associated factor 7                                   |
| CYP4F11   | -1.42 | <a href="#">57834</a>  | CYP4F11   | cytochrome P450, family 4, subfamily F, polypeptide 11              |
| DDX10     | -1.42 | <a href="#">1662</a>   | DDX10     | DEAD (Asp-Glu-Ala-Asp) box polypeptide 10                           |
| DTYMK     | -1.42 | <a href="#">1841</a>   | DTYMK     | deoxythymidylate kinase (thymidylate kinase)                        |
| GNL3L     | -1.42 | <a href="#">54552</a>  | GNL3L     | guanine nucleotide binding protein-like 3 (nucleolar)-like          |
| MXRA7     | -1.42 | <a href="#">439921</a> | MXRA7     | matrix-remodelling associated 7                                     |
| MRPS23    | -1.42 | <a href="#">51649</a>  | MRPS23    | mitochondrial ribosomal protein S23                                 |
| RPL23A    | -1.42 | <a href="#">6147</a>   | RPL23A    | ribosomal protein L23a                                              |
| WBSCR22   | -1.42 | <a href="#">114049</a> | WBSCR22   | Williams Beuren syndrome chromosome region 22                       |
| WIBG      | -1.42 | <a href="#">84305</a>  | WIBG      | within bgcn homolog (Drosophila)                                    |
| C12ORF62  | -1.42 | <a href="#">84987</a>  | C12ORF62  | chromosome 12 open reading frame 62                                 |
| DNCL2A    | -1.42 | <a href="#">83658</a>  | DYNLRB1   | dynein, light chain, roadblock-type 1                               |
| MAGMAS    | -1.42 | <a href="#">51025</a>  | PAM16     | presequence translocase-associated motor 16 homolog (S. cerevisiae) |
| BCS1L     | -1.43 | <a href="#">617</a>    | BCS1L     | BCS1-like (yeast)                                                   |
| CHMP4B    | -1.43 | <a href="#">128866</a> | CHMP4B    | chromatin modifying protein 4B                                      |
| OSBPL10   | -1.43 | <a href="#">114884</a> | OSBPL10   | oxysterol binding protein-like 10                                   |
| SNRPA1    | -1.43 | <a href="#">6627</a>   | SNRPA1    | small nuclear ribonucleoprotein polypeptide A'                      |
| SNAPC2    | -1.43 | <a href="#">6618</a>   | SNAPC2    | small nuclear RNA activating complex, polypeptide 2, 45kDa          |
| SMARCC1   | -1.43 | <a href="#">6599</a>   | SMARCC1   | chromatin, subfamily c, member 1                                    |
| TRIP13    | -1.43 | <a href="#">9319</a>   | TRIP13    | thyroid hormone receptor interactor 13                              |
| TMEM85    | -1.43 | <a href="#">51234</a>  | TMEM85    | transmembrane protein 85                                            |

|          |       |                        |          |                                                                             |
|----------|-------|------------------------|----------|-----------------------------------------------------------------------------|
| CSTF3    | -1.44 | <a href="#">1479</a>   | CSTF3    | cleavage stimulation factor, 3' pre-RNA, subunit 3, 77kDa                   |
| COBLL1   | -1.44 | <a href="#">22837</a>  | COBLL1   | COBL-like 1                                                                 |
| CKB      | -1.44 | <a href="#">1152</a>   | CKB      | creatine kinase, brain                                                      |
| CYR61    | -1.44 | <a href="#">3491</a>   | CYR61    | cysteine-rich, angiogenic inducer, 61                                       |
| DDT      | -1.44 | <a href="#">1652</a>   | DDT      | D-dopachrome tautomerase                                                    |
| DYRK4    | -1.44 | <a href="#">8798</a>   | DYRK4    | dual-specificity tyrosine-(Y)-phosphorylation regulated kinase 4            |
| FN3KRP   | -1.44 | <a href="#">79672</a>  | FN3KRP   | fructosamine 3 kinase related protein                                       |
| GPS2     | -1.44 | <a href="#">2874</a>   | GPS2     | G protein pathway suppressor 2                                              |
| GPR110   | -1.44 | <a href="#">266977</a> | GPR110   | G protein-coupled receptor 110                                              |
| GSTK1    | -1.44 | <a href="#">373156</a> | GSTK1    | glutathione S-transferase kappa 1                                           |
| HMBS     | -1.44 | <a href="#">3145</a>   | HMBS     | hydroxymethylbilane synthase                                                |
| IFRD2    | -1.44 | <a href="#">7866</a>   | IFRD2    | interferon-related developmental regulator 2                                |
| LTV1     | -1.44 | <a href="#">84946</a>  | LTV1     | LTV1 homolog ( <i>S. cerevisiae</i> )                                       |
| NHP2L1   | -1.44 | <a href="#">4809</a>   | NHP2L1   | NHP2 non-histone chromosome protein 2-like 1 ( <i>S. cerevisiae</i> )       |
| PROSC    | -1.44 | <a href="#">11212</a>  | PROSC    | proline synthetase co-transcribed homolog (bacterial)                       |
| PSMA1    | -1.44 | <a href="#">5682</a>   | PSMA1    | proteasome (prosome, macropain) subunit, alpha type, 1                      |
| QTRT1    | -1.44 | <a href="#">81890</a>  | QTRT1    | queuine tRNA-ribosyltransferase 1                                           |
| RNF14    | -1.44 | <a href="#">9604</a>   | RNF14    | ring finger protein 14                                                      |
| WDR12    | -1.44 | <a href="#">55759</a>  | WDR12    | WD repeat domain 12                                                         |
| C21ORF45 | -1.44 | <a href="#">54069</a>  | C21ORF45 | chromosome 21 open reading frame 45                                         |
| FLJ21908 | -1.44 | <a href="#">79657</a>  | RPAP3    | RNA polymerase II associated protein 3                                      |
| MRCL3    | -1.44 | <a href="#">10627</a>  | MYL12A   | myosin, light chain 12A, regulatory, non-sarcomeric                         |
| ANAPC13  | -1.45 | <a href="#">25847</a>  | ANAPC13  | anaphase promoting complex subunit 13                                       |
| ABCE1    | -1.45 | <a href="#">6059</a>   | ABCE1    | ATP-binding cassette, sub-family E (OABP), member 1                         |
| BLOC1S1  | -1.45 | <a href="#">2647</a>   | BLOC1S1  | biogenesis of lysosomal organelles complex-1, subunit 1                     |
| CCNK     | -1.45 | <a href="#">8812</a>   | CCNK     | cyclin K                                                                    |
| MRPL54   | -1.45 | <a href="#">116541</a> | MRPL54   | mitochondrial ribosomal protein L54                                         |
| COMMD3   | -1.46 | <a href="#">23412</a>  | COMMD3   | COMM domain containing 3                                                    |
| FAM73A   | -1.46 | <a href="#">374986</a> | FAM73A   | family with sequence similarity 73, member A                                |
| HIGD2A   | -1.46 | <a href="#">192286</a> | HIGD2A   | HIG1 hypoxia inducible domain family, member 2A                             |
| MRPL41   | -1.46 | <a href="#">64975</a>  | MRPL41   | mitochondrial ribosomal protein L41                                         |
| MRPL46   | -1.46 | <a href="#">26589</a>  | MRPL46   | mitochondrial ribosomal protein L46                                         |
| NOLC1    | -1.46 | <a href="#">9221</a>   | NOLC1    | nucleolar and coiled-body phosphoprotein 1                                  |
| NOC3L    | -1.46 | <a href="#">64318</a>  | NOC3L    | nucleolar complex associated 3 homolog ( <i>S. cerevisiae</i> )             |
| PEX5     | -1.46 | <a href="#">5830</a>   | PEX5     | peroxisomal biogenesis factor 5                                             |
| PIR      | -1.46 | <a href="#">8544</a>   | PIR      | pirin (iron-binding nuclear protein)                                        |
| PTGES    | -1.46 | <a href="#">9536</a>   | PTGES    | prostaglandin E synthase                                                    |
| RND3     | -1.46 | <a href="#">390</a>    | RND3     | Rho family GTPase 3                                                         |
| RPL26L1  | -1.46 | <a href="#">51121</a>  | RPL26L1  | ribosomal protein L26-like 1                                                |
| RPS4X    | -1.46 | <a href="#">6191</a>   | RPS4X    | ribosomal protein S4, X-linked                                              |
| RRN3     | -1.46 | <a href="#">54700</a>  | RRN3     | RRN3 RNA polymerase I transcription factor homolog ( <i>S. cerevisiae</i> ) |
| TBC1D22A | -1.46 | <a href="#">25771</a>  | TBC1D22A | TBC1 domain family, member 22A                                              |
| VRK1     | -1.46 | <a href="#">7443</a>   | VRK1     | vaccinia related kinase 1                                                   |
| C20ORF7  | -1.46 | <a href="#">79133</a>  | C20ORF7  | chromosome 20 open reading frame 7                                          |
| HSPC117  | -1.46 | <a href="#">51493</a>  | C22orf28 | chromosome 22 open reading frame 28                                         |
| MGC33212 | -1.46 | <a href="#">255758</a> | TCTEX1D2 | Tctex1 domain containing 2                                                  |

|          |       |                        |          |                                                                    |
|----------|-------|------------------------|----------|--------------------------------------------------------------------|
| CKS2     | -1.47 | <a href="#">1164</a>   | CKS2     | CDC28 protein kinase regulatory subunit 2                          |
| CHCHD8   | -1.47 | <a href="#">51287</a>  | CHCHD8   | coiled-coil-helix-coiled-coil-helix domain containing 8            |
| METAP2   | -1.47 | <a href="#">10988</a>  | METAP2   | methionyl aminopeptidase 2                                         |
| MRPS16   | -1.47 | <a href="#">51021</a>  | MRPS16   | mitochondrial ribosomal protein S16                                |
| OBFC2A   | -1.47 | <a href="#">64859</a>  | OBFC2A   | oligonucleotide/oligosaccharide-binding fold containing 2A         |
| SAV1     | -1.47 | <a href="#">60485</a>  | SAV1     | salvador homolog 1 (Drosophila)                                    |
| HSPC111  | -1.47 | <a href="#">51491</a>  | NOP16    | NOP16 nucleolar protein homolog (yeast)                            |
| NT5C3    | -1.48 | <a href="#">51251</a>  | NT5C3    | 5'-nucleotidase, cytosolic III                                     |
| BCCIP    | -1.48 | <a href="#">56647</a>  | BCCIP    | BRCA2 and CDKN1A interacting protein                               |
| BYSL     | -1.48 | <a href="#">705</a>    | BYSL     | bystin-like                                                        |
| CIRBP    | -1.48 | <a href="#">1153</a>   | CIRBP    | cold inducible RNA binding protein                                 |
| EMP1     | -1.48 | <a href="#">2012</a>   | EMP1     | epithelial membrane protein 1                                      |
| GLA      | -1.48 | <a href="#">2717</a>   | GLA      | galactosidase, alpha                                               |
| GTF2IRD2 | -1.48 | <a href="#">84163</a>  | GTF2IRD2 | GTF2I repeat domain containing 2                                   |
| KRT8     | -1.48 | <a href="#">3856</a>   | KRT8     | keratin 8                                                          |
| LRRFIP2  | -1.48 | <a href="#">9209</a>   | LRRFIP2  | leucine rich repeat (in FLII) interacting protein 2                |
| MRPS21   | -1.48 | <a href="#">54460</a>  | MRPS21   | mitochondrial ribosomal protein S21                                |
| NUDC     | -1.48 | <a href="#">10726</a>  | NUDC     | nuclear distribution gene C homolog (A. nidulans)                  |
| SAAL1    | -1.48 | <a href="#">113174</a> | SAAL1    | serum amyloid A-like 1                                             |
| SRP72    | -1.48 | <a href="#">6731</a>   | SRP72    | signal recognition particle 72kDa                                  |
| SNRPG    | -1.48 | <a href="#">6637</a>   | SNRPG    | small nuclear ribonucleoprotein polypeptide G                      |
| VPS29    | -1.48 | <a href="#">51699</a>  | VPS29    | vacuolar protein sorting 29 homolog (S. cerevisiae)                |
| C15ORF15 | -1.48 | <a href="#">51187</a>  | RSL24D1  | ribosomal L24 domain containing 1                                  |
| C19ORF33 | -1.48 | <a href="#">64073</a>  | C19orf33 | chromosome 19 open reading frame 33                                |
| HSPC176  | -1.48 | <a href="#">51693</a>  | TRAPPC2L | trafficking protein particle complex 2-like                        |
| PSARL    | -1.48 | <a href="#">55486</a>  | PARL     | presenilin associated, rhomboid-like                               |
| BTF3     | -1.49 | <a href="#">689</a>    | BTF3     | basic transcription factor 3                                       |
| COPS3    | -1.49 | <a href="#">8533</a>   | COPS3    | COP9 constitutive photomorphogenic homolog subunit 3 (Arabidopsis) |
| FJX1     | -1.49 | <a href="#">24147</a>  | FJX1     | four jointed box 1 (Drosophila)                                    |
| GRPEL1   | -1.49 | <a href="#">80273</a>  | GRPEL1   | GrpE-like 1, mitochondrial (E. coli)                               |
| MRPL18   | -1.49 | <a href="#">29074</a>  | MRPL18   | mitochondrial ribosomal protein L18                                |
| PLAU     | -1.49 | <a href="#">5328</a>   | PLAU     | plasminogen activator, urokinase                                   |
| RBM28    | -1.49 | <a href="#">55131</a>  | RBM28    | RNA binding motif protein 28                                       |
| SERPINB1 | -1.49 | <a href="#">1992</a>   | SERPINB1 | serpin peptidase inhibitor, clade B (ovalbumin), member 1          |
| LTB4DH   | -1.49 | <a href="#">22949</a>  | PTGR1    | prostaglandin reductase 1                                          |
| ATP5O    | -1.50 | <a href="#">539</a>    | ATP5O    | (oligomycin sensitivity conferring protein)                        |
| CSNK2B   | -1.50 | <a href="#">1460</a>   | CSNK2B   | casein kinase 2, beta polypeptide                                  |
| C10ORF65 | -1.50 | <a href="#">112817</a> | DHDPSL   | dihydrodipicolinate synthase-like, mitochondrial                   |
| SELI     | -1.50 | <a href="#">85465</a>  | EPT1     | ethanolaminophosphotransferase 1 (CDP-ethanolamine-specific)       |
| GLRX     | -1.50 | <a href="#">2745</a>   | GLRX     | glutaredoxin (thioltransferase)                                    |
| IVNS1ABP | -1.50 | <a href="#">10625</a>  | IVNS1ABP | influenza virus NS1A binding protein                               |
| KIAA0020 | -1.50 | <a href="#">9933</a>   | KIAA0020 | KIAA0020                                                           |
| MRPL20   | -1.50 | <a href="#">55052</a>  | MRPL20   | mitochondrial ribosomal protein L20                                |
| PEF1     | -1.50 | <a href="#">553115</a> | PEF1     | penta-EF-hand domain containing 1                                  |
| RPL4     | -1.50 | <a href="#">6124</a>   | RPL4     | ribosomal protein L4                                               |
| RPL7L1   | -1.50 | <a href="#">285855</a> | RPL7L1   | ribosomal protein L7-like 1                                        |

|          |       |                        |          |                                                                                |
|----------|-------|------------------------|----------|--------------------------------------------------------------------------------|
| TTC4     | -1.50 | <a href="#">7268</a>   | TTC4     | tetratricopeptide repeat domain 4                                              |
| TRFP     | -1.50 | <a href="#">9477</a>   | TRFP     | (Drosophila)                                                                   |
| WEE1     | -1.50 | <a href="#">7465</a>   | WEE1     | WEE1 homolog (S. pombe)                                                        |
| C21ORF70 | -1.51 | <a href="#">85395</a>  | C21ORF70 | chromosome 21 open reading frame 70                                            |
| COX6B1   | -1.51 | <a href="#">1340</a>   | COX6B1   | cytochrome c oxidase subunit Vib polypeptide 1 (ubiquitous)                    |
| FHL2     | -1.51 | <a href="#">2274</a>   | FHL2     | four and a half LIM domains 2                                                  |
| HEBP1    | -1.51 | <a href="#">50865</a>  | HEBP1    | heme binding protein 1                                                         |
| MDH1     | -1.51 | <a href="#">4190</a>   | MDH1     | malate dehydrogenase 1, NAD (soluble)                                          |
| 6        | -1.51 | <a href="#">10200</a>  | MPHOSPH6 | M-phase phosphoprotein 6                                                       |
| PURB     | -1.51 | <a href="#">5814</a>   | PURB     | purine-rich element binding protein B                                          |
| RNUXA    | -1.51 | <a href="#">51808</a>  | RNUXA    | RNA U, small nuclear RNA export adaptor (phosphorylation regulated)            |
| TRIP4    | -1.51 | <a href="#">9325</a>   | TRIP4    | thyroid hormone receptor interactor 4                                          |
| ZCCHC9   | -1.51 | <a href="#">84240</a>  | ZCCHC9   | zinc finger, CCHC domain containing 9                                          |
| ACP6     | -1.52 | <a href="#">51205</a>  | ACP6     | acid phosphatase 6, lysophosphatidic                                           |
| ARPC5    | -1.52 | <a href="#">10092</a>  | ARPC5    | actin related protein 2/3 complex, subunit 5, 16kDa                            |
| BLES03   | -1.52 | <a href="#">83638</a>  | C11orf68 | chromosome 11 open reading frame 68                                            |
| GNE      | -1.52 | <a href="#">10020</a>  | GNE      | kinase                                                                         |
| IMPDH2   | -1.52 | <a href="#">3615</a>   | IMPDH2   | IMP (inosine monophosphate) dehydrogenase 2                                    |
| MRPL1    | -1.52 | <a href="#">65008</a>  | MRPL1    | mitochondrial ribosomal protein L1                                             |
| NDUFA7   | -1.52 | <a href="#">4701</a>   | NDUFA7   | NADH dehydrogenase (ubiquinone) 1 alpha subcomplex, 7, 14.5kDa                 |
| RPS21    | -1.52 | <a href="#">6227</a>   | RPS21    | ribosomal protein S21                                                          |
| TIMM9    | -1.52 | <a href="#">26520</a>  | TIMM9    | translocase of inner mitochondrial membrane 9 homolog (yeast)                  |
| TOMM7    | -1.52 | <a href="#">54543</a>  | TOMM7    | translocase of outer mitochondrial membrane 7 homolog (yeast)                  |
| CD55     | -1.53 | <a href="#">1604</a>   | CD55     | blood group)                                                                   |
| EIF4A2   | -1.53 | <a href="#">1974</a>   | EIF4A2   | eukaryotic translation initiation factor 4A, isoform 2                         |
| KIAA0101 | -1.53 | <a href="#">9768</a>   | KIAA0101 | KIAA0101                                                                       |
| MAP3K7   | -1.53 | <a href="#">6885</a>   | MAP3K7   | mitogen-activated protein kinase kinase kinase 7                               |
| MIMITIN  | -1.53 | <a href="#">91942</a>  | NDUFAF2  | factor 2                                                                       |
| NIP7     | -1.53 | <a href="#">51388</a>  | NIP7     | nuclear import 7 homolog (S. cerevisiae)                                       |
| PHF14    | -1.53 | <a href="#">9678</a>   | PHF14    | PHD finger protein 14                                                          |
| RPS13    | -1.53 | <a href="#">6207</a>   | RPS13    | ribosomal protein S13                                                          |
| TIPRL    | -1.53 | <a href="#">261726</a> | TIPRL    | TIP41, TOR signalling pathway regulator-like (S. cerevisiae)                   |
| ZFAND1   | -1.53 | <a href="#">79752</a>  | ZFAND1   | zinc finger, AN1-type domain 1                                                 |
| ANXA2    | -1.54 | <a href="#">302</a>    | ANXA2    | annexin A2                                                                     |
| ATP5H    | -1.54 | <a href="#">10476</a>  | ATP5H    | ATP synthase, H <sup>+</sup> transporting, mitochondrial F0 complex, subunit d |
| ATP5I    | -1.54 | <a href="#">521</a>    | ATP5I    | ATP synthase, H <sup>+</sup> transporting, mitochondrial F0 complex, subunit E |
| BCL2L1   | -1.54 | <a href="#">598</a>    | BCL2L1   | BCL2-like 1                                                                    |
| C12ORF11 | -1.54 | <a href="#">55726</a>  | C12orf11 | chromosome 12 open reading frame 11                                            |
| C6ORF125 | -1.54 | <a href="#">84300</a>  | C6orf125 | chromosome 6 open reading frame 125                                            |
| FAF1     | -1.54 | <a href="#">11124</a>  | FAF1     | Fas (TNFRSF6) associated factor 1                                              |
| GFM1     | -1.54 | <a href="#">85476</a>  | GFM1     | G elongation factor, mitochondrial 1                                           |
| LSM5     | -1.54 | <a href="#">23658</a>  | LSM5     | LSM5 homolog, U6 small nuclear RNA associated (S. cerevisiae)                  |
| OBFC1    | -1.54 | <a href="#">79991</a>  | OBFC1    | oligonucleotide/oligosaccharide-binding fold containing 1                      |
| SUGT1    | -1.54 | <a href="#">10910</a>  | SUGT1    | SGT1, suppressor of G2 allele of SKP1 (S. cerevisiae)                          |
| GALE     | -1.54 | <a href="#">2582</a>   | GALE     | UDP-galactose-4-epimerase                                                      |
| ALDH1A3  | -1.55 | <a href="#">220</a>    | ALDH1A3  | aldehyde dehydrogenase 1 family, member A3                                     |



|           |       |                        |          |                                                                           |
|-----------|-------|------------------------|----------|---------------------------------------------------------------------------|
| CD24      | -1.55 | <a href="#">934</a>    | CD24     | CD24 molecule                                                             |
| DCAKD     | -1.55 | <a href="#">79877</a>  | DCAKD    | dephospho-CoA kinase domain containing                                    |
| EDF1      | -1.55 | <a href="#">8721</a>   | EDF1     | endothelial differentiation-related factor 1                              |
| IL6       | -1.55 | <a href="#">3569</a>   | IL6      | interleukin 6 (interferon, beta 2)                                        |
| KPNA3     | -1.55 | <a href="#">3839</a>   | KPNA3    | karyopherin alpha 3 (importin alpha 4)                                    |
| STOML2    | -1.55 | <a href="#">30968</a>  | STOML2   | stomatin (EPB72)-like 2                                                   |
| FAM82B    | -1.56 | <a href="#">51115</a>  | FAM82B   | family with sequence similarity 82, member B                              |
| IMMP2L    | -1.56 | <a href="#">83943</a>  | IMMP2L   | IMP2 inner mitochondrial membrane peptidase-like ( <i>S. cerevisiae</i> ) |
| MELK      | -1.56 | <a href="#">9833</a>   | MELK     | maternal embryonic leucine zipper kinase                                  |
| NOLA2     | -1.56 | <a href="#">55651</a>  | NOLA2    | nucleolar protein family A, member 2 (H/ACA small nucleolar RNPs)         |
| POLE4     | -1.56 | <a href="#">56655</a>  | POLE4    | polymerase (DNA-directed), epsilon 4 (p12 subunit)                        |
| PHB       | -1.56 | <a href="#">5245</a>   | PHB      | prohibitin                                                                |
| RPL39L    | -1.56 | <a href="#">116832</a> | RPL39L   | ribosomal protein L39-like                                                |
| TSNAX     | -1.56 | <a href="#">7257</a>   | TSNAX    | translin-associated factor X                                              |
| AFMID     | -1.57 | <a href="#">125061</a> | AFMID    | arylformamidase                                                           |
| C18ORF25  | -1.57 | <a href="#">389541</a> | C7orf59  | chromosome 7 open reading frame 59                                        |
| CXORF26   | -1.57 | <a href="#">51260</a>  | CXorf26  | chromosome X open reading frame 26                                        |
| HFL       | -1.57 | <a href="#">3078</a>   | CFHR1    | complement factor H-related 1                                             |
| MGC61571  | -1.57 | <a href="#">152100</a> | CMC1     | COX assembly mitochondrial protein homolog ( <i>S. cerevisiae</i> )       |
| FAM82C    | -1.57 | <a href="#">55177</a>  | FAM82C   | family with sequence similarity 82, member C                              |
| ICT1      | -1.57 | <a href="#">3396</a>   | ICT1     | immature colon carcinoma transcript 1                                     |
| ISOC1     | -1.57 | <a href="#">51015</a>  | ISOC1    | isochorismatase domain containing 1                                       |
| LASS2     | -1.57 | <a href="#">29956</a>  | LASS2    | LAG1 homolog, ceramide synthase 2 ( <i>S. cerevisiae</i> )                |
| GNPTAB    | -1.57 | <a href="#">79158</a>  | GNPTAB   | N-acetylglucosamine-1-phosphate transferase, alpha and beta subunits      |
| PPIH      | -1.57 | <a href="#">10465</a>  | PPIH     | peptidylprolyl isomerase H (cyclophilin H)                                |
| PCNP      | -1.57 | <a href="#">57092</a>  | PCNP     | PEST proteolytic signal containing nuclear protein                        |
| PDCL3     | -1.57 | <a href="#">79031</a>  | PDCL3    | phosducin-like 3                                                          |
| PFDN6     | -1.57 | <a href="#">10471</a>  | PFDN6    | prefoldin subunit 6                                                       |
| RHOB      | -1.57 | <a href="#">388</a>    | RHOB     | ras homolog gene family, member B                                         |
| APOBEC3B  | -1.58 | <a href="#">9582</a>   | APOBEC3B | apolipoprotein B mRNA editing enzyme, catalytic polypeptide-like 3B       |
| METTL3    | -1.58 | <a href="#">56339</a>  | METTL3   | methyltransferase like 3                                                  |
| NACA      | -1.58 | <a href="#">4666</a>   | NACA     | nascent-polypeptide-associated complex alpha polypeptide                  |
| NUP37     | -1.58 | <a href="#">79023</a>  | NUP37    | nucleoporin 37kDa                                                         |
| PPIB      | -1.58 | <a href="#">5479</a>   | PPIB     | peptidylprolyl isomerase B (cyclophilin B)                                |
| PRKRA     | -1.58 | <a href="#">8575</a>   | PRKRA    | activator                                                                 |
| RPL14     | -1.58 | <a href="#">9045</a>   | RPL14    | ribosomal protein L14                                                     |
| LOC389541 | -1.59 | <a href="#">389541</a> | C7orf59  | chromosome 7 open reading frame 59                                        |
| GLE1L     | -1.59 | <a href="#">2733</a>   | GLE1L    | GLE1 RNA export mediator-like (yeast)                                     |
| MRPS18C   | -1.59 | <a href="#">51023</a>  | MRPS18C  | mitochondrial ribosomal protein S18C                                      |
| NDUFA8    | -1.59 | <a href="#">4702</a>   | NDUFA8   | NADH dehydrogenase (ubiquinone) 1 alpha subcomplex, 8, 19kDa              |
| NSUN5     | -1.59 | <a href="#">55695</a>  | NSUN5    | NOL1/NOP2/Sun domain family, member 5                                     |
| TBC1D7    | -1.59 | <a href="#">51256</a>  | TBC1D7   | TBC1 domain family, member 7                                              |
| TOMM22    | -1.59 | <a href="#">56993</a>  | TOMM22   | translocase of outer mitochondrial membrane 22 homolog (yeast)            |
| APEX1     | -1.60 | <a href="#">328</a>    | APEX1    | APEX nuclease (multifunctional DNA repair enzyme) 1                       |
| CAV1      | -1.60 | <a href="#">857</a>    | CAV1     | caveolin 1, caveolae protein, 22kDa                                       |
| CCDC72    | -1.60 | <a href="#">51372</a>  | CCDC72   | coiled-coil domain containing 72                                          |

|           |       |                        |           |                                                                     |
|-----------|-------|------------------------|-----------|---------------------------------------------------------------------|
| MAGOH     | -1.60 | <a href="#">4116</a>   | MAGOH     | mago-nashi homolog, proliferation-associated (Drosophila)           |
| MNAT1     | -1.60 | <a href="#">4331</a>   | MNAT1     | menage a trois homolog 1, cyclin H assembly factor (Xenopus laevis) |
| MRPS30    | -1.60 | <a href="#">10884</a>  | MRPS30    | mitochondrial ribosomal protein S30                                 |
| MTIF2     | -1.60 | <a href="#">4528</a>   | MTIF2     | mitochondrial translational initiation factor 2                     |
| RBM22     | -1.60 | <a href="#">55696</a>  | RBM22     | RNA binding motif protein 22                                        |
| BOLA3     | -1.61 | <a href="#">388962</a> | BOLA3     | bolA homolog 3 (E. coli)                                            |
| CKLF      | -1.61 | <a href="#">51192</a>  | CKLF      | chemokine-like factor                                               |
| EBNA1BP2  | -1.61 | <a href="#">10969</a>  | EBNA1BP2  | EBNA1 binding protein 2                                             |
| EIF2A     | -1.61 | <a href="#">83939</a>  | EIF2A     | eukaryotic translation initiation factor 2A, 65kDa                  |
| GANAB     | -1.61 | <a href="#">23193</a>  | GANAB     | glucosidase, alpha; neutral AB                                      |
| C6ORF49   | -1.61 | <a href="#">29964</a>  | PRICKLE4  | ickle homolog 4 (Drosophila)                                        |
| RABEPK    | -1.61 | <a href="#">10244</a>  | RABEPK    | Rab9 effector protein with kelch motifs                             |
| RARS      | -1.62 | <a href="#">5917</a>   | RARS      | arginyl-tRNA synthetase                                             |
| ALG5      | -1.62 | <a href="#">29880</a>  | ALG5      | phosphate beta-glucosyltransferase)                                 |
| CBX1      | -1.62 | <a href="#">10951</a>  | CBX1      | chromobox homolog 1 (HP1 beta homolog Drosophila )                  |
| CPNE8     | -1.62 | <a href="#">144402</a> | CPNE8     | copine VIII                                                         |
| KRT19     | -1.62 | <a href="#">3880</a>   | KRT19     | keratin 19                                                          |
| MRPL9     | -1.62 | <a href="#">65005</a>  | MRPL9     | mitochondrial ribosomal protein L9                                  |
| NIT2      | -1.62 | <a href="#">56954</a>  | NIT2      | nitrilase family, member 2                                          |
| TRA16     | -1.62 | <a href="#">126382</a> | NR2C2AP   | nuclear receptor 2C2-associated protein                             |
| TM4SF1    | -1.62 | <a href="#">4071</a>   | TM4SF1    | transmembrane 4 L six family member 1                               |
| YWHAG     | -1.62 | <a href="#">7532</a>   | YWHAG     | protein, gamma polypeptide                                          |
| AHNAK     | -1.63 | <a href="#">79026</a>  | AHNAK     | AHNAK nucleoprotein (desmoyokin)                                    |
| BXDC1     | -1.63 | <a href="#">84154</a>  | BXDC1     | brix domain containing 1                                            |
| C7ORF11   | -1.63 | <a href="#">136647</a> | C7orf11   | chromosome 7 open reading frame 11                                  |
| C14ORF112 | -1.63 | <a href="#">51241</a>  | COX16     | COX16 cytochrome c oxidase assembly homolog (S. cerevisiae)         |
| FLJ14668  | -1.63 | <a href="#">84908</a>  | FAM136A   | family with sequence similarity 136, member A                       |
| FLJ14803  | -1.63 | <a href="#">84908</a>  | FAM136A   | family with sequence similarity 136, member A                       |
| MYADM     | -1.63 | <a href="#">91663</a>  | MYADM     | myeloid-associated differentiation marker                           |
| POLR2G    | -1.63 | <a href="#">5436</a>   | POLR2G    | polymerase (RNA) II (DNA directed) polypeptide G                    |
| WDSOF1    | -1.63 | <a href="#">25879</a>  | WDSOF1    | WD repeats and SOF1 domain containing                               |
| ZFP91     | -1.63 | <a href="#">80829</a>  | ZFP91     | zinc finger protein 91 homolog (mouse)                              |
| ZBED2     | -1.63 | <a href="#">79413</a>  | ZBED2     | zinc finger, BED-type containing 2                                  |
| C14ORF156 | -1.64 | <a href="#">81892</a>  | C14orf156 | chromosome 14 open reading frame 156                                |
| DSCR2     | -1.64 | <a href="#">8624</a>   | DSCR2     | Down syndrome critical region gene 2                                |
| MRPS31    | -1.64 | <a href="#">10240</a>  | MRPS31    | mitochondrial ribosomal protein S31                                 |
| NDUFB6    | -1.64 | <a href="#">4712</a>   | NDUFB6    | NADH dehydrogenase (ubiquinone) 1 beta subcomplex, 6, 17kDa         |
| PLSCR1    | -1.64 | <a href="#">5359</a>   | PLSCR1    | phospholipid scramblase 1                                           |
| PTD015    | -1.65 | <a href="#">28971</a>  | C11orf67  | chromosome 11 open reading frame 67                                 |
| EXOSC5    | -1.65 | <a href="#">56915</a>  | EXOSC5    | exosome component 5                                                 |
| SLC5A6    | -1.65 | <a href="#">8884</a>   | SLC5A6    | 6                                                                   |
| ATIC      | -1.66 | <a href="#">471</a>    | ATIC      | formyltransferase/IMP cyclohydrolase                                |
| ACTG1     | -1.66 | <a href="#">71</a>     | ACTG1     | actin, gamma 1                                                      |
| BAIAP2    | -1.66 | <a href="#">10458</a>  | BAIAP2    | BAI1-associated protein 2                                           |
| C11ORF48  | -1.66 | <a href="#">79081</a>  | C11ORF48  | chromosome 11 open reading frame 48                                 |
| DDX21     | -1.66 | <a href="#">9188</a>   | DDX21     | DEAD (Asp-Glu-Ala-Asp) box polypeptide 21                           |

|          |       |                        |          |                                                                    |
|----------|-------|------------------------|----------|--------------------------------------------------------------------|
| E2F4     | -1.66 | <a href="#">1874</a>   | E2F4     | E2F transcription factor 4, p107/p130-binding                      |
| MRPL51   | -1.66 | <a href="#">51258</a>  | MRPL51   | mitochondrial ribosomal protein L51                                |
| MRPS22   | -1.66 | <a href="#">56945</a>  | MRPS22   | mitochondrial ribosomal protein S22                                |
| NDUFB9   | -1.66 | <a href="#">4715</a>   | NDUFB9   | NADH dehydrogenase (ubiquinone) 1 beta subcomplex, 9, 22kDa        |
| PQLC3    | -1.66 | <a href="#">130814</a> | PQLC3    | PQ loop repeat containing 3                                        |
| CSNK1D   | -1.67 | <a href="#">1453</a>   | CSNK1D   | casein kinase 1, delta                                             |
| CSTB     | -1.67 | <a href="#">1476</a>   | CSTB     | cystatin B (stefin B)                                              |
| RPIA     | -1.67 | <a href="#">22934</a>  | RPIA     | ribose 5-phosphate isomerase A (ribose 5-phosphate epimerase)      |
| YIPF1    | -1.67 | <a href="#">54432</a>  | YIPF1    | Yip1 domain family, member 1                                       |
| ACN9     | -1.68 | <a href="#">57001</a>  | ACN9     | ACN9 homolog (S. cerevisiae)                                       |
| C12ORF10 | -1.68 | <a href="#">60314</a>  | C12ORF10 | chromosome 12 open reading frame 10                                |
| EIF2B2   | -1.68 | <a href="#">8892</a>   | EIF2B2   | eukaryotic translation initiation factor 2B, subunit 2 beta, 39kDa |
| GAL      | -1.68 | <a href="#">51083</a>  | GAL      | galanin                                                            |
| MRPL50   | -1.68 | <a href="#">54534</a>  | MRPL50   | mitochondrial ribosomal protein L50                                |
| RPL36AL  | -1.68 | <a href="#">6166</a>   | RPL36AL  | ribosomal protein L36a-like                                        |
| UIP1     | -1.69 | <a href="#">55559</a>  | HAUS7    | HAUS augmin-like complex, subunit 7                                |
| PGM2L1   | -1.69 | <a href="#">283209</a> | PGM2L1   | phosphoglucomutase 2-like 1                                        |
| RRS1     | -1.69 | <a href="#">23212</a>  | RRS1     | RRS1 ribosome biogenesis regulator homolog (S. cerevisiae)         |
| THYN1    | -1.69 | <a href="#">29087</a>  | THYN1    | thymocyte nuclear protein 1                                        |
| GLS      | -1.70 | <a href="#">2744</a>   | GLS      | glutaminase                                                        |
| UGT2B11  | -1.70 | <a href="#">10720</a>  | UGT2B11  | UDP glucuronosyltransferase 2 family, polypeptide B11              |
| ARD1A    | -1.71 | <a href="#">8260</a>   | ARD1A    | ARD1 homolog A, N-acetyltransferase (S. cerevisiae)                |
| BXDC2    | -1.71 | <a href="#">55299</a>  | BXDC2    | brix domain containing 2                                           |
| C21ORF25 | -1.71 | <a href="#">25966</a>  | C2CD2    | C2 calcium-dependent domain containing 2                           |
| MRPL21   | -1.71 | <a href="#">219927</a> | MRPL21   | mitochondrial ribosomal protein L21                                |
| PYGL     | -1.71 | <a href="#">5836</a>   | PYGL     | type VI)                                                           |
| PCSK5    | -1.71 | <a href="#">5125</a>   | PCSK5    | proprotein convertase subtilisin/kexin type 5                      |
| PSMB5    | -1.71 | <a href="#">5693</a>   | PSMB5    | proteasome (prosome, macropain) subunit, beta type, 5              |
| B4GALT4  | -1.71 | <a href="#">8702</a>   | B4GALT4  | UDP-Gal:betaGlcNAc beta 1,4- galactosyltransferase, polypeptide 4  |
| C1ORF181 | -1.71 | <a href="#">54680</a>  | ZNHIT6   | zinc finger, HIT type 6                                            |
| ADI1     | -1.72 | <a href="#">55256</a>  | ADI1     | acireductone dioxygenase 1                                         |
| DNM3     | -1.72 | <a href="#">26052</a>  | DNM3     | dynamamin 3                                                        |
| CNN3     | -1.73 | <a href="#">1266</a>   | CNN3     | calponin 3, acidic                                                 |
| CYCS     | -1.73 | <a href="#">54205</a>  | CYCS     | cytochrome c, somatic                                              |
| METTL5   | -1.73 | <a href="#">29081</a>  | METTL5   | methyltransferase like 5                                           |
| NOLA3    | -1.73 | <a href="#">55505</a>  | NOLA3    | nucleolar protein family A, member 3 (H/ACA small nucleolar RNPs)  |
| OSTF1    | -1.73 | <a href="#">26578</a>  | OSTF1    | osteoclast stimulating factor 1                                    |
| SH3BGR2  | -1.73 | <a href="#">83699</a>  | SH3BGR2  | SH3 domain binding glutamic acid-rich protein like 2               |
| VDAC2    | -1.73 | <a href="#">7417</a>   | VDAC2    | voltage-dependent anion channel 2                                  |
| CCDC23   | -1.74 | <a href="#">374969</a> | CCDC23   | coiled-coil domain containing 23                                   |
| GLO1     | -1.74 | <a href="#">2739</a>   | GLO1     | glyoxalase I                                                       |
| TMEM16A  | -1.74 | <a href="#">55107</a>  | TMEM16A  | transmembrane protein 16A                                          |
| UPK1B    | -1.74 | <a href="#">7348</a>   | UPK1B    | uroplakin 1B                                                       |
| COMMD1   | -1.75 | <a href="#">150684</a> | COMMD1   | copper metabolism (Murr1) domain containing 1                      |
| DEFB4    | -1.75 | <a href="#">1673</a>   | DEFB4    | defensin, beta 4                                                   |
| ITGB4BP  | -1.75 | <a href="#">3692</a>   | ITGB4BP  | integrin beta 4 binding protein                                    |

|           |       |                        |           |                                                                      |
|-----------|-------|------------------------|-----------|----------------------------------------------------------------------|
| LOC144363 | -1.75 | <a href="#">144363</a> | LYRM5     | LYR motif containing 5                                               |
| NDUFA12   | -1.75 | <a href="#">55967</a>  | NDUFA12   | NADH dehydrogenase (ubiquinone) 1 alpha subcomplex, 12               |
| P4HA2     | -1.75 | <a href="#">8974</a>   | P4HA2     | hydroxylase), alpha polypeptide II                                   |
| PCCB      | -1.76 | <a href="#">5096</a>   | PCCB      | propionyl Coenzyme A carboxylase, beta polypeptide                   |
| CXCR4     | -1.77 | <a href="#">7852</a>   | CXCR4     | chemokine (C-X-C motif) receptor 4                                   |
| DRG1      | -1.77 | <a href="#">4733</a>   | DRG1      | developmentally regulated GTP binding protein 1                      |
| GLDC      | -1.77 | <a href="#">2731</a>   | GLDC      | glycine dehydrogenase (decarboxylating)                              |
| LOC144501 | -1.77 | <a href="#">144501</a> | KRT80     | keratin 80                                                           |
| PLEC1     | -1.77 | <a href="#">5339</a>   | PLEC1     | plectin 1, intermediate filament binding protein 500kDa              |
| PDCD2     | -1.77 | <a href="#">5134</a>   | PDCD2     | programmed cell death 2                                              |
| MRPL33    | -1.78 | <a href="#">9553</a>   | MRPL33    | mitochondrial ribosomal protein L33                                  |
| CHCHD4    | -1.79 | <a href="#">131474</a> | CHCHD4    | coiled-coil-helix-coiled-coil-helix domain containing 4              |
| KCNS1     | -1.79 | <a href="#">3787</a>   | KCNS1     | member 1                                                             |
| PSMA6     | -1.79 | <a href="#">5687</a>   | PSMA6     | proteasome (prosome, macropain) subunit, alpha type, 6               |
| MKRN2     | -1.80 | <a href="#">23609</a>  | MKRN2     | makorin, ring finger protein, 2                                      |
| MRPL48    | -1.80 | <a href="#">51642</a>  | MRPL48    | mitochondrial ribosomal protein L48                                  |
| C14ORF2   | -1.81 | <a href="#">9556</a>   | C14orf2   | chromosome 14 open reading frame 2                                   |
| DCBLD2    | -1.81 | <a href="#">131566</a> | DCBLD2    | discoidin, CUB and LCCL domain containing 2                          |
| MRPL22    | -1.81 | <a href="#">29093</a>  | MRPL22    | mitochondrial ribosomal protein L22                                  |
| SF3B5     | -1.81 | <a href="#">83443</a>  | SF3B5     | splicing factor 3b, subunit 5, 10kDa                                 |
| CLEC2D    | -1.82 | <a href="#">29121</a>  | CLEC2D    | C-type lectin domain family 2, member D                              |
| EIF3S7    | -1.82 | <a href="#">8664</a>   | EIF3S7    | eukaryotic translation initiation factor 3, subunit 7 zeta, 66/67kDa |
| PMPCB     | -1.82 | <a href="#">9512</a>   | PMPCB     | peptidase (mitochondrial processing) beta                            |
| PA2G4     | -1.82 | <a href="#">5036</a>   | PA2G4     | proliferation-associated 2G4, 38kDa                                  |
| A         | -1.82 | <a href="#">51330</a>  | TNFRSF12A | tumor necrosis factor receptor superfamily, member 12A               |
| ANXA1     | -1.84 | <a href="#">301</a>    | ANXA1     | annexin A1                                                           |
| RPS15     | -1.84 | <a href="#">6209</a>   | RPS15     | ribosomal protein S15                                                |
| UGT2B7    | -1.84 | <a href="#">7364</a>   | UGT2B7    | UDP glucuronosyltransferase 2 family, polypeptide B7                 |
| ALDH7A1   | -1.85 | <a href="#">501</a>    | ALDH7A1   | aldehyde dehydrogenase 7 family, member A1                           |
| EXOSC3    | -1.85 | <a href="#">51010</a>  | EXOSC3    | exosome component 3                                                  |
| SRPR      | -1.85 | <a href="#">6734</a>   | SRPR      | signal recognition particle receptor ('docking protein')             |
| C1QBP     | -1.87 | <a href="#">708</a>    | C1QBP     | complement component 1, q subcomponent binding protein               |
| IRF8      | -1.87 | <a href="#">3394</a>   | IRF8      | interferon regulatory factor 8                                       |
| GTF2E2    | -1.88 | <a href="#">2961</a>   | GTF2E2    | general transcription factor IIE, polypeptide 2, beta 34kDa          |
| RPL24     | -1.88 | <a href="#">6152</a>   | RPL24     | ribosomal protein L24                                                |
| UQCRC2    | -1.88 | <a href="#">7385</a>   | UQCRC2    | ubiquinol-cytochrome c reductase core protein II                     |
| CAV2      | -1.89 | <a href="#">858</a>    | CAV2      | caveolin 2                                                           |
| S100A10   | -1.89 | <a href="#">6281</a>   | S100A10   | S100 calcium binding protein A10                                     |
| CDC23     | -1.90 | <a href="#">8697</a>   | CDC23     | CDC23 (cell division cycle 23, yeast, homolog)                       |
| POLR3C    | -1.90 | <a href="#">10623</a>  | POLR3C    | polymerase (RNA) III (DNA directed) polypeptide C (62kD)             |
| ZMPSTE24  | -1.90 | <a href="#">10269</a>  | ZMPSTE24  | zinc metallopeptidase (STE24 homolog, yeast)                         |
| ANXA3     | -1.91 | <a href="#">306</a>    | ANXA3     | annexin A3                                                           |
| C3ORF26   | -1.91 | <a href="#">84319</a>  | C3orf26   | chromosome 3 open reading frame 26                                   |
| COL4A2    | -1.91 | <a href="#">1284</a>   | COL4A2    | collagen, type IV, alpha 2                                           |
| SNRPF     | -1.91 | <a href="#">6636</a>   | SNRPF     | small nuclear ribonucleoprotein polypeptide F                        |
| STAMPB    | -1.91 | <a href="#">10617</a>  | STAMPB    | STAM binding protein                                                 |

|           |       |                        |           |                                                                     |
|-----------|-------|------------------------|-----------|---------------------------------------------------------------------|
| SDHD      | -1.91 | <a href="#">6392</a>   | SDHD      | protein                                                             |
| CTSL2     | -1.92 | <a href="#">1515</a>   | CTSL2     | cathepsin L2                                                        |
| CTHRC1    | -1.92 | <a href="#">115908</a> | CTHRC1    | collagen triple helix repeat containing 1                           |
| DUSP3     | -1.92 | <a href="#">1845</a>   | DUSP3     | related)                                                            |
| GTF2H5    | -1.93 | <a href="#">404672</a> | GTF2H5    | general transcription factor IIH, polypeptide 5                     |
| PLAC8     | -1.93 | <a href="#">51316</a>  | PLAC8     | placenta-specific 8                                                 |
| TOMM20    | -1.93 | <a href="#">9804</a>   | TOMM20    | translocase of outer mitochondrial membrane 20 homolog (yeast)      |
| VBP1      | -1.93 | <a href="#">7411</a>   | VBP1      | von Hippel-Lindau binding protein 1                                 |
| LSM3      | -1.94 | <a href="#">27258</a>  | LSM3      | LSM3 homolog, U6 small nuclear RNA associated (S. cerevisiae)       |
| PTRF      | -1.94 | <a href="#">284119</a> | PTRF      | polymerase I and transcript release factor                          |
| EIF2B1    | -1.97 | <a href="#">1967</a>   | EIF2B1    | eukaryotic translation initiation factor 2B, subunit 1 alpha, 26kDa |
| C9ORF46   | -1.98 | <a href="#">55848</a>  | C9orf46   | chromosome 9 open reading frame 46                                  |
| LAMA3     | -1.99 | <a href="#">3909</a>   | LAMA3     | laminin, alpha 3                                                    |
| QPRT      | -2.01 | <a href="#">23475</a>  | QPRT      | pyrophosphorylase (carboxylating))                                  |
| BCAT2     | -2.02 | <a href="#">587</a>    | BCAT2     | branched chain aminotransferase 2, mitochondrial                    |
| MRPL39    | -2.02 | <a href="#">54148</a>  | MRPL39    | mitochondrial ribosomal protein L39                                 |
| ATP5G1    | -2.03 | <a href="#">516</a>    | ATP5G1    | (subunit 9)                                                         |
| RPP40     | -2.03 | <a href="#">10799</a>  | RPP40     | ribonuclease P 40kDa subunit                                        |
| ZMYM6     | -2.05 | <a href="#">9204</a>   | ZMYM6     | zinc finger, MYM-type 6                                             |
| C1ORF57   | -2.16 | <a href="#">84284</a>  | C1orf57   | chromosome 1 open reading frame 57                                  |
| DPM3      | -2.17 | <a href="#">54344</a>  | DPM3      | dolichyl-phosphate mannosyltransferase polypeptide 3                |
| NNMT      | -2.17 | <a href="#">4837</a>   | NNMT      | nicotinamide N-methyltransferase                                    |
| TSPAN12   | -2.23 | <a href="#">23554</a>  | TSPAN12   | tetraspanin 12                                                      |
| FLG       | -2.26 | <a href="#">2312</a>   | FLG       | filaggrin                                                           |
| SCEL      | -2.26 | <a href="#">8796</a>   | SCEL      | sciellin                                                            |
| LIMA1     | -2.30 | <a href="#">51474</a>  | LIMA1     | LIM domain and actin binding 1                                      |
| RSL1D1    | -2.30 | <a href="#">26156</a>  | RSL1D1    | ribosomal L1 domain containing 1                                    |
| RPL34     | -2.30 | <a href="#">6164</a>   | RPL34     | ribosomal protein L34                                               |
| MGC20255  | -2.33 | <a href="#">90324</a>  | CCDC97    | coiled-coil domain containing 97                                    |
| C10ORF42  | -2.34 | <a href="#">90550</a>  | CCDC109A  | coiled-coil domain containing 109A                                  |
| MRPS17    | -2.36 | <a href="#">51373</a>  | MRPS17    | mitochondrial ribosomal protein S17                                 |
| LTA4H     | -2.37 | <a href="#">4048</a>   | LTA4H     | leukotriene A4 hydrolase                                            |
| RPL29     | -2.40 | <a href="#">6159</a>   | RPL29     | ribosomal protein L29                                               |
| MRPL40    | -2.41 | <a href="#">64976</a>  | MRPL40    | mitochondrial ribosomal protein L40                                 |
| RPS7      | -2.54 | <a href="#">6201</a>   | RPS7      | ribosomal protein S7                                                |
| FOSL1     | -2.57 | <a href="#">8061</a>   | FOSL1     | FOS-like antigen 1                                                  |
| FAM79A    | -2.59 | <a href="#">127262</a> | FAM79A    | family with sequence similarity 79, member A                        |
| CCNA1     | -2.62 | <a href="#">8900</a>   | CCNA1     | cyclin A1                                                           |
| CTGF      | -2.63 | <a href="#">1490</a>   | CTGF      | connective tissue growth factor                                     |
| FOLR3     | -2.65 | <a href="#">2352</a>   | FOLR3     | folate receptor 3 (gamma)                                           |
| MRPS15    | -2.73 | <a href="#">64960</a>  | MRPS15    | mitochondrial ribosomal protein S15                                 |
| TNFSF5IP1 | -2.80 | <a href="#">56984</a>  | TNFSF5IP1 | tumor necrosis factor superfamily, member 5-induced protein 1       |
| SYTL2     | -2.81 | <a href="#">54843</a>  | SYTL2     | synaptotagmin-like 2                                                |
| PRSS23    | -2.90 | <a href="#">11098</a>  | PRSS23    | protease, serine, 23                                                |
| SF3B14    | -2.92 | <a href="#">51639</a>  | SF3B14    | splicing factor 3B, 14 kDa subunit                                  |
| TINAGL1   | -2.94 | <a href="#">64129</a>  | TINAGL1   | tubulointerstitial nephritis antigen-like 1                         |

|                                         |             |                        |               |                                                                        |
|-----------------------------------------|-------------|------------------------|---------------|------------------------------------------------------------------------|
| TPK1                                    | -2.97       | <a href="#">27010</a>  | TPK1          | thiamin pyrophosphokinase 1                                            |
| RRAS2                                   | -2.99       | <a href="#">22800</a>  | RRAS2         | related RAS viral (r-ras) oncogene homolog 2                           |
| FLJ20625                                | -3.11       | <a href="#">55004</a>  | C11orf59      | chromosome 11 open reading frame 59                                    |
| TINP1                                   | -3.95       | <a href="#">10412</a>  | NSA2          | NSA2 ribosome biogenesis homolog (S. cerevisiae)                       |
| NMU                                     | -5.74       | <a href="#">10874</a>  | NMU           | neuromedin U                                                           |
| CLDN7                                   | -6.97       | <a href="#">1366</a>   | CLDN7         | claudin 7                                                              |
|                                         |             |                        |               |                                                                        |
|                                         |             |                        |               |                                                                        |
| <b>Significant gene list in OVCA420</b> |             |                        |               |                                                                        |
|                                         |             |                        |               |                                                                        |
| <b>Input ID</b>                         | <b>Fold</b> | <b>Gene ID</b>         | <b>Symbol</b> | <b>Name</b>                                                            |
| CX3CL1                                  | 3.44        | <a href="#">6376</a>   | CX3CL1        | chemokine (C-X3-C motif) ligand 1                                      |
| PANX2                                   | 3.36        | <a href="#">56666</a>  | PANX2         | pannexin 2                                                             |
| SLC25A22                                | 3.18        | <a href="#">79751</a>  | SLC25A22      | solute carrier family 25 (mitochondrial carrier: glutamate), member 22 |
| MRPL36                                  | 3.06        | <a href="#">64979</a>  | MRPL36        | mitochondrial ribosomal protein L36                                    |
| APLP2                                   | 3.02        | <a href="#">334</a>    | APLP2         | amyloid beta (A4) precursor-like protein 2                             |
| DKK1                                    | 2.87        | <a href="#">22943</a>  | DKK1          | dickkopf homolog 1 (Xenopus laevis)                                    |
| AGPAT5                                  | 2.80        | <a href="#">55326</a>  | AGPAT5        | acyltransferase, epsilon)                                              |
| NRG1                                    | 2.69        | <a href="#">3084</a>   | NRG1          | neuregulin 1                                                           |
| IL8                                     | 2.66        | <a href="#">3576</a>   | IL8           | interleukin 8                                                          |
| NDRG4                                   | 2.61        | <a href="#">65009</a>  | NDRG4         | NDRG family member 4                                                   |
| HRASLS3                                 | 2.58        | <a href="#">11145</a>  | HRASLS3       | HRAS-like suppressor 3                                                 |
| FADS3                                   | 2.53        | <a href="#">3995</a>   | FADS3         | fatty acid desaturase 3                                                |
| LYSMD2                                  | 2.48        | <a href="#">256586</a> | LYSMD2        | LysM, putative peptidoglycan-binding, domain containing 2              |
| PPP2R2C                                 | 2.47        | <a href="#">5522</a>   | PPP2R2C       | gamma isoform                                                          |
| LOC203547                               | 2.45        | <a href="#">203547</a> | VMA21         | VMA21 vacuolar H <sup>+</sup> -ATPase homolog (S. cerevisiae)          |
| TMCO1                                   | 2.43        | <a href="#">54499</a>  | TMCO1         | transmembrane and coiled-coil domains 1                                |
| DNAJB6                                  | 2.41        | <a href="#">10049</a>  | DNAJB6        | DnaJ (Hsp40) homolog, subfamily B, member 6                            |
| NUDT21                                  | 2.40        | <a href="#">11051</a>  | NUDT21        | nudix (nucleoside diphosphate linked moiety X)-type motif 21           |
| C1S                                     | 2.36        | <a href="#">716</a>    | C1S           | complement component 1, s subcomponent                                 |
| MAP1LC3B                                | 2.34        | <a href="#">81631</a>  | MAP1LC3B      | microtubule-associated protein 1 light chain 3 beta                    |
| SCARB1                                  | 2.34        | <a href="#">949</a>    | SCARB1        | scavenger receptor class B, member 1                                   |
| EEF1A2                                  | 2.29        | <a href="#">1917</a>   | EEF1A2        | eukaryotic translation elongation factor 1 alpha 2                     |
| A01247                                  | 2.27        | <a href="#">22998</a>  | LIMCH1        | LIM and calponin homology domains 1                                    |
| ZCCHC14                                 | 2.27        | <a href="#">23174</a>  | ZCCHC14       | zinc finger, CCHC domain containing 14                                 |
| RKHD1                                   | 2.26        | <a href="#">399664</a> | RKHD1         | ring finger and KH domain containing 1                                 |
| F5                                      | 2.23        | <a href="#">2153</a>   | F5            | coagulation factor V (proaccelerin, labile factor)                     |
| RNF149                                  | 2.23        | <a href="#">284996</a> | RNF149        | ring finger protein 149                                                |
| ZNF614                                  | 2.23        | <a href="#">80110</a>  | ZNF614        | zinc finger protein 614                                                |
| PPIA                                    | 2.19        | <a href="#">5478</a>   | PPIA          | peptidylprolyl isomerase A (cyclophilin A)                             |
| PTPNS1                                  | 2.17        | <a href="#">140885</a> | SIRPA         | signal-regulatory protein alpha                                        |
| CXADR                                   | 2.15        | <a href="#">1525</a>   | CXADR         | coxsackie virus and adenovirus receptor                                |
| MAPK6                                   | 2.15        | <a href="#">5597</a>   | MAPK6         | mitogen-activated protein kinase 6                                     |
| SLC35B1                                 | 2.14        | <a href="#">10237</a>  | SLC35B1       | solute carrier family 35, member B1                                    |
| DNM1L                                   | 2.13        | <a href="#">10059</a>  | DNM1L         | dynamamin 1-like                                                       |
| SERP1                                   | 2.13        | <a href="#">27230</a>  | SERP1         | stress-associated endoplasmic reticulum protein 1                      |

|          |      |                        |          |                                                                 |
|----------|------|------------------------|----------|-----------------------------------------------------------------|
| C17ORF63 | 2.11 | <a href="#">55731</a>  | C17orf63 | chromosome 17 open reading frame 63                             |
| PHGDH    | 2.10 | <a href="#">26227</a>  | PHGDH    | phosphoglycerate dehydrogenase                                  |
| CKAP4    | 2.09 | <a href="#">10970</a>  | CKAP4    | cytoskeleton-associated protein 4                               |
| PLAU     | 2.09 | <a href="#">5328</a>   | PLAU     | plasminogen activator, urokinase                                |
| SET      | 2.09 | <a href="#">6418</a>   | SET      | SET translocation (myeloid leukemia-associated)                 |
| IMPAD1   | 2.08 | <a href="#">54928</a>  | IMPAD1   | inositol monophosphatase domain containing 1                    |
| SERPINB7 | 2.07 | <a href="#">8710</a>   | SERPINB7 | serpin peptidase inhibitor, clade B (ovalbumin), member 7       |
| NETO2    | 2.04 | <a href="#">81831</a>  | NETO2    | neuropilin (NRP) and tolloid (TLL)-like 2                       |
| GRINA    | 2.03 | <a href="#">2907</a>   | GRINA    | 1 (glutamate binding)                                           |
| MT1A     | 2.03 | <a href="#">4489</a>   | MT1A     | metallothionein 1A (functional)                                 |
| KIAA0152 | 2.02 | <a href="#">9761</a>   | KIAA0152 | KIAA0152                                                        |
| MT2A     | 2.02 | <a href="#">4502</a>   | MT2A     | metallothionein 2A                                              |
| RAN      | 2.02 | <a href="#">5901</a>   | RAN      | RAN, member RAS oncogene family                                 |
| FYCO1    | 2.01 | <a href="#">79443</a>  | FYCO1    | FYVE and coiled-coil domain containing 1                        |
| RAB6IP1  | 2.00 | <a href="#">23258</a>  | RAB6IP1  | RAB6 interacting protein 1                                      |
| SURF4    | 2.00 | <a href="#">6836</a>   | SURF4    | surfeit 4                                                       |
| GALGT    | 1.99 | <a href="#">124872</a> | B4GALNT2 | beta-1,4-N-acetyl-galactosaminyl transferase 2                  |
| DBN1     | 1.99 | <a href="#">1627</a>   | DBN1     | drebrin 1                                                       |
| SLC39A6  | 1.99 | <a href="#">25800</a>  | SLC39A6  | solute carrier family 39 (zinc transporter), member 6           |
| TEAD2    | 1.99 | <a href="#">8463</a>   | TEAD2    | TEA domain family member 2                                      |
| BTG3     | 1.98 | <a href="#">10950</a>  | BTG3     | BTG family, member 3                                            |
| OBFC2A   | 1.98 | <a href="#">64859</a>  | OBFC2A   | oligonucleotide/oligosaccharide-binding fold containing 2A      |
| CREG1    | 1.97 | <a href="#">8804</a>   | CREG1    | cellular repressor of E1A-stimulated genes 1                    |
| IFI16    | 1.95 | <a href="#">3428</a>   | IFI16    | interferon, gamma-inducible protein 16                          |
| TPP1     | 1.95 | <a href="#">1200</a>   | TPP1     | tripeptidyl peptidase I                                         |
| DDEF1    | 1.94 | <a href="#">50807</a>  | DDEF1    | development and differentiation enhancing factor 1              |
| MALL     | 1.94 | <a href="#">7851</a>   | MALL     | mal, T-cell differentiation protein-like                        |
| CA12     | 1.92 | <a href="#">771</a>    | CA12     | carbonic anhydrase XII                                          |
| HPRT1    | 1.92 | <a href="#">3251</a>   | HPRT1    | hypoxanthine phosphoribosyltransferase 1 (Lesch-Nyhan syndrome) |
| MT1X     | 1.92 | <a href="#">4501</a>   | MT1X     | metallothionein 1X                                              |
| ZFP36L1  | 1.92 | <a href="#">677</a>    | ZFP36L1  | zinc finger protein 36, C3H type-like 1                         |
| LAMB1    | 1.91 | <a href="#">3912</a>   | LAMB1    | laminin, beta 1                                                 |
| RSNL2    | 1.91 | <a href="#">79745</a>  | RSNL2    | restin-like 2                                                   |
| SERPINA3 | 1.91 | <a href="#">12</a>     | SERPINA3 | member 3                                                        |
| FSCN1    | 1.89 | <a href="#">6624</a>   | FSCN1    | purpuratus)                                                     |
| MET      | 1.89 | <a href="#">4233</a>   | MET      | met proto-oncogene (hepatocyte growth factor receptor)          |
| PRNP     | 1.88 | <a href="#">5621</a>   | PRNP     | Scheinker syndrome, fatal familial insomnia)                    |
| CDK6     | 1.87 | <a href="#">1021</a>   | CDK6     | cyclin-dependent kinase 6                                       |
| CBX2     | 1.86 | <a href="#">84733</a>  | CBX2     | chromobox homolog 2 (Pc class homolog, Drosophila)              |
| C3ORF21  | 1.86 | <a href="#">152002</a> | C3orf21  | chromosome 3 open reading frame 21                              |
| PKMYT1   | 1.86 | <a href="#">9088</a>   | PKMYT1   | protein kinase, membrane associated tyrosine/threonine 1        |
| E2F2     | 1.85 | <a href="#">1870</a>   | E2F2     | E2F transcription factor 2                                      |
| E        | 1.85 | <a href="#">27351</a>  | PPPDE2   | PPPDE peptidase domain containing 2                             |
| ANAPC1   | 1.83 | <a href="#">64682</a>  | ANAPC1   | anaphase promoting complex subunit 1                            |
| GPT2     | 1.83 | <a href="#">84706</a>  | GPT2     | glutamic pyruvate transaminase (alanine aminotransferase) 2     |
| KLHL21   | 1.83 | <a href="#">9903</a>   | KLHL21   | kelch-like 21 (Drosophila)                                      |

|          |      |                        |          |                                                                      |
|----------|------|------------------------|----------|----------------------------------------------------------------------|
| SERPINE2 | 1.83 | <a href="#">5270</a>   | SERPINE2 | inhibitor type 1), member 2                                          |
| SLC12A8  | 1.83 | <a href="#">84561</a>  | SLC12A8  | solute carrier family 12 (potassium/chloride transporters), member 8 |
| GALNT4   | 1.83 | <a href="#">8693</a>   | GALNT4   | acetylgalactosaminyltransferase 4 (GalNAc-T4)                        |
| GSR      | 1.82 | <a href="#">2936</a>   | GSR      | glutathione reductase                                                |
| NOP5     | 1.82 | <a href="#">51602</a>  | NOP58    | NOP58 ribonucleoprotein homolog (yeast)                              |
| ASNS     | 1.81 | <a href="#">440</a>    | ASNS     | asparagine synthetase                                                |
| GABPB2   | 1.80 | <a href="#">2553</a>   | GABPB2   | GA binding protein transcription factor, beta subunit 2              |
| PIK3R2   | 1.80 | <a href="#">5296</a>   | PIK3R2   | phosphoinositide-3-kinase, regulatory subunit 2 (p85 beta)           |
| PTPLA    | 1.79 | <a href="#">9200</a>   | PTPLA    | member A                                                             |
| SPIRE1   | 1.79 | <a href="#">56907</a>  | SPIRE1   | spire homolog 1 (Drosophila)                                         |
| STS      | 1.79 | <a href="#">412</a>    | STS      | steroid sulfatase (microsomal), arylsulfatase C, isozyme S           |
| DAZAP2   | 1.78 | <a href="#">9802</a>   | DAZAP2   | DAZ associated protein 2                                             |
| GULP1    | 1.78 | <a href="#">51454</a>  | GULP1    | GULP, engulfment adaptor PTB domain containing 1                     |
| CDK2AP1  | 1.77 | <a href="#">8099</a>   | CDK2AP1  | CDK2-associated protein 1                                            |
| CCL20    | 1.77 | <a href="#">6364</a>   | CCL20    | chemokine (C-C motif) ligand 20                                      |
| CCNG1    | 1.77 | <a href="#">900</a>    | CCNG1    | cyclin G1                                                            |
| FADS1    | 1.77 | <a href="#">3992</a>   | FADS1    | fatty acid desaturase 1                                              |
| NMD3     | 1.77 | <a href="#">51068</a>  | NMD3     | NMD3 homolog ( <i>S. cerevisiae</i> )                                |
| PSAT1    | 1.77 | <a href="#">29968</a>  | PSAT1    | phosphoserine aminotransferase 1                                     |
| SC65     | 1.77 | <a href="#">10609</a>  | SC65     | synaptonemal complex protein SC65                                    |
| WDR4     | 1.77 | <a href="#">10785</a>  | WDR4     | WD repeat domain 4                                                   |
| NLF2     | 1.76 | <a href="#">388125</a> | C2CD4B   | C2 calcium-dependent domain containing 4B                            |
| FBXO21   | 1.76 | <a href="#">23014</a>  | FBXO21   | F-box protein 21                                                     |
| LMBR1L   | 1.76 | <a href="#">55716</a>  | LMBR1L   | limb region 1 homolog (mouse)-like                                   |
| RAPGEF1  | 1.76 | <a href="#">2889</a>   | RAPGEF1  | Rap guanine nucleotide exchange factor (GEF) 1                       |
| S100A8   | 1.76 | <a href="#">6279</a>   | S100A8   | S100 calcium binding protein A8                                      |
| PRSS15   | 1.75 | <a href="#">9361</a>   | LONP1    | lon peptidase 1, mitochondrial                                       |
| NRCAM    | 1.75 | <a href="#">4897</a>   | NRCAM    | neuronal cell adhesion molecule                                      |
| RNASEH1  | 1.75 | <a href="#">246243</a> | RNASEH1  | ribonuclease H1                                                      |
| UBE2D3   | 1.75 | <a href="#">7323</a>   | UBE2D3   | ubiquitin-conjugating enzyme E2D 3 (UBC4/5 homolog, yeast)           |
| BRPF3    | 1.74 | <a href="#">27154</a>  | BRPF3    | bromodomain and PHD finger containing, 3                             |
| FAM38A   | 1.74 | <a href="#">9780</a>   | FAM38A   | family with sequence similarity 38, member A                         |
| MLLT6    | 1.74 | <a href="#">4302</a>   | MLLT6    | <i>Drosophila</i> ); translocated to, 6                              |
| HMFN0839 | 1.73 | <a href="#">84803</a>  | AGPAT9   | 1-acylglycerol-3-phosphate O-acyltransferase 9                       |
| C9ORF30  | 1.73 | <a href="#">91283</a>  | C9ORF30  | chromosome 9 open reading frame 30                                   |
| CRY1     | 1.73 | <a href="#">1407</a>   | CRY1     | cryptochrome 1 (photolyase-like)                                     |
| MLLT11   | 1.73 | <a href="#">10962</a>  | MLLT11   | <i>Drosophila</i> ); translocated to, 11                             |
| TMEM38B  | 1.73 | <a href="#">55151</a>  | TMEM38B  | transmembrane protein 38B                                            |
| ZDHHC14  | 1.73 | <a href="#">79683</a>  | ZDHHC14  | zinc finger, DHHC-type containing 14                                 |
| HYOU1    | 1.72 | <a href="#">10525</a>  | HYOU1    | hypoxia up-regulated 1                                               |
| KLHDC5   | 1.72 | <a href="#">57542</a>  | KLHDC5   | kelch domain containing 5                                            |
| MLF2     | 1.72 | <a href="#">8079</a>   | MLF2     | myeloid leukemia factor 2                                            |
| FLJ31196 | 1.72 | <a href="#">146802</a> | SLC47A2  | solute carrier family 47, member 2                                   |
| TMCO3    | 1.72 | <a href="#">55002</a>  | TMCO3    | transmembrane and coiled-coil domains 3                              |
| TUBA1    | 1.72 | <a href="#">7277</a>   | TUBA1    | tubulin, alpha 1                                                     |
| TP73L    | 1.72 | <a href="#">8626</a>   | TP73L    | tumor protein p73-like                                               |



|          |      |                        |          |                                                                            |
|----------|------|------------------------|----------|----------------------------------------------------------------------------|
| RAF1     | 1.72 | <a href="#">5894</a>   | RAF1     | v-raf-1 murine leukemia viral oncogene homolog 1                           |
| WDR40A   | 1.72 | <a href="#">25853</a>  | WDR40A   | WD repeat domain 40A                                                       |
| WNT7A    | 1.72 | <a href="#">7476</a>   | WNT7A    | wingless-type MMTV integration site family, member 7A                      |
| BRD3     | 1.71 | <a href="#">8019</a>   | BRD3     | bromodomain containing 3                                                   |
| XPO5     | 1.71 | <a href="#">57510</a>  | XPO5     | exportin 5                                                                 |
| KRT20    | 1.71 | <a href="#">54474</a>  | KRT20    | keratin 20                                                                 |
| MAP2K1   | 1.71 | <a href="#">5604</a>   | MAP2K1   | mitogen-activated protein kinase kinase 1                                  |
| NPLOC4   | 1.71 | <a href="#">55666</a>  | NPLOC4   | nuclear protein localization 4 homolog ( <i>S. cerevisiae</i> )            |
| RAB7L1   | 1.71 | <a href="#">8934</a>   | RAB7L1   | RAB7, member RAS oncogene family-like 1                                    |
| C20ORF18 | 1.71 | <a href="#">10616</a>  | RBCK1    | RanBP-type and C3HC4-type zinc finger containing 1                         |
| SEC61A1  | 1.71 | <a href="#">29927</a>  | SEC61A1  | Sec61 alpha 1 subunit ( <i>S. cerevisiae</i> )                             |
| TOMM34   | 1.71 | <a href="#">10953</a>  | TOMM34   | translocase of outer mitochondrial membrane 34                             |
| WIPI1    | 1.71 | <a href="#">55062</a>  | WIPI1    | WD repeat domain, phosphoinositide interacting 1                           |
| CBS      | 1.70 | <a href="#">875</a>    | CBS      | cystathionine-beta-synthase                                                |
| FLOT2    | 1.70 | <a href="#">2319</a>   | FLOT2    | flotillin 2                                                                |
| LFNG     | 1.70 | <a href="#">3955</a>   | LFNG     | lunatic fringe homolog ( <i>Drosophila</i> )                               |
| IGF2BP2  | 1.69 | <a href="#">10644</a>  | IGF2BP2  | insulin-like growth factor 2 mRNA binding protein 2                        |
| RPS6KB1  | 1.69 | <a href="#">6198</a>   | RPS6KB1  | ribosomal protein S6 kinase, 70kDa, polypeptide 1                          |
| COL4A5   | 1.68 | <a href="#">1287</a>   | COL4A5   | collagen, type IV, alpha 5 (Alport syndrome)                               |
| NAP1L1   | 1.68 | <a href="#">4673</a>   | NAP1L1   | nucleosome assembly protein 1-like 1                                       |
| ZNF544   | 1.68 | <a href="#">27300</a>  | ZNF544   | zinc finger protein 544                                                    |
| EPHX1    | 1.67 | <a href="#">2052</a>   | EPHX1    | epoxide hydrolase 1, microsomal (xenobiotic)                               |
| RAC1     | 1.67 | <a href="#">5879</a>   | RAC1     | binding protein Rac1)                                                      |
| SDCCAG3  | 1.67 | <a href="#">10807</a>  | SDCCAG3  | serologically defined colon cancer antigen 3                               |
| WNT5A    | 1.67 | <a href="#">7474</a>   | WNT5A    | wingless-type MMTV integration site family, member 5A                      |
| FLJ11259 | 1.66 | <a href="#">55332</a>  | DRAM1    | DNA-damage regulated autophagy modulator 1                                 |
| LIMK1    | 1.66 | <a href="#">3984</a>   | LIMK1    | LIM domain kinase 1                                                        |
| RRAGA    | 1.66 | <a href="#">10670</a>  | RRAGA    | Ras-related GTP binding A                                                  |
| BAMBI    | 1.65 | <a href="#">25805</a>  | BAMBI    | BMP and activin membrane-bound inhibitor homolog ( <i>Xenopus laevis</i> ) |
| CLNS1A   | 1.65 | <a href="#">1207</a>   | CLNS1A   | chloride channel, nucleotide-sensitive, 1A                                 |
| CSK      | 1.65 | <a href="#">1445</a>   | CSK      | c-src tyrosine kinase                                                      |
| FECH     | 1.65 | <a href="#">2235</a>   | FECH     | ferrochelatase (protoporphyrin)                                            |
| FGFRL1   | 1.65 | <a href="#">53834</a>  | FGFRL1   | fibroblast growth factor receptor-like 1                                   |
| IGF2R    | 1.65 | <a href="#">3482</a>   | IGF2R    | insulin-like growth factor 2 receptor                                      |
| PIGM     | 1.65 | <a href="#">93183</a>  | PIGM     | phosphatidylinositol glycan anchor biosynthesis, class M                   |
| QSCN6L1  | 1.65 | <a href="#">169714</a> | QSCN6L1  | quiescin Q6-like 1                                                         |
| C6ORF85  | 1.65 | <a href="#">63027</a>  | SLC22A23 | solute carrier family 22, member 23                                        |
| ABCA1    | 1.64 | <a href="#">19</a>     | ABCA1    | ATP-binding cassette, sub-family A (ABC1), member 1                        |
| CTSH     | 1.64 | <a href="#">1512</a>   | CTSH     | cathepsin H                                                                |
| GJA1     | 1.64 | <a href="#">2697</a>   | GJA1     | gap junction protein, alpha 1, 43kDa (connexin 43)                         |
| HSPA8    | 1.64 | <a href="#">3312</a>   | HSPA8    | heat shock 70kDa protein 8                                                 |
| NINJ1    | 1.64 | <a href="#">4814</a>   | NINJ1    | ninjurin 1                                                                 |
| ARHGAP21 | 1.64 | <a href="#">57584</a>  | ARHGAP21 | Rho GTPase activating protein 21                                           |
| FJX1     | 1.63 | <a href="#">24147</a>  | FJX1     | four jointed box 1 ( <i>Drosophila</i> )                                   |
| SRPRB    | 1.63 | <a href="#">58477</a>  | SRPRB    | signal recognition particle receptor, B subunit                            |
| UGCG     | 1.63 | <a href="#">7357</a>   | UGCG     | UDP-glucose ceramide glucosyltransferase                                   |

|          |      |                        |          |                                                                  |
|----------|------|------------------------|----------|------------------------------------------------------------------|
| GIT1     | 1.62 | <a href="#">28964</a>  | GIT1     | G protein-coupled receptor kinase interactor 1                   |
| LARP6    | 1.62 | <a href="#">55323</a>  | LARP6    | La ribonucleoprotein domain family, member 6                     |
| ALDH2    | 1.61 | <a href="#">217</a>    | ALDH2    | aldehyde dehydrogenase 2 family (mitochondrial)                  |
| COL17A1  | 1.61 | <a href="#">1308</a>   | COL17A1  | collagen, type XVII, alpha 1                                     |
| SEPN1    | 1.61 | <a href="#">57190</a>  | SEPN1    | selenoprotein N, 1                                               |
| ST3GAL5  | 1.61 | <a href="#">8869</a>   | ST3GAL5  | ST3 beta-galactoside alpha-2,3-sialyltransferase 5               |
| ST13     | 1.61 | <a href="#">6767</a>   | ST13     | protein)                                                         |
| E2F3     | 1.60 | <a href="#">1871</a>   | E2F3     | E2F transcription factor 3                                       |
| FOXJ3    | 1.60 | <a href="#">22887</a>  | FOXJ3    | forkhead box J3                                                  |
| KIAA1434 | 1.60 | <a href="#">56261</a>  | GPCPD1   | cerevisiae)                                                      |
| GLT25D1  | 1.60 | <a href="#">79709</a>  | GLT25D1  | glycosyltransferase 25 domain containing 1                       |
| MTHFD1L  | 1.60 | <a href="#">25902</a>  | MTHFD1L  | methylenetetrahydrofolate dehydrogenase (NADP+ dependent) 1-like |
| MSN      | 1.60 | <a href="#">4478</a>   | MSN      | moesin                                                           |
| STT3A    | 1.60 | <a href="#">3703</a>   | STT3A    | cerevisiae)                                                      |
| TUBB     | 1.60 | <a href="#">203068</a> | TUBB     | tubulin, beta                                                    |
| ATP1B3   | 1.59 | <a href="#">483</a>    | ATP1B3   | ATPase, Na+/K+ transporting, beta 3 polypeptide                  |
| DDX39    | 1.59 | <a href="#">10212</a>  | DDX39    | DEAD (Asp-Glu-Ala-Asp) box polypeptide 39                        |
| DNASE2   | 1.59 | <a href="#">1777</a>   | DNASE2   | deoxyribonuclease II, lysosomal                                  |
| GTF3A    | 1.59 | <a href="#">2971</a>   | GTF3A    | general transcription factor IIIA                                |
| GM2A     | 1.59 | <a href="#">2760</a>   | GM2A     | GM2 ganglioside activator                                        |
| HNRPH1   | 1.59 | <a href="#">3187</a>   | HNRPH1   | heterogeneous nuclear ribonucleoprotein H1 (H)                   |
| ISG20L1  | 1.59 | <a href="#">64782</a>  | ISG20L1  | interferon stimulated exonuclease gene 20kDa-like 1              |
| SLC38A2  | 1.59 | <a href="#">54407</a>  | SLC38A2  | solute carrier family 38, member 2                               |
| VANGL2   | 1.59 | <a href="#">57216</a>  | VANGL2   | vang-like 2 (van gogh, Drosophila)                               |
| HRAS     | 1.59 | <a href="#">3265</a>   | HRAS     | v-Ha-ras Harvey rat sarcoma viral oncogene homolog               |
| CD47     | 1.58 | <a href="#">961</a>    | CD47     | CD47 molecule                                                    |
| CMKOR1   | 1.58 | <a href="#">57007</a>  | CXCR7    | chemokine (C-X-C motif) receptor 7                               |
| MGC14376 | 1.58 | <a href="#">84981</a>  | C17orf91 | chromosome 17 open reading frame 91                              |
| XPOT     | 1.58 | <a href="#">11260</a>  | XPOT     | exportin, tRNA (nuclear export receptor for tRNAs)               |
| RHOQ     | 1.58 | <a href="#">23433</a>  | RHOQ     | ras homolog gene family, member Q                                |
| SH3BP4   | 1.58 | <a href="#">23677</a>  | SH3BP4   | SH3-domain binding protein 4                                     |
| ZBED1    | 1.58 | <a href="#">9189</a>   | ZBED1    | zinc finger, BED-type containing 1                               |
| CEBPG    | 1.57 | <a href="#">1054</a>   | CEBPG    | CCAAT/enhancer binding protein (C/EBP), gamma                    |
| CLDN15   | 1.57 | <a href="#">24146</a>  | CLDN15   | claudin 15                                                       |
| C3ORF9   | 1.57 | <a href="#">56983</a>  | KTELC1   | KTEL (Lys-Tyr-Glu-Leu) containing 1                              |
| PVR      | 1.57 | <a href="#">5817</a>   | PVR      | poliovirus receptor                                              |
| PSTPIP2  | 1.57 | <a href="#">9050</a>   | PSTPIP2  | proline-serine-threonine phosphatase interacting protein 2       |
| RHOBTB3  | 1.57 | <a href="#">22836</a>  | RHOBTB3  | Rho-related BTB domain containing 3                              |
| UGT1A10  | 1.57 | <a href="#">54575</a>  | UGT1A10  | UDP glucuronosyltransferase 1 family, polypeptide A10            |
| ZNF609   | 1.57 | <a href="#">23060</a>  | ZNF609   | zinc finger protein 609                                          |
| RPRC1    | 1.56 | <a href="#">55700</a>  | RPRC1    | arginine/proline rich coiled-coil 1                              |
| E2F6     | 1.56 | <a href="#">1876</a>   | E2F6     | E2F transcription factor 6                                       |
| EXTL3    | 1.56 | <a href="#">2137</a>   | EXTL3    | exostoses (multiple)-like 3                                      |
| FAM104A  | 1.56 | <a href="#">84923</a>  | FAM104A  | family with sequence similarity 104, member A                    |
| JAG1     | 1.56 | <a href="#">182</a>    | JAG1     | jagged 1 (Alagille syndrome)                                     |
| MEA1     | 1.56 | <a href="#">4201</a>   | MEA1     | male-enhanced antigen 1                                          |

|          |      |                        |          |                                                            |
|----------|------|------------------------|----------|------------------------------------------------------------|
| POLR3H   | 1.56 | <a href="#">171568</a> | POLR3H   | polymerase (RNA) III (DNA directed) polypeptide H (22.9kD) |
| SMARCA4  | 1.56 | <a href="#">6597</a>   | SMARCA4  | chromatin, subfamily a, member 4                           |
| TBL1XR1  | 1.56 | <a href="#">79718</a>  | TBL1XR1  | transducin (beta)-like 1X-linked receptor 1                |
| TUBB2B   | 1.56 | <a href="#">347733</a> | TUBB2B   | tubulin, beta 2B                                           |
| C16ORF57 | 1.55 | <a href="#">79650</a>  | C16orf57 | chromosome 16 open reading frame 57                        |
| FLJ20186 | 1.55 | <a href="#">54849</a>  | DEF8     | differentially expressed in FDCEP 8 homolog (mouse)        |
| KIAA0427 | 1.55 | <a href="#">9811</a>   | KIAA0427 | KIAA0427                                                   |
| KIAA0690 | 1.55 | <a href="#">23223</a>  | KIAA0690 | KIAA0690                                                   |
| LACTB    | 1.55 | <a href="#">114294</a> | LACTB    | lactamase, beta                                            |
| PCSK1N   | 1.55 | <a href="#">27344</a>  | PCSK1N   | proprotein convertase subtilisin/kexin type 1 inhibitor    |
| TMEM123  | 1.55 | <a href="#">114908</a> | TMEM123  | transmembrane protein 123                                  |
| ZNF219   | 1.55 | <a href="#">51222</a>  | ZNF219   | zinc finger protein 219                                    |
| CIRH1A   | 1.54 | <a href="#">84916</a>  | CIRH1A   | cirrhosis, autosomal recessive 1A (cirhin)                 |
| HSPB8    | 1.54 | <a href="#">26353</a>  | HSPB8    | heat shock 22kDa protein 8                                 |
| ITGB6    | 1.54 | <a href="#">3694</a>   | ITGB6    | integrin, beta 6                                           |
| M6PR     | 1.54 | <a href="#">4074</a>   | M6PR     | mannose-6-phosphate receptor (cation dependent)            |
| PRCP     | 1.54 | <a href="#">5547</a>   | PRCP     | prolylcarboxypeptidase (angiotensinase C)                  |
| KIAA1688 | 1.54 | <a href="#">80728</a>  | ARHGAP39 | Rho GTPase activating protein 39                           |
| TOLLIP   | 1.54 | <a href="#">54472</a>  | TOLLIP   | toll interacting protein                                   |
| CREB3L2  | 1.53 | <a href="#">64764</a>  | CREB3L2  | cAMP responsive element binding protein 3-like 2           |
| CPNE8    | 1.53 | <a href="#">144402</a> | CPNE8    | copine VIII                                                |
| DKC1     | 1.53 | <a href="#">1736</a>   | DKC1     | dyskeratosis congenita 1, dyskerin                         |
| GPC1     | 1.53 | <a href="#">2817</a>   | GPC1     | glypican 1                                                 |
| NME4     | 1.53 | <a href="#">4833</a>   | NME4     | non-metastatic cells 4, protein expressed in               |
| RDH11    | 1.53 | <a href="#">51109</a>  | RDH11    | retinol dehydrogenase 11 (all-trans/9-cis/11-cis)          |
| SLC38A1  | 1.53 | <a href="#">81539</a>  | SLC38A1  | solute carrier family 38, member 1                         |
| TRAM2    | 1.53 | <a href="#">9697</a>   | TRAM2    | translocation associated membrane protein 2                |
| VAV2     | 1.53 | <a href="#">7410</a>   | VAV2     | vav 2 oncogene                                             |
| ZDHHC16  | 1.53 | <a href="#">84287</a>  | ZDHHC16  | zinc finger, DHHC-type containing 16                       |
| AP2M1    | 1.52 | <a href="#">1173</a>   | AP2M1    | adaptor-related protein complex 2, mu 1 subunit            |
| CALD1    | 1.52 | <a href="#">800</a>    | CALD1    | caldesmon 1                                                |
| HMOX1    | 1.52 | <a href="#">3162</a>   | HMOX1    | heme oxygenase (decycling) 1                               |
| ILF3     | 1.52 | <a href="#">3609</a>   | ILF3     | interleukin enhancer binding factor 3, 90kDa               |
| JARID2   | 1.52 | <a href="#">3720</a>   | JARID2   | jumonji, AT rich interactive domain 2                      |
| MAPRE3   | 1.52 | <a href="#">22924</a>  | MAPRE3   | microtubule-associated protein, RP/EB family, member 3     |
| NFE2L3   | 1.52 | <a href="#">9603</a>   | NFE2L3   | nuclear factor (erythroid-derived 2)-like 3                |
| PLEKHH3  | 1.52 | <a href="#">79990</a>  | PLEKHH3  | domain) member 3                                           |
| SLC35E1  | 1.52 | <a href="#">79939</a>  | SLC35E1  | solute carrier family 35, member E1                        |
| TSPAN7   | 1.52 | <a href="#">7102</a>   | TSPAN7   | tetraspanin 7                                              |
| TMEM113  | 1.52 | <a href="#">80335</a>  | TMEM113  | transmembrane protein 113                                  |
| TMEM9    | 1.52 | <a href="#">252839</a> | TMEM9    | transmembrane protein 9                                    |
| UBN1     | 1.52 | <a href="#">29855</a>  | UBN1     | ubiquitin 1                                                |
| ATG9A    | 1.51 | <a href="#">79065</a>  | ATG9A    | ATG9 autophagy related 9 homolog A (S. cerevisiae)         |
| ATRN     | 1.51 | <a href="#">8455</a>   | ATRN     | attractin                                                  |
| BID      | 1.51 | <a href="#">637</a>    | BID      | BH3 interacting domain death agonist                       |
| ITGAV    | 1.51 | <a href="#">3685</a>   | ITGAV    | CD51)                                                      |

|           |      |                        |           |                                                              |
|-----------|------|------------------------|-----------|--------------------------------------------------------------|
| NEO1      | 1.51 | <a href="#">4756</a>   | NEO1      | neogenin homolog 1 (chicken)                                 |
| NFIL3     | 1.51 | <a href="#">4783</a>   | NFIL3     | nuclear factor, interleukin 3 regulated                      |
| CHFR      | 1.50 | <a href="#">55743</a>  | CHFR      | checkpoint with forkhead and ring finger domains             |
| C22ORF16  | 1.50 | <a href="#">400916</a> | CHCHD10   | coiled-coil-helix-coiled-coil-helix domain containing 10     |
| FAM105B   | 1.50 | <a href="#">90268</a>  | FAM105B   | family with sequence similarity 105, member B                |
| GPD1L     | 1.50 | <a href="#">23171</a>  | GPD1L     | glycerol-3-phosphate dehydrogenase 1-like                    |
| LOC339344 | 1.50 | <a href="#">339344</a> | MYPOP     | Myb-related transcription factor, partner of profilin        |
| NOL6      | 1.50 | <a href="#">65083</a>  | NOL6      | nucleolar protein family 6 (RNA-associated)                  |
| PYGB      | 1.50 | <a href="#">5834</a>   | PYGB      | phosphorylase, glycogen; brain                               |
| PTPN23    | 1.50 | <a href="#">25930</a>  | PTPN23    | protein tyrosine phosphatase, non-receptor type 23           |
| RAI14     | 1.50 | <a href="#">26064</a>  | RAI14     | retinoic acid induced 14                                     |
| SNRPN     | 1.50 | <a href="#">6638</a>   | SNRPN     | small nuclear ribonucleoprotein polypeptide N                |
| SRP46     | 1.50 | <a href="#">10929</a>  | SFRS2B    | splicing factor, arginine/serine-rich 2B                     |
| SUPT4H1   | 1.50 | <a href="#">6827</a>   | SUPT4H1   | suppressor of Ty 4 homolog 1 ( <i>S. cerevisiae</i> )        |
| TNFAIP1   | 1.50 | <a href="#">7126</a>   | TNFAIP1   | tumor necrosis factor, alpha-induced protein 1 (endothelial) |
| ETS1      | 1.50 | <a href="#">2113</a>   | ETS1      | v-ets erythroblastosis virus E26 oncogene homolog 1 (avian)  |
| ABHD4     | 1.49 | <a href="#">63874</a>  | ABHD4     | abhydrolase domain containing 4                              |
| AKR1B1    | 1.49 | <a href="#">231</a>    | AKR1B1    | aldo-keto reductase family 1, member B1 (aldose reductase)   |
| CCNB1IP1  | 1.49 | <a href="#">57820</a>  | CCNB1IP1  | cyclin B1 interacting protein 1                              |
| LRPPRC    | 1.49 | <a href="#">10128</a>  | LRPPRC    | leucine-rich PPR-motif containing                            |
| LAPTM4B   | 1.49 | <a href="#">55353</a>  | LAPTM4B   | lysosomal protein transmembrane 4 beta                       |
| NOMO1     | 1.49 | <a href="#">23420</a>  | NOMO1     | NODAL modulator 1                                            |
| SNX5      | 1.49 | <a href="#">27131</a>  | SNX5      | sorting nexin 5                                              |
| SOX17     | 1.49 | <a href="#">64321</a>  | SOX17     | SRY (sex determining region Y)-box 17                        |
| ZDHHC23   | 1.49 | <a href="#">254887</a> | ZDHHC23   | zinc finger, DHHC-type containing 23                         |
| 11-Sep    | 1.49 | <a href="#">55752</a>  | 11-Sep    | septin 11                                                    |
| IQWD1     | 1.49 | <a href="#">55827</a>  | DCAF6     | DDB1 and CUL4 associated factor 6                            |
| RIP       | 1.49 | <a href="#">84268</a>  | RPAIN     | RPA interacting protein                                      |
| CLCN7     | 1.48 | <a href="#">1186</a>   | CLCN7     | chloride channel 7                                           |
| CHPT1     | 1.48 | <a href="#">56994</a>  | CHPT1     | choline phosphotransferase 1                                 |
| DNAJB2    | 1.48 | <a href="#">3300</a>   | DNAJB2    | DnaJ (Hsp40) homolog, subfamily B, member 2                  |
| GABARAPL  | 1.48 | <a href="#">23710</a>  | GABARAPL1 | GABA(A) receptor-associated protein like 1                   |
| HS1BP3    | 1.48 | <a href="#">64342</a>  | HS1BP3    | HCLS1 binding protein 3                                      |
| HEXB      | 1.48 | <a href="#">3074</a>   | HEXB      | hexosaminidase B (beta polypeptide)                          |
| PPP1R14B  | 1.48 | <a href="#">26472</a>  | PPP1R14B  | protein phosphatase 1, regulatory (inhibitor) subunit 14B    |
| PPP3R1    | 1.48 | <a href="#">5534</a>   | PPP3R1    | isoform                                                      |
| SERINC2   | 1.48 | <a href="#">347735</a> | SERINC2   | serine incorporator 2                                        |
| LYCAT     | 1.48 | <a href="#">253558</a> | LCLAT1    | lysocardiolipin acyltransferase 1                            |
| CAV1      | 1.47 | <a href="#">857</a>    | CAV1      | caveolin 1, caveolae protein, 22kDa                          |
| CDCA4     | 1.47 | <a href="#">55038</a>  | CDCA4     | cell division cycle associated 4                             |
| EPAS1     | 1.47 | <a href="#">2034</a>   | EPAS1     | endothelial PAS domain protein 1                             |
| FOXA2     | 1.47 | <a href="#">3170</a>   | FOXA2     | forkhead box A2                                              |
| NAGLU     | 1.47 | <a href="#">4669</a>   | NAGLU     | N-acetylglucosaminidase, alpha-                              |
| RAB15     | 1.47 | <a href="#">376267</a> | RAB15     | RAB15, member RAS oncogene family                            |
| RAD54L2   | 1.47 | <a href="#">23132</a>  | RAD54L2   | RAD54-like 2 ( <i>S. cerevisiae</i> )                        |
| SH3GL3    | 1.47 | <a href="#">6457</a>   | SH3GL3    | SH3-domain GRB2-like 3                                       |

|            |      |                        |          |                                                                |
|------------|------|------------------------|----------|----------------------------------------------------------------|
| SLC20A1    | 1.47 | <a href="#">6574</a>   | SLC20A1  | solute carrier family 20 (phosphate transporter), member 1     |
| THBS1      | 1.47 | <a href="#">7057</a>   | THBS1    | thrombospondin 1                                               |
| TTYH3      | 1.47 | <a href="#">80727</a>  | TTYH3    | tweety homolog 3 (Drosophila)                                  |
| UBE2O      | 1.47 | <a href="#">63893</a>  | UBE2O    | ubiquitin-conjugating enzyme E2O                               |
| ELL        | 1.46 | <a href="#">8178</a>   | ELL      | elongation factor RNA polymerase II                            |
| GTF2F2     | 1.46 | <a href="#">2963</a>   | GTF2F2   | general transcription factor IIF, polypeptide 2, 30kDa         |
| GNG10      | 1.46 | <a href="#">2790</a>   | GNG10    | guanine nucleotide binding protein (G protein), gamma 10       |
| MTA1       | 1.46 | <a href="#">9112</a>   | MTA1     | metastasis associated 1                                        |
| MFGE8      | 1.46 | <a href="#">4240</a>   | MFGE8    | milk fat globule-EGF factor 8 protein                          |
| ODC1       | 1.46 | <a href="#">4953</a>   | ODC1     | ornithine decarboxylase 1                                      |
| PHF12      | 1.46 | <a href="#">57649</a>  | PHF12    | PHD finger protein 12                                          |
| PODXL2     | 1.46 | <a href="#">50512</a>  | PODXL2   | podocalyxin-like 2                                             |
| PSME4      | 1.46 | <a href="#">23198</a>  | PSME4    | proteasome (prosome, macropain) activator subunit 4            |
| PUS7       | 1.46 | <a href="#">54517</a>  | PUS7     | pseudouridylate synthase 7 homolog (S. cerevisiae)             |
| PDXP       | 1.46 | <a href="#">57026</a>  | PDXP     | pyridoxal (pyridoxine, vitamin B6) phosphatase                 |
| RANGAP1    | 1.46 | <a href="#">5905</a>   | RANGAP1  | Ran GTPase activating protein 1                                |
| SLC25A19   | 1.46 | <a href="#">60386</a>  | SLC25A19 | carrier), member 19                                            |
| STOM       | 1.46 | <a href="#">2040</a>   | STOM     | stomatin                                                       |
| TAF2       | 1.46 | <a href="#">6873</a>   | TAF2     | associated factor, 150kDa                                      |
| TNPO2      | 1.46 | <a href="#">30000</a>  | TNPO2    | transportin 2                                                  |
| XPR1       | 1.46 | <a href="#">9213</a>   | XPR1     | xenotropic and polytropic retrovirus receptor                  |
| TMEM32     | 1.46 | <a href="#">93380</a>  | MMGT1    | membrane magnesium transporter 1                               |
| AES        | 1.45 | <a href="#">166</a>    | AES      | amino-terminal enhancer of split                               |
| AZIN1      | 1.45 | <a href="#">51582</a>  | AZIN1    | antizyme inhibitor 1                                           |
| CLCN3      | 1.45 | <a href="#">1182</a>   | CLCN3    | chloride channel 3                                             |
| DAZAP1     | 1.45 | <a href="#">26528</a>  | DAZAP1   | DAZ associated protein 1                                       |
| DDX55      | 1.45 | <a href="#">57696</a>  | DDX55    | DEAD (Asp-Glu-Ala-Asp) box polypeptide 55                      |
| DAP        | 1.45 | <a href="#">1611</a>   | DAP      | death-associated protein                                       |
| DYNLL2     | 1.45 | <a href="#">140735</a> | DYNLL2   | dynein, light chain, LC8-type 2                                |
| KIAA0319   | 1.45 | <a href="#">9856</a>   | KIAA0319 | KIAA0319                                                       |
| MBTPS1     | 1.45 | <a href="#">8720</a>   | MBTPS1   | membrane-bound transcription factor peptidase, site 1          |
| NIPA2      | 1.45 | <a href="#">81614</a>  | NIPA2    | non imprinted in Prader-Willi/Angelman syndrome 2              |
| WDR41      | 1.45 | <a href="#">55255</a>  | WDR41    | WD repeat domain 41                                            |
| C16ORF28   | 1.45 | <a href="#">64718</a>  | UNKL     | unkempt homolog (Drosophila)-like                              |
| FAM62A     | 1.45 | <a href="#">23344</a>  | ESYT1    | extended synaptotagmin-like protein 1                          |
| HNRPR      | 1.45 | <a href="#">10236</a>  | HNRNPR   | heterogeneous nuclear ribonucleoprotein R                      |
| OACT5      | 1.45 | <a href="#">10162</a>  | LPCAT3   | lysophosphatidylcholine acyltransferase 3                      |
| ABL1       | 1.44 | <a href="#">25</a>     | ABL1     | c-abl oncogene 1, receptor tyrosine kinase                     |
| KLF6       | 1.44 | <a href="#">1316</a>   | KLF6     | Kruppel-like factor 6                                          |
| PIM1       | 1.44 | <a href="#">5292</a>   | PIM1     | pim-1 oncogene                                                 |
| TRIM37     | 1.44 | <a href="#">4591</a>   | TRIM37   | tripartite motif-containing 37                                 |
| ZNF134     | 1.44 | <a href="#">7693</a>   | ZNF134   | zinc finger protein 134                                        |
| C20ORF121  | 1.44 | <a href="#">79183</a>  | TTPAL    | tocopherol (alpha) transfer protein-like                       |
| C20ORF35   | 1.44 | <a href="#">55861</a>  | DBNDD2   | dysbindin (dystrobrevin binding protein 1) domain containing 2 |
| C6ORF166   | 1.44 | <a href="#">55122</a>  | AKIRIN2  | akirin 2                                                       |
| DKFZP761I2 | 1.44 | <a href="#">83637</a>  | ZMIZ2    | zinc finger, MIZ-type containing 2                             |

|          |                      |                        |         |                                                                       |
|----------|----------------------|------------------------|---------|-----------------------------------------------------------------------|
| ANKRD33  | <a href="#">1.43</a> | <a href="#">341405</a> | ANKRD33 | ankyrin repeat domain 33                                              |
| CHSY1    | <a href="#">1.43</a> | <a href="#">22856</a>  | CHSY1   | chondroitin sulfate synthase 1                                        |
| DDX10    | <a href="#">1.43</a> | <a href="#">1662</a>   | DDX10   | DEAD (Asp-Glu-Ala-Asp) box polypeptide 10                             |
| EIF4G3   | <a href="#">1.43</a> | <a href="#">8672</a>   | EIF4G3  | eukaryotic translation initiation factor 4 gamma, 3                   |
| FKBP4    | <a href="#">1.43</a> | <a href="#">2288</a>   | FKBP4   | FK506 binding protein 4, 59kDa                                        |
| LEPROT   | <a href="#">1.43</a> | <a href="#">54741</a>  | LEPROT  | leptin receptor overlapping transcript<br>(zebrafish)                 |
| MID1IP1  | <a href="#">1.43</a> | <a href="#">58526</a>  | MID1IP1 |                                                                       |
| NDUFA6   | <a href="#">1.43</a> | <a href="#">4700</a>   | NDUFA6  | NADH dehydrogenase (ubiquinone) 1 alpha subcomplex, 6, 14kDa          |
| NECAP1   | <a href="#">1.43</a> | <a href="#">25977</a>  | NECAP1  | NECAP endocytosis associated 1                                        |
| NHP2L1   | <a href="#">1.43</a> | <a href="#">4809</a>   | NHP2L1  | NHP2 non-histone chromosome protein 2-like 1 ( <i>S. cerevisiae</i> ) |
| PPP2R5E  | <a href="#">1.43</a> | <a href="#">5529</a>   | PPP2R5E | protein phosphatase 2, regulatory subunit B', epsilon isoform         |
| SMOX     | <a href="#">1.43</a> | <a href="#">54498</a>  | SMOX    | spermine oxidase                                                      |
| TNS3     | <a href="#">1.43</a> | <a href="#">64759</a>  | TNS3    | tensin 3                                                              |
| UBQLN4   | <a href="#">1.43</a> | <a href="#">56893</a>  | UBQLN4  | ubiquilin 4                                                           |
| FLJ13149 | <a href="#">1.43</a> | <a href="#">60493</a>  | FASTKD5 | FAST kinase domains 5                                                 |
| PBEF1    | <a href="#">1.43</a> | <a href="#">10135</a>  | NAMPT   | nicotinamide phosphoribosyltransferase                                |
| DHRS3    | <a href="#">1.42</a> | <a href="#">9249</a>   | DHRS3   | dehydrogenase/reductase (SDR family) member 3                         |
| DDR1     | <a href="#">1.42</a> | <a href="#">780</a>    | DDR1    | discoidin domain receptor tyrosine kinase 1                           |
| FST      | <a href="#">1.42</a> | <a href="#">10468</a>  | FST     | follistatin                                                           |
| NELF     | <a href="#">1.42</a> | <a href="#">26012</a>  | NELF    | nasal embryonic LHRH factor                                           |
| NCBP2    | <a href="#">1.42</a> | <a href="#">22916</a>  | NCBP2   | nuclear cap binding protein subunit 2, 20kDa                          |
| PLOD1    | <a href="#">1.42</a> | <a href="#">5351</a>   | PLOD1   | procollagen-lysine 1, 2-oxoglutarate 5-dioxygenase 1                  |
| SYF2     | <a href="#">1.42</a> | <a href="#">25949</a>  | SYF2    | SYF2 homolog, RNA splicing factor ( <i>S. cerevisiae</i> )            |
| TSPAN17  | <a href="#">1.42</a> | <a href="#">26262</a>  | TSPAN17 | tetraspanin 17                                                        |
| TMEM41A  | <a href="#">1.42</a> | <a href="#">90407</a>  | TMEM41A | transmembrane protein 41A                                             |
| TRIM5    | <a href="#">1.42</a> | <a href="#">85363</a>  | TRIM5   | tripartite motif-containing 5                                         |
| WFS1     | <a href="#">1.42</a> | <a href="#">7466</a>   | WFS1    | Wolfram syndrome 1 (wolframin)                                        |
| C8ORF1   | <a href="#">1.42</a> | <a href="#">734</a>    | OSGIN2  | oxidative stress induced growth inhibitor family member 2             |
| FLJ13912 | <a href="#">1.42</a> | <a href="#">64785</a>  | GINS3   | GINS complex subunit 3 (Psf3 homolog)                                 |
| FLJ14154 | <a href="#">1.42</a> | <a href="#">79903</a>  | NAT15   | N-acetyltransferase 15 (GCN5-related, putative)                       |
| WDR39    | <a href="#">1.42</a> | <a href="#">9391</a>   | CIAO1   | cytosolic iron-sulfur protein assembly 1                              |
| CLTC     | <a href="#">1.41</a> | <a href="#">1213</a>   | CLTC    | clathrin, heavy chain (Hc)                                            |
| H2AFY2   | <a href="#">1.41</a> | <a href="#">55506</a>  | H2AFY2  | H2A histone family, member Y2                                         |
| ITGA5    | <a href="#">1.41</a> | <a href="#">3678</a>   | ITGA5   | integrin, alpha 5 (fibronectin receptor, alpha polypeptide)           |
| JAK1     | <a href="#">1.41</a> | <a href="#">3716</a>   | JAK1    | Janus kinase 1                                                        |
| MAOA     | <a href="#">1.41</a> | <a href="#">4128</a>   | MAOA    | monoamine oxidase A                                                   |
| NFIB     | <a href="#">1.41</a> | <a href="#">4781</a>   | NFIB    | nuclear factor I/B                                                    |
| PFKM     | <a href="#">1.41</a> | <a href="#">5213</a>   | PFKM    | phosphofructokinase, muscle                                           |
| PLEKHG3  | <a href="#">1.41</a> | <a href="#">26030</a>  | PLEKHG3 | domain) member 3                                                      |
| POLR2D   | <a href="#">1.41</a> | <a href="#">5433</a>   | POLR2D  | polymerase (RNA) II (DNA directed) polypeptide D                      |
| PHB2     | <a href="#">1.41</a> | <a href="#">11331</a>  | PHB2    | prohibitin 2                                                          |
| SFXN1    | <a href="#">1.41</a> | <a href="#">94081</a>  | SFXN1   | sideroflexin 1                                                        |
| TCEAL4   | <a href="#">1.41</a> | <a href="#">79921</a>  | TCEAL4  | transcription elongation factor A (SII)-like 4                        |
| ZC3H8    | <a href="#">1.41</a> | <a href="#">84524</a>  | ZC3H8   | zinc finger CCCH-type containing 8                                    |
| ZNF419   | <a href="#">1.41</a> | <a href="#">79744</a>  | ZNF419  | zinc finger protein 419                                               |
| STX3A    | <a href="#">1.41</a> | <a href="#">6809</a>   | STX3    | syntaxin 3                                                            |

|          |       |                        |          |                                                               |
|----------|-------|------------------------|----------|---------------------------------------------------------------|
| BOK      | 1.40  | <a href="#">666</a>    | BOK      | BCL2-related ovarian killer                                   |
| COL4A1   | 1.40  | <a href="#">1282</a>   | COL4A1   | collagen, type IV, alpha 1                                    |
| DNMT1    | 1.40  | <a href="#">1786</a>   | DNMT1    | DNA (cytosine-5-)-methyltransferase 1                         |
| ESRRA    | 1.40  | <a href="#">2101</a>   | ESRRA    | estrogen-related receptor alpha                               |
| TAF10    | 1.40  | <a href="#">6881</a>   | TAF10    | associated factor, 30kDa                                      |
| UCRC     | 1.40  | <a href="#">29796</a>  | UCRC     | ubiquinol-cytochrome c reductase complex (7.2 kD)             |
| USP39    | 1.40  | <a href="#">10713</a>  | USP39    | ubiquitin specific peptidase 39                               |
| RELB     | 1.40  | <a href="#">5971</a>   | RELB     | v-rel reticuloendotheliosis viral oncogene homolog B          |
| ACSL5    | -1.40 | <a href="#">51703</a>  | ACSL5    | acyl-CoA synthetase long-chain family member 5                |
| ACOT11   | -1.40 | <a href="#">26027</a>  | ACOT11   | acyl-CoA thioesterase 11                                      |
| B2M      | -1.40 | <a href="#">567</a>    | B2M      | beta-2-microglobulin                                          |
| CLDN18   | -1.40 | <a href="#">51208</a>  | CLDN18   | claudin 18                                                    |
| GCKR     | -1.40 | <a href="#">2646</a>   | GCKR     | glucokinase (hexokinase 4) regulator                          |
| LMNA     | -1.40 | <a href="#">4000</a>   | LMNA     | lamin A/C                                                     |
| MRPS31   | -1.40 | <a href="#">10240</a>  | MRPS31   | mitochondrial ribosomal protein S31                           |
| PLAGL2   | -1.40 | <a href="#">5326</a>   | PLAGL2   | pleiomorphic adenoma gene-like 2                              |
| RRAS2    | -1.40 | <a href="#">22800</a>  | RRAS2    | related RAS viral (r-ras) oncogene homolog 2                  |
| RPS9     | -1.40 | <a href="#">6203</a>   | RPS9     | ribosomal protein S9                                          |
| ST14     | -1.40 | <a href="#">6768</a>   | ST14     | suppression of tumorigenicity 14 (colon carcinoma)            |
| C12ORF10 | -1.40 | <a href="#">60314</a>  | C12ORF10 | chromosome 12 open reading frame 10                           |
| FAM82C   | -1.40 | <a href="#">55177</a>  | FAM82C   | family with sequence similarity 82, member C                  |
| CARD11   | -1.41 | <a href="#">84433</a>  | CARD11   | caspase recruitment domain family, member 11                  |
| C4BPB    | -1.41 | <a href="#">725</a>    | C4BPB    | complement component 4 binding protein, beta                  |
| DDT      | -1.41 | <a href="#">1652</a>   | DDT      | D-dopachrome tautomerase                                      |
| H2BFS    | -1.41 | <a href="#">54145</a>  | H2BFS    | H2B histone family, member S                                  |
| IRF1     | -1.41 | <a href="#">3659</a>   | IRF1     | interferon regulatory factor 1                                |
| PPIB     | -1.41 | <a href="#">5479</a>   | PPIB     | peptidylprolyl isomerase B (cyclophilin B)                    |
| RPL18    | -1.41 | <a href="#">6141</a>   | RPL18    | ribosomal protein L18                                         |
| SLC9A3R1 | -1.41 | <a href="#">9368</a>   | SLC9A3R1 | regulator 1                                                   |
| TOMM7    | -1.41 | <a href="#">54543</a>  | TOMM7    | translocase of outer mitochondrial membrane 7 homolog (yeast) |
| C10ORF65 | -1.41 | <a href="#">112817</a> | HOGA1    | 4-hydroxy-2-oxoglutarate aldolase 1                           |
| C1ORF116 | -1.41 | <a href="#">79098</a>  | C1orf116 | chromosome 1 open reading frame 116                           |
| C20ORF54 | -1.41 | <a href="#">113278</a> | C20orf54 | chromosome 20 open reading frame 54                           |
| C9ORF16  | -1.41 | <a href="#">112817</a> | DHDPSL   | dihydrodipicolinate synthase-like, mitochondrial              |
| FLJ11017 | -1.41 | <a href="#">55286</a>  | C4orf19  | chromosome 4 open reading frame 19                            |
| SLITL2   | -1.41 | <a href="#">114990</a> | VASN     | vasorin                                                       |
| DECR1    | -1.42 | <a href="#">1666</a>   | DECR1    | 2,4-dienoyl CoA reductase 1, mitochondrial                    |
| DYNLT1   | -1.42 | <a href="#">6993</a>   | DYNLT1   | dynein, light chain, Tctex-type 1                             |
| KRT13    | -1.42 | <a href="#">3860</a>   | KRT13    | keratin 13                                                    |
| NDUFS4   | -1.42 | <a href="#">4724</a>   | NDUFS4   | coenzyme Q reductase)                                         |
| NDUFV1   | -1.42 | <a href="#">4723</a>   | NDUFV1   | NADH dehydrogenase (ubiquinone) flavoprotein 1, 51kDa         |
| RHOA     | -1.42 | <a href="#">387</a>    | RHOA     | ras homolog gene family, member A                             |
| SAV1     | -1.42 | <a href="#">60485</a>  | SAV1     | salvador homolog 1 (Drosophila)                               |
| COQ5     | -1.43 | <a href="#">84274</a>  | COQ5     | coenzyme Q5 homolog, methyltransferase (S. cerevisiae)        |
| GTF2E2   | -1.43 | <a href="#">2961</a>   | GTF2E2   | general transcription factor IIE, polypeptide 2, beta 34kDa   |
| QARS     | -1.43 | <a href="#">5859</a>   | QARS     | glutamyl-tRNA synthetase                                      |

|           |       |                        |          |                                                                        |
|-----------|-------|------------------------|----------|------------------------------------------------------------------------|
| MELK      | -1.43 | <a href="#">9833</a>   | MELK     | maternal embryonic leucine zipper kinase                               |
| MRPS22    | -1.43 | <a href="#">56945</a>  | MRPS22   | mitochondrial ribosomal protein S22                                    |
| POLR2I    | -1.43 | <a href="#">5438</a>   | POLR2I   | polymerase (RNA) II (DNA directed) polypeptide I, 14.5kDa              |
| PPA2      | -1.43 | <a href="#">27068</a>  | PPA2     | pyrophosphatase (inorganic) 2                                          |
| XPC       | -1.43 | <a href="#">7508</a>   | XPC      | xeroderma pigmentosum, complementation group C                         |
| C14ORF112 | -1.43 | <a href="#">51241</a>  | COX16    | COX16 cytochrome c oxidase assembly homolog ( <i>S. cerevisiae</i> )   |
| PHACS     | -1.43 | <a href="#">84680</a>  | ACCS     | 1-aminocyclopropane-1-carboxylate synthase homolog                     |
| RPA3      | -1.44 | <a href="#">6119</a>   | RPA3     | replication protein A3, 14kDa                                          |
| SLC25A23  | -1.44 | <a href="#">79085</a>  | SLC25A23 | member 23                                                              |
| AMY1C     | -1.45 | <a href="#">278</a>    | AMY1C    | amylase, alpha 1C (salivary)                                           |
| BCAT2     | -1.45 | <a href="#">587</a>    | BCAT2    | branched chain aminotransferase 2, mitochondrial                       |
| CALB2     | -1.45 | <a href="#">794</a>    | CALB2    | calbindin 2                                                            |
| CASP3     | -1.45 | <a href="#">836</a>    | CASP3    | caspase 3, apoptosis-related cysteine peptidase                        |
| CDR2L     | -1.45 | <a href="#">30850</a>  | CDR2L    | cerebellar degeneration-related protein 2-like                         |
| MYEOV     | -1.45 | <a href="#">26579</a>  | MYEOV    | myelomas)                                                              |
| NMU       | -1.45 | <a href="#">10874</a>  | NMU      | neuromedin U                                                           |
| ARHGAP27  | -1.45 | <a href="#">201176</a> | ARHGAP27 | Rho GTPase activating protein 27                                       |
| SF3B5     | -1.45 | <a href="#">83443</a>  | SF3B5    | splicing factor 3b, subunit 5, 10kDa                                   |
| TXNIP     | -1.45 | <a href="#">10628</a>  | TXNIP    | thioredoxin interacting protein                                        |
| XRCC1     | -1.45 | <a href="#">7515</a>   | XRCC1    | X-ray repair complementing defective repair in Chinese hamster cells 1 |
| ZCCHC9    | -1.45 | <a href="#">84240</a>  | ZCCHC9   | zinc finger, CCHC domain containing 9                                  |
| AHNAK     | -1.46 | <a href="#">79026</a>  | AHNAK    | AHNAK nucleoprotein                                                    |
| ANAPC11   | -1.46 | <a href="#">51529</a>  | ANAPC11  | anaphase promoting complex subunit 11                                  |
| COX7B2    | -1.46 | <a href="#">170712</a> | COX7B2   | cytochrome c oxidase subunit VIIb2                                     |
| KRT15     | -1.46 | <a href="#">3866</a>   | KRT15    | keratin 15                                                             |
| NACA      | -1.46 | <a href="#">4666</a>   | NACA     | nascent polypeptide-associated complex alpha subunit                   |
| PKP2      | -1.46 | <a href="#">5318</a>   | PKP2     | plakophilin 2                                                          |
| DNTTIP1   | -1.47 | <a href="#">116092</a> | DNTTIP1  | deoxynucleotidyltransferase, terminal, interacting protein 1           |
| SOD1      | -1.47 | <a href="#">6647</a>   | SOD1     | superoxide dismutase 1, soluble                                        |
| C10ORF42  | -1.47 | <a href="#">90550</a>  | CCDC109A | coiled-coil domain containing 109A                                     |
| MTHFS     | -1.48 | <a href="#">10588</a>  | MTHFS    | cyclo-ligase)                                                          |
| CHP       | -1.48 | <a href="#">11261</a>  | CHP      | calcium binding protein P22                                            |
| CST1      | -1.48 | <a href="#">1469</a>   | CST1     | cystatin SN                                                            |
| MRPL50    | -1.48 | <a href="#">54534</a>  | MRPL50   | mitochondrial ribosomal protein L50                                    |
| OSBPL7    | -1.48 | <a href="#">114881</a> | OSBPL7   | oxysterol binding protein-like 7                                       |
| PMPCB     | -1.48 | <a href="#">9512</a>   | PMPCB    | peptidase (mitochondrial processing) beta                              |
| PHYH      | -1.48 | <a href="#">5264</a>   | PHYH     | phytanoyl-CoA 2-hydroxylase                                            |
| S100A14   | -1.48 | <a href="#">57402</a>  | S100A14  | S100 calcium binding protein A14                                       |
| SLPI      | -1.48 | <a href="#">6590</a>   | SLPI     | secretory leukocyte peptidase inhibitor                                |
| TLCD1     | -1.48 | <a href="#">116238</a> | TLCD1    | TLC domain containing 1                                                |
| C22ORF13  | -1.48 | <a href="#">83606</a>  | C22orf13 | chromosome 22 open reading frame 13                                    |
| LOC389541 | -1.48 | <a href="#">389541</a> | C7orf59  | chromosome 7 open reading frame 59                                     |
| MGC33212  | -1.48 | <a href="#">255758</a> | TCTEX1D2 | Tctex1 domain containing 2                                             |
| AK1       | -1.49 | <a href="#">203</a>    | AK1      | adenylate kinase 1                                                     |
| CBR4      | -1.49 | <a href="#">84869</a>  | CBR4     | carbonyl reductase 4                                                   |
| DDAH1     | -1.49 | <a href="#">23576</a>  | DDAH1    | dimethylarginine dimethylaminohydrolase 1                              |



|           |       |                        |           |                                                                                |
|-----------|-------|------------------------|-----------|--------------------------------------------------------------------------------|
| NP        | -1.49 | <a href="#">4860</a>   | NP        | nucleoside phosphorylase                                                       |
| STIL      | -1.49 | <a href="#">6491</a>   | STIL      | SCL/TAL1 interrupting locus                                                    |
| SF3B14    | -1.49 | <a href="#">51639</a>  | SF3B14    | splicing factor 3B, 14 kDa subunit                                             |
| ATP5H     | -1.50 | <a href="#">10476</a>  | ATP5H     | ATP synthase, H <sup>+</sup> transporting, mitochondrial F0 complex, subunit d |
| CSNK1D    | -1.50 | <a href="#">1453</a>   | CSNK1D    | casein kinase 1, delta                                                         |
| CORO2A    | -1.50 | <a href="#">7464</a>   | CORO2A    | coronin, actin binding protein, 2A                                             |
| DUSP3     | -1.50 | <a href="#">1845</a>   | DUSP3     | related)                                                                       |
| GLE1L     | -1.50 | <a href="#">2733</a>   | GLE1L     | GLE1 RNA export mediator-like (yeast)                                          |
| KRT19     | -1.50 | <a href="#">3880</a>   | KRT19     | keratin 19                                                                     |
| MRPL22    | -1.50 | <a href="#">29093</a>  | MRPL22    | mitochondrial ribosomal protein L22                                            |
| MRPL40    | -1.50 | <a href="#">64976</a>  | MRPL40    | mitochondrial ribosomal protein L40                                            |
| PPL       | -1.50 | <a href="#">5493</a>   | PPL       | periplakin                                                                     |
| ST3GAL4   | -1.50 | <a href="#">6484</a>   | ST3GAL4   | ST3 beta-galactoside alpha-2,3-sialyltransferase 4                             |
| SNCG      | -1.50 | <a href="#">6623</a>   | SNCG      | synuclein, gamma (breast cancer-specific protein 1)                            |
| CITED2    | -1.51 | <a href="#">10370</a>  | CITED2    | terminal domain, 2                                                             |
| C9ORF89   | -1.51 | <a href="#">84270</a>  | C9orf89   | chromosome 9 open reading frame 89                                             |
| CNTN1     | -1.51 | <a href="#">1272</a>   | CNTN1     | contactin 1                                                                    |
| IREB2     | -1.51 | <a href="#">3658</a>   | IREB2     | iron-responsive element binding protein 2                                      |
| MAPRE2    | -1.51 | <a href="#">10982</a>  | MAPRE2    | microtubule-associated protein, RP/EB family, member 2                         |
| MTMR11    | -1.51 | <a href="#">10903</a>  | MTMR11    | myotubularin related protein 11                                                |
| RPS6      | -1.51 | <a href="#">6194</a>   | RPS6      | ribosomal protein S6                                                           |
| S100P     | -1.51 | <a href="#">6286</a>   | S100P     | S100 calcium binding protein P                                                 |
| SH3BGRL2  | -1.51 | <a href="#">83699</a>  | SH3BGRL2  | SH3 domain binding glutamic acid-rich protein like 2                           |
| SLC22A18  | -1.51 | <a href="#">5002</a>   | SLC22A18  | solute carrier family 22 (organic cation transporter), member 18               |
| TSPAN3    | -1.51 | <a href="#">10099</a>  | TSPAN3    | tetraspanin 3                                                                  |
| CDC20     | -1.52 | <a href="#">991</a>    | CDC20     | CDC20 cell division cycle 20 homolog ( <i>S. cerevisiae</i> )                  |
| CCDC23    | -1.52 | <a href="#">374969</a> | CCDC23    | coiled-coil domain containing 23                                               |
| MGC61571  | -1.52 | <a href="#">152100</a> | CMC1      | COX assembly mitochondrial protein homolog ( <i>S. cerevisiae</i> )            |
| GTF2H5    | -1.52 | <a href="#">404672</a> | GTF2H5    | general transcription factor IIH, polypeptide 5                                |
| KIAA0528  | -1.52 | <a href="#">9847</a>   | KIAA0528  | KIAA0528                                                                       |
| SDHD      | -1.52 | <a href="#">6392</a>   | SDHD      | protein                                                                        |
| C10ORF116 | -1.53 | <a href="#">10974</a>  | C10orf116 | chromosome 10 open reading frame 116                                           |
| F2RL1     | -1.53 | <a href="#">2150</a>   | F2RL1     | coagulation factor II (thrombin) receptor-like 1                               |
| NANS      | -1.53 | <a href="#">54187</a>  | NANS      | N-acetylneuraminic acid synthase (sialic acid synthase)                        |
| RND3      | -1.53 | <a href="#">390</a>    | RND3      | Rho family GTPase 3                                                            |
| RPS13     | -1.53 | <a href="#">6207</a>   | RPS13     | ribosomal protein S13                                                          |
| COMMD1    | -1.54 | <a href="#">150684</a> | COMMD1    | copper metabolism (Murr1) domain containing 1                                  |
| DCAKD     | -1.54 | <a href="#">79877</a>  | DCAKD     | dephospho-CoA kinase domain containing                                         |
| LSM3      | -1.54 | <a href="#">27258</a>  | LSM3      | LSM3 homolog, U6 small nuclear RNA associated ( <i>S. cerevisiae</i> )         |
| MRPL39    | -1.54 | <a href="#">54148</a>  | MRPL39    | mitochondrial ribosomal protein L39                                            |
| NDUFB7    | -1.54 | <a href="#">4713</a>   | NDUFB7    | NADH dehydrogenase (ubiquinone) 1 beta subcomplex, 7, 18kDa                    |
| RPL39L    | -1.54 | <a href="#">116832</a> | RPL39L    | ribosomal protein L39-like                                                     |
| ALDH3A2   | -1.55 | <a href="#">224</a>    | ALDH3A2   | aldehyde dehydrogenase 3 family, member A2                                     |
| GANAB     | -1.55 | <a href="#">23193</a>  | GANAB     | glucosidase, alpha; neutral AB                                                 |
| MYO18A    | -1.55 | <a href="#">399687</a> | MYO18A    | myosin XVIIIa                                                                  |
| PDZK1IP1  | -1.55 | <a href="#">10158</a>  | PDZK1IP1  | PDZK1 interacting protein 1                                                    |

|           |       |                        |          |                                                                           |
|-----------|-------|------------------------|----------|---------------------------------------------------------------------------|
| PET112L   | -1.55 | <a href="#">5188</a>   | PET112L  | PET112-like (yeast)                                                       |
| PCK2      | -1.55 | <a href="#">5106</a>   | PCK2     | phosphoenolpyruvate carboxykinase 2 (mitochondrial)                       |
| PLSCR1    | -1.55 | <a href="#">5359</a>   | PLSCR1   | phospholipid scramblase 1                                                 |
| POLR3C    | -1.55 | <a href="#">10623</a>  | POLR3C   | polymerase (RNA) III (DNA directed) polypeptide C (62kD)                  |
| RPS5      | -1.55 | <a href="#">6193</a>   | RPS5     | ribosomal protein S5                                                      |
| BBS4      | -1.56 | <a href="#">585</a>    | BBS4     | Bardet-Biedl syndrome 4                                                   |
| C21ORF25  | -1.56 | <a href="#">25966</a>  | C2CD2    | C2 calcium-dependent domain containing 2                                  |
| CHMP2A    | -1.56 | <a href="#">27243</a>  | CHMP2A   | chromatin modifying protein 2A                                            |
| CSTB      | -1.56 | <a href="#">1476</a>   | CSTB     | cystatin B (stefin B)                                                     |
| C1ORF60   | -1.56 | <a href="#">65123</a>  | INTS3    | integrator complex subunit 3                                              |
| IL10RB    | -1.56 | <a href="#">3588</a>   | IL10RB   | interleukin 10 receptor, beta                                             |
| MGST3     | -1.56 | <a href="#">4259</a>   | MGST3    | microsomal glutathione S-transferase 3                                    |
| MRPS9     | -1.56 | <a href="#">64965</a>  | MRPS9    | mitochondrial ribosomal protein S9                                        |
| RPL4      | -1.56 | <a href="#">6124</a>   | RPL4     | ribosomal protein L4                                                      |
| CTSB      | -1.57 | <a href="#">1508</a>   | CTSB     | cathepsin B                                                               |
| FAM73A    | -1.57 | <a href="#">374986</a> | FAM73A   | family with sequence similarity 73, member A                              |
| PTGES     | -1.57 | <a href="#">9536</a>   | PTGES    | prostaglandin E synthase                                                  |
| SPRR1A    | -1.57 | <a href="#">6698</a>   | SPRR1A   | small proline-rich protein 1A                                             |
| ZMYM6     | -1.57 | <a href="#">9204</a>   | ZMYM6    | zinc finger, MYM-type 6                                                   |
| APBB3     | -1.58 | <a href="#">10307</a>  | APBB3    | amyloid beta (A4) precursor protein-binding, family B, member 3           |
| POLR3GL   | -1.58 | <a href="#">84265</a>  | POLR3GL  | polymerase (RNA) III (DNA directed) polypeptide G (32kD) like             |
| RAB26     | -1.58 | <a href="#">25837</a>  | RAB26    | RAB26, member RAS oncogene family                                         |
| THYN1     | -1.58 | <a href="#">29087</a>  | THYN1    | thymocyte nuclear protein 1                                               |
| CDC23     | -1.59 | <a href="#">8697</a>   | CDC23    | CDC23 (cell division cycle 23, yeast, homolog)                            |
| GMDS      | -1.59 | <a href="#">2762</a>   | GMDS     | GDP-mannose 4,6-dehydratase                                               |
| MKRN2     | -1.59 | <a href="#">23609</a>  | MKRN2    | makorin, ring finger protein, 2                                           |
| PI3       | -1.59 | <a href="#">5266</a>   | PI3      | peptidase inhibitor 3, skin-derived (SKALP)                               |
| FKSG30    | -1.59 | <a href="#">440915</a> | POTEKP   | POTE ankyrin domain family, member K, pseudogene                          |
| LOC201175 | -1.59 | <a href="#">201175</a> | SH3D20   | SH3 domain containing 20                                                  |
| C1ORF41   | -1.60 | <a href="#">51668</a>  | HSPB11   | heat shock protein family B (small), member 11                            |
| MRCL3     | -1.60 | <a href="#">10627</a>  | MYL12A   | myosin, light chain 12A, regulatory, non-sarcomeric                       |
| NMI       | -1.60 | <a href="#">9111</a>   | NMI      | N-myc (and STAT) interactor                                               |
| TSPAN1    | -1.60 | <a href="#">10103</a>  | TSPAN1   | tetraspanin 1                                                             |
| CYB561    | -1.61 | <a href="#">1534</a>   | CYB561   | cytochrome b-561                                                          |
| ELF3      | -1.61 | <a href="#">1999</a>   | ELF3     | E74-like factor 3 (ets domain transcription factor, epithelial-specific ) |
| TBC1D22A  | -1.61 | <a href="#">25771</a>  | TBC1D22A | TBC1 domain family, member 22A                                            |
| WDR68     | -1.61 | <a href="#">10238</a>  | WDR68    | WD repeat domain 68                                                       |
| C19ORF33  | -1.62 | <a href="#">64073</a>  | C19orf33 | chromosome 19 open reading frame 33                                       |
| EPS8L1    | -1.62 | <a href="#">54869</a>  | EPS8L1   | EPS8-like 1                                                               |
| MDH1      | -1.62 | <a href="#">4190</a>   | MDH1     | malate dehydrogenase 1, NAD (soluble)                                     |
| NOLA2     | -1.62 | <a href="#">55651</a>  | NOLA2    | nucleolar protein family A, member 2 (H/ACA small nucleolar RNPs)         |
| PCNP      | -1.62 | <a href="#">57092</a>  | PCNP     | PEST proteolytic signal containing nuclear protein                        |
| PPP3CB    | -1.62 | <a href="#">5532</a>   | PPP3CB   | (calcineurin A beta)                                                      |
| PTD015    | -1.63 | <a href="#">28971</a>  | C11orf67 | chromosome 11 open reading frame 67                                       |
| NUDT8     | -1.63 | <a href="#">254552</a> | NUDT8    | nudix (nucleoside diphosphate linked moiety X)-type motif 8               |
| OSTF1     | -1.63 | <a href="#">26578</a>  | OSTF1    | osteoclast stimulating factor 1                                           |

|          |       |                        |          |                                                                       |
|----------|-------|------------------------|----------|-----------------------------------------------------------------------|
| S100A10  | -1.63 | <a href="#">6281</a>   | S100A10  | S100 calcium binding protein A10                                      |
| TP53INP2 | -1.63 | <a href="#">58476</a>  | TP53INP2 | tumor protein p53 inducible nuclear protein 2                         |
| GALE     | -1.63 | <a href="#">2582</a>   | GALE     | UDP-galactose-4-epimerase                                             |
| M160     | -1.64 | <a href="#">283316</a> | CD163L1  | CD163 molecule-like 1                                                 |
| C12ORF62 | -1.64 | <a href="#">84987</a>  | C12orf62 | chromosome 12 open reading frame 62                                   |
| GTF2IRD2 | -1.64 | <a href="#">84163</a>  | GTF2IRD2 | GTF2I repeat domain containing 2                                      |
| SCNN1A   | -1.64 | <a href="#">6337</a>   | SCNN1A   | sodium channel, nonvoltage-gated 1 alpha                              |
| HOXB5    | -1.65 | <a href="#">3215</a>   | HOXB5    | homeobox B5                                                           |
| OBFC1    | -1.65 | <a href="#">79991</a>  | OBFC1    | oligonucleotide/oligosaccharide-binding fold containing 1             |
| PRSS3    | -1.65 | <a href="#">5646</a>   | PRSS3    | protease, serine, 3 (mesotrypsin)                                     |
| DHRS1    | -1.66 | <a href="#">115817</a> | DHRS1    | dehydrogenase/reductase (SDR family) member 1                         |
| IGFBP6   | -1.66 | <a href="#">3489</a>   | IGFBP6   | insulin-like growth factor binding protein 6                          |
| NDUFB6   | -1.66 | <a href="#">4712</a>   | NDUFB6   | NADH dehydrogenase (ubiquinone) 1 beta subcomplex, 6, 17kDa           |
| TUFT1    | -1.66 | <a href="#">7286</a>   | TUFT1    | tuftelin 1                                                            |
| LPP      | -1.67 | <a href="#">4026</a>   | LPP      | LIM domain containing preferred translocation partner in lipoma       |
| HIBCH    | -1.68 | <a href="#">26275</a>  | HIBCH    | 3-hydroxyisobutyryl-Coenzyme A hydrolase                              |
| FUT3     | -1.68 | <a href="#">2525</a>   | FUT3     | blood group)                                                          |
| GLDC     | -1.68 | <a href="#">2731</a>   | GLDC     | glycine dehydrogenase (decarboxylating)                               |
| SLC37A4  | -1.68 | <a href="#">2542</a>   | SLC37A4  | solute carrier family 37 (glycerol-6-phosphate transporter), member 4 |
| AVPI1    | -1.69 | <a href="#">60370</a>  | AVPI1    | arginine vasopressin-induced 1                                        |
| FDFT1    | -1.69 | <a href="#">2222</a>   | FDFT1    | farnesyl-diphosphate farnesyltransferase 1                            |
| RALB     | -1.69 | <a href="#">5899</a>   | RALB     | binding protein)                                                      |
| AUH      | -1.70 | <a href="#">549</a>    | AUH      | AU RNA binding protein/enoyl-Coenzyme A hydratase                     |
| MTX2     | -1.71 | <a href="#">10651</a>  | MTX2     | metaxin 2                                                             |
| PDCD6IP  | -1.71 | <a href="#">10015</a>  | PDCD6IP  | programmed cell death 6 interacting protein                           |
| FLJ10986 | -1.72 | <a href="#">55277</a>  | FGGY     | FGGY carbohydrate kinase domain containing                            |
| GLYCTK   | -1.73 | <a href="#">132158</a> | GLYCTK   | glycerate kinase                                                      |
| MAPK3    | -1.73 | <a href="#">5595</a>   | MAPK3    | mitogen-activated protein kinase 3                                    |
| ASS      | -1.76 | <a href="#">445</a>    | ASS1     | argininosuccinate synthase 1                                          |
| ALG5     | -1.76 | <a href="#">29880</a>  | ALG5     | phosphate beta-glucosyltransferase)                                   |
| CIB1     | -1.76 | <a href="#">10519</a>  | CIB1     | calcium and integrin binding 1 (calmyrin)                             |
| LGALS3   | -1.76 | <a href="#">3958</a>   | LGALS3   | lectin, galactoside-binding, soluble, 3 (galectin 3)                  |
| MRPS15   | -1.76 | <a href="#">64960</a>  | MRPS15   | mitochondrial ribosomal protein S15                                   |
| FLJ22662 | -1.76 | <a href="#">79887</a>  | PLBD1    | phospholipase B domain containing 1                                   |
| GALM     | -1.77 | <a href="#">130589</a> | GALM     | galactose mutarotase (aldose 1-epimerase)                             |
| TJP3     | -1.77 | <a href="#">27134</a>  | TJP3     | tight junction protein 3 (zona occludens 3)                           |
| ZNF503   | -1.77 | <a href="#">84858</a>  | ZNF503   | zinc finger protein 503                                               |
| ACTB     | -1.79 | <a href="#">60</a>     | ACTB     | actin, beta                                                           |
| CDC42EP5 | -1.79 | <a href="#">148170</a> | CDC42EP5 | CDC42 effector protein (Rho GTPase binding) 5                         |
| KRT18    | -1.79 | <a href="#">3875</a>   | KRT18    | keratin 18                                                            |
| SCD      | -1.79 | <a href="#">6319</a>   | SCD      | stearoyl-CoA desaturase (delta-9-desaturase)                          |
| C9ORF46  | -1.80 | <a href="#">55848</a>  | C9orf46  | chromosome 9 open reading frame 46                                    |
| ACTG1    | -1.81 | <a href="#">71</a>     | ACTG1    | actin, gamma 1                                                        |
| IVNS1ABP | -1.81 | <a href="#">10625</a>  | IVNS1ABP | influenza virus NS1A binding protein                                  |
| KCNS1    | -1.81 | <a href="#">3787</a>   | KCNS1    | member 1                                                              |
| CAPN5    | -1.82 | <a href="#">726</a>    | CAPN5    | calpain 5                                                             |

|           |       |                        |            |                                                                        |
|-----------|-------|------------------------|------------|------------------------------------------------------------------------|
| C15ORF48  | -1.82 | <a href="#">84419</a>  | C15orf48   | chromosome 15 open reading frame 48                                    |
| MGC20255  | -1.82 | <a href="#">90324</a>  | CCDC97     | coiled-coil domain containing 97                                       |
| EIF4A2    | -1.83 | <a href="#">1974</a>   | EIF4A2     | eukaryotic translation initiation factor 4A, isoform 2                 |
| CYP4F12   | -1.84 | <a href="#">66002</a>  | CYP4F12    | cytochrome P450, family 4, subfamily F, polypeptide 12                 |
| STAMPB    | -1.84 | <a href="#">10617</a>  | STAMPB     | STAM binding protein                                                   |
| TNFRSF14  | -1.84 | <a href="#">8764</a>   | TNFRSF14   | entry mediator)                                                        |
| ALDOA     | -1.86 | <a href="#">226</a>    | ALDOA      | aldolase A, fructose-bisphosphate                                      |
| GPR92     | -1.86 | <a href="#">57121</a>  | GPR92      | G protein-coupled receptor 92                                          |
| SCEL      | -1.86 | <a href="#">8796</a>   | SCEL       | sciellin                                                               |
| SEMA3B    | -1.86 | <a href="#">7869</a>   | SEMA3B     | secreted, (semaphorin) 3B                                              |
| TSC22D3   | -1.86 | <a href="#">1831</a>   | TSC22D3    | TSC22 domain family, member 3                                          |
| ANXA3     | -1.88 | <a href="#">306</a>    | ANXA3      | annexin A3                                                             |
| FGF19     | -1.88 | <a href="#">9965</a>   | FGF19      | fibroblast growth factor 19                                            |
| MVP       | -1.88 | <a href="#">9961</a>   | MVP        | major vault protein                                                    |
| CFB       | -1.91 | <a href="#">629</a>    | CFB        | complement factor B                                                    |
| ATAD4     | -1.92 | <a href="#">79170</a>  | ATAD4      | ATPase family, AAA domain containing 4                                 |
| SLC16A5   | -1.92 | <a href="#">9121</a>   | SLC16A5    | solute carrier family 16, member 5 (monocarboxylic acid transporter 6) |
| TMEM16A   | -1.92 | <a href="#">55107</a>  | TMEM16A    | transmembrane protein 16A                                              |
| FXYD3     | -1.94 | <a href="#">5349</a>   | FXYD3      | FXYD domain containing ion transport regulator 3                       |
| TNFSF5IP1 | -1.95 | <a href="#">56984</a>  | TNFSF5IP1  | tumor necrosis factor superfamily, member 5-induced protein 1          |
| UNC93B1   | -1.97 | <a href="#">81622</a>  | UNC93B1    | unc-93 homolog B1 (C. elegans)                                         |
| MMP28     | -1.99 | <a href="#">79148</a>  | MMP28      | matrix metalloproteinase 28                                            |
| TPK1      | -2.02 | <a href="#">27010</a>  | TPK1       | thiamin pyrophosphokinase 1                                            |
| LGR4      | -2.06 | <a href="#">55366</a>  | LGR4       | leucine-rich repeat-containing G protein-coupled receptor 4            |
| F3        | -2.08 | <a href="#">2152</a>   | F3         | coagulation factor III (thromboplastin, tissue factor)                 |
| MUC20     | -2.10 | <a href="#">200958</a> | MUC20      | mucin 20, cell surface associated                                      |
| FLJ20625  | -2.11 | <a href="#">55004</a>  | C11orf59   | chromosome 11 open reading frame 59                                    |
| CKB       | -2.11 | <a href="#">1152</a>   | CKB        | creatine kinase, brain                                                 |
| GLS       | -2.13 | <a href="#">2744</a>   | GLS        | glutaminase                                                            |
| PQLC3     | -2.15 | <a href="#">130814</a> | PQLC3      | PQ loop repeat containing 3                                            |
| ALDH3A1   | -2.16 | <a href="#">218</a>    | ALDH3A1    | aldehyde dehydrogenase 3 family, memberA1                              |
| TRIM31    | -2.16 | <a href="#">11074</a>  | TRIM31     | tripartite motif-containing 31                                         |
| RNASET2   | -2.25 | <a href="#">8635</a>   | RNASET2    | ribonuclease T2                                                        |
| SDCBP2    | -2.25 | <a href="#">27111</a>  | SDCBP2     | syndecan binding protein (syntenin) 2                                  |
| CD68      | -2.26 | <a href="#">968</a>    | CD68       | CD68 molecule                                                          |
| KRT8      | -2.26 | <a href="#">3856</a>   | KRT8       | keratin 8                                                              |
| SERPINB1  | -2.35 | <a href="#">1992</a>   | SERPINB1   | serpin peptidase inhibitor, clade B (ovalbumin), member 1              |
| C         | -2.38 | <a href="#">8338</a>   | HIST2H2AC  | histone cluster 2, H2ac                                                |
| A         | -2.41 | <a href="#">8337</a>   | HIST2H2AA3 | histone cluster 2, H2aa3                                               |
| ARHGDIB   | -2.46 | <a href="#">397</a>    | ARHGDIB    | Rho GDP dissociation inhibitor (GDI) beta                              |
| DPM3      | -2.54 | <a href="#">54344</a>  | DPM3       | dolichyl-phosphate mannosyltransferase polypeptide 3                   |
| CEACAM1   | -2.56 | <a href="#">634</a>    | CEACAM1    | glycoprotein)                                                          |
| CEACAM6   | -2.56 | <a href="#">4680</a>   | CEACAM6    | specific cross reacting antigen)                                       |
| SCGB1A1   | -2.69 | <a href="#">7356</a>   | SCGB1A1    | secretoglobin, family 1A, member 1 (uteroglobin)                       |
| MUC13     | -2.71 | <a href="#">56667</a>  | MUC13      | mucin 13, cell surface associated                                      |
| CTGF      | -2.77 | <a href="#">1490</a>   | CTGF       | connective tissue growth factor                                        |

|         |       |                       |         |                                                                 |
|---------|-------|-----------------------|---------|-----------------------------------------------------------------|
| MUC1    | -3.19 | <a href="#">4582</a>  | MUC1    | mucin 1, cell surface associated                                |
| PSG9    | -3.30 | <a href="#">5678</a>  | PSG9    | pregnancy specific beta-1-glycoprotein 9                        |
| TINP1   | -3.45 | <a href="#">10412</a> | NSA2    | NSA2 ribosome biogenesis homolog ( <i>S. cerevisiae</i> )       |
| PSG11   | -3.46 | <a href="#">5680</a>  | PSG11   | pregnancy specific beta-1-glycoprotein 11                       |
| CEACAM5 | -3.97 | <a href="#">1048</a>  | CEACAM5 | carcinoembryonic antigen-related cell adhesion molecule 5       |
| AGT     | -4.58 | <a href="#">183</a>   | AGT     | angiotensinogen (serpin peptidase inhibitor, clade A, member 8) |
| SPRR3   | -4.66 | <a href="#">6707</a>  | SPRR3   | small proline-rich protein 3                                    |
| CLDN7   | -6.88 | <a href="#">1366</a>  | CLDN7   | claudin 7                                                       |
