# Supplementary material for: Claudin-7 Is Frequently Overexpressed in Ovarian Cancer and Promotes Invasion
Source: PubMed Central journal article supplement (PMC3137611; doi:10.1371/journal.pone.0022119), 2011-07-15
Supplement: pone.0022119.s003.pdf [file pone.0022119.s003.pdf]

**Supp. Table 3(A-C) "Global functional analysis" conducted using Ingenuity Pathway Analysis**

**Supp. Table 3A: Top Networks**

| OVCAR2                                                                                                                 |       |
|------------------------------------------------------------------------------------------------------------------------|-------|
| Associated network functions                                                                                           | Score |
| Amino Acid Metabolism, Post-Translational Modification, Small Molecule Biochemistry                                    | 51    |
| Hematological System Development and Function, Immune and Lymphatic System development and Function, Tissue Morphology | 41    |
| Cellular Development, Cancer, gene Expression                                                                          | 37    |
| Cell Signaling, Cell death, Cellular Growth and Proliferation                                                          | 34    |
| Lipid metabolism, Small Molecule Biochemistry, Molecular Transport                                                     | 34    |

| OVCA420                                                                                              |       |
|------------------------------------------------------------------------------------------------------|-------|
| Associated network functions                                                                         | Score |
| Organismal Injury and abnormalitis, cellular movement, Hematological System development and Function | 49    |
| Molecular transport, RNA trafficking, Cancer                                                         | 46    |
| Cancer, Cell death, cell cycle                                                                       | 37    |
| Cancer, Cell Cycle, Gene Expression                                                                  | 33    |
| Lipid metabolism, Molecular transport, Small Molecule Biochemistry                                   | 30    |

**Supp Table 3B: Top Canonical Pathways**

| <b>OVCA2</b>                      |                |                |
|-----------------------------------|----------------|----------------|
| <b>Name</b>                       | <b>p-value</b> | <b>Ratio</b>   |
| IGF-1 Signaling                   | 3.20E-04       | 12/92 (0.13)   |
| Glucocorticoid receptor Signaling | 4.64E-04       | 24/275 (0.087) |
| Ceramide Signaling                | 1.13E-03       | 10/79 (0.127)  |
| N-Glycan Biosynthesis             | 1.21E-03       | 8/87 (0.092)   |
| Integrin Signaling                | 1.76E-03       | 18/192 (0.094) |

| <b>OVCA420</b>                          |                |                |
|-----------------------------------------|----------------|----------------|
| <b>Name</b>                             | <b>p-value</b> | <b>Ratio</b>   |
| Integrin Signaling                      | 6.29E-07       | 20/192 (0.104) |
| NRF2-mediated Oxidative Stress Response | 4.30E-04       | 14/180 (0.078) |
| T Cell Receptor Signaling               | 1.37E-03       | 9/102 (0.088)  |
| GM-CSF Signaling                        | 1.52E-03       | 7/62 (0.113)   |
| Actin Cytoskeleton signaling            | 1.73E-03       | 14/218 (0.064) |

**Supp. Table 3C: Top Biological Functions**

| OVCAR2                        |                   |            | OVCA420                             |                   |            |
|-------------------------------|-------------------|------------|-------------------------------------|-------------------|------------|
| Diseases and disorders        |                   |            |                                     |                   |            |
| Name                          | p-value           | #Molecules | Name                                | p-value           | #Molecules |
| Cancer                        | 1.06E-06-8.96E-03 | 209        | Cancer                              | 9.65E-06-1.45E-02 | 164        |
| Reproductive System Disorders | 2.71E-05-6.89E-03 | 70         | Gastrointestinal Disease            | 3.88-05-1.16E-02  | 65         |
| Gastrointestinal Disease      | 6.59E-05-4.39E-03 | 85         | Reproductive system disease         | 4.54-05-1.45E-02  | 49         |
| Endocrine System Disorders    | 8.94E-05-8.96E-03 | 39         | Connective tissue disorders         | 1.16E-04-1.33E-02 | 31         |
| Metabolic Disease             | 8.94E-05-5.61E-03 | 17         | Organismal Injury and Abnormalities | 1.25E-04-1.43E-02 | 26         |

| Molecular and Cellular Functions  |                   |            |                                   |                   |            |
|-----------------------------------|-------------------|------------|-----------------------------------|-------------------|------------|
| Name                              | p-value           | #Molecules | Name                              | p-value           | #Molecules |
| Cellular Growth and Proliferation | 8.52E-08-8.77E-03 | 188        | Cellular growth and Proliferation | 1.18E-08-1.39E-02 | 125        |
| Protein Synthesis                 | 4.42E-06-6.42E-03 | 45         | Cell Morphology                   | 3.43E-07-1.43E-02 | 59         |
| Cell Death                        | 7.76E-06-8.96E-03 | 164        | Cellular Development              | 5.11E-07-1.39E-02 | 66         |
| Cell Cycle                        | 1.70E-05-8.74E-03 | 86         | Cell death                        | 7.12E-07-1.45E-02 | 107        |
| Cellular Development              | 2.17E-05-8.99E-03 | 133        | Cellular Movement                 | 9.65E-07-1.45E-02 | 78         |

| Physiological System development and function        |                   |            |                                                      |                   |            |
|------------------------------------------------------|-------------------|------------|------------------------------------------------------|-------------------|------------|
| Name                                                 | p-value           | #Molecules | Name                                                 | p-value           | #Molecules |
| Hematological System development and Function        | 9.14E-05-7.94E-03 | 96         | Connective tissue development and Function           | 6.88E-06-1.38E-02 | 39         |
| Immune Response                                      | 9.14E-05-7.59E-03 | 97         | Tissue Development                                   | 6.88E-06-1.34E-02 | 39         |
| Connective Tissue development and Function           | 1.06E-05-5.61E-03 | 54         | Hematological System development and Function        | 2.89E-05-1.43E-02 | 45         |
| Immune and Lymphatic System Development and Function | 1.46E-04-7.33E-03 | 80         | Immune Response                                      | 3.45E-05-1.43E-02 | 32         |
| Cardiovascular System Development and Function       | 2.42E-04-8.43E-03 | 46         | Immune and Lymphatic System development and Function | 6.93E-05-1.34E-02 | 34         |

The list includes the annotation of the differentially expressed genes upon knockdown. The likelihood that the association between a set of differentially expressed genes and a given function was due to chance was calculated using the right-tailed Fisher's exact test. The biological functions or processes annotated to affected genes are listed according to their
