# Supplementary material for: Claudin-7 Is Frequently Overexpressed in Ovarian Cancer and Promotes Invasion
Source: PubMed Central journal article supplement (PMC3137611; doi:10.1371/journal.pone.0022119), 2011-07-15
Supplement: pone.0022119.s004.pdf [file pone.0022119.s004.pdf]

**Supp. Table 4A: GO analysis of significantly altered genes in OVCAR2 and OVCA420 after knockdown of Claudin-7 using siRNA**

**OVCAR2**

| Symbol                                       | Gene ID                | Gene Name                                               | Fold change |
|----------------------------------------------|------------------------|---------------------------------------------------------|-------------|
| <u>Genes in structural molecule activity</u> |                        |                                                         |             |
| MRPS30                                       | <a href="#">10884</a>  | mitochondrial ribosomal protein S30                     | -1.6        |
| RPS13                                        | <a href="#">6207</a>   | ribosomal protein S13                                   | -1.53       |
| RPL36AL                                      | <a href="#">6166</a>   | ribosomal protein L36a-like                             | -1.68       |
| MRPL9                                        | <a href="#">65005</a>  | mitochondrial ribosomal protein L9                      | -1.62       |
| DNM3                                         | <a href="#">26052</a>  | dynamamin 3                                             | -1.72       |
| CLDN15                                       | <a href="#">24146</a>  | claudin 15                                              | 1.58        |
| LAMA3                                        | <a href="#">3909</a>   | laminin, alpha 3                                        | -1.99       |
| UPK1B                                        | <a href="#">7348</a>   | uroplakin 1B                                            | -1.74       |
| KRT19                                        | <a href="#">3880</a>   | keratin 19                                              | -1.62       |
| RPS7                                         | <a href="#">6201</a>   | ribosomal protein S7                                    | -2.54       |
| MRPL21                                       | <a href="#">219927</a> | mitochondrial ribosomal protein L21                     | -1.71       |
| ARPC5                                        | <a href="#">10092</a>  | actin related protein 2/3 complex, subunit 5, 16kDa     | -1.52       |
| RPL24                                        | <a href="#">6152</a>   | ribosomal protein L24                                   | -1.88       |
| RPL14                                        | <a href="#">9045</a>   | ribosomal protein L14                                   | -1.58       |
| CLDN7                                        | <a href="#">1366</a>   | claudin 7                                               | -6.97       |
| RPL7L1                                       | <a href="#">285855</a> | ribosomal protein L7-like 1                             | -1.5        |
| MRPL1                                        | <a href="#">65008</a>  | mitochondrial ribosomal protein L1                      | -1.52       |
| RSL1D1                                       | <a href="#">26156</a>  | ribosomal L1 domain containing 1                        | -2.3        |
| MRPS18C                                      | <a href="#">51023</a>  | mitochondrial ribosomal protein S18C                    | -1.59       |
| MRPL36                                       | <a href="#">64979</a>  | mitochondrial ribosomal protein L36                     | 2.2         |
| LLGL1                                        | <a href="#">3996</a>   | lethal giant larvae homolog 1 (Drosophila)              | 1.7         |
| RPS21                                        | <a href="#">6227</a>   | ribosomal protein S21                                   | -1.52       |
| RPL39L                                       | <a href="#">116832</a> | ribosomal protein L39-like                              | -1.56       |
| RPS15                                        | <a href="#">6209</a>   | ribosomal protein S15                                   | -1.84       |
| COL4A2                                       | <a href="#">1284</a>   | collagen, type IV, alpha 2                              | -1.91       |
| MRPS15                                       | <a href="#">64960</a>  | mitochondrial ribosomal protein S15                     | -2.73       |
| ADD3                                         | <a href="#">120</a>    | adducin 3 (gamma)                                       | 1.73        |
| MRPL33                                       | <a href="#">9553</a>   | mitochondrial ribosomal protein L33                     | -1.78       |
| MRPL20                                       | <a href="#">55052</a>  | mitochondrial ribosomal protein L20                     | -1.5        |
| CTHRC1                                       | <a href="#">115908</a> | collagen triple helix repeat containing 1               | -1.92       |
| CLTC                                         | <a href="#">1213</a>   | clathrin, heavy chain (Hc)                              | 1.87        |
| ACTG1                                        | <a href="#">71</a>     | actin, gamma 1                                          | -1.66       |
| COL18A1                                      | <a href="#">80781</a>  | collagen, type XVIII, alpha 1                           | 2.04        |
| PLEC1                                        | <a href="#">5339</a>   | plectin 1, intermediate filament binding protein 500kDa | -1.77       |
| COL4A5                                       | <a href="#">1287</a>   | collagen, type IV, alpha 5 (Alport syndrome)            | 1.71        |
| ANXA1                                        | <a href="#">301</a>    | annexin A1                                              | -1.84       |
| LAMB2                                        | <a href="#">3913</a>   | laminin, beta 2 (laminin S)                             | 1.74        |
| MRPL22                                       | <a href="#">29093</a>  | mitochondrial ribosomal protein L22                     | -1.81       |
| RPL34                                        | <a href="#">6164</a>   | ribosomal protein L34                                   | -2.3        |
| TINAGL1                                      | <a href="#">64129</a>  | tubulointerstitial nephritis antigen-like 1             | -2.94       |
| FLG                                          | <a href="#">2312</a>   | filaggrin                                               | -2.26       |
| MRPS17                                       | <a href="#">51373</a>  | mitochondrial ribosomal protein S17                     | -2.36       |

|                                                     |                        |                                                                                                                  |       |
|-----------------------------------------------------|------------------------|------------------------------------------------------------------------------------------------------------------|-------|
| RPL29                                               | <a href="#">6159</a>   | ribosomal protein L29                                                                                            | -2.4  |
| FBLN1                                               | <a href="#">2192</a>   | fibulin 1                                                                                                        | 1.84  |
| RPL4                                                | <a href="#">6124</a>   | ribosomal protein L4                                                                                             | -1.5  |
| CAV1                                                | <a href="#">857</a>    | caveolin 1, caveolae protein, 22kDa                                                                              | -1.6  |
| <a href="#">Genes in signal transducer activity</a> |                        |                                                                                                                  |       |
| FOLR3                                               | <a href="#">2352</a>   | folate receptor 3 (gamma)                                                                                        | -2.65 |
| PGRMC1                                              | <a href="#">10857</a>  | progesterone receptor membrane component 1                                                                       | 1.57  |
| SEMA4D                                              | <a href="#">10507</a>  | sema domain, immunoglobulin domain (Ig), transmembrane domain (TM) and short cytoplasmic domain, (semaphorin) 4D | 1.58  |
| DDR1                                                | <a href="#">780</a>    | discoidin domain receptor family, member 1                                                                       | 1.79  |
| TSPAN6                                              | <a href="#">7105</a>   | tetraspanin 6                                                                                                    | 1.6   |
| PRKCD                                               | <a href="#">5580</a>   | protein kinase C, delta                                                                                          | 1.52  |
| TOMM22                                              | <a href="#">56993</a>  | translocase of outer mitochondrial membrane 22 homolog (yeast)                                                   | -1.59 |
| LPHN1                                               | <a href="#">22859</a>  | latrophilin 1                                                                                                    | 1.76  |
| RAF1                                                | <a href="#">5894</a>   | v-raf-1 murine leukemia viral oncogene homolog 1                                                                 | 2.27  |
| DEDD2                                               | <a href="#">162989</a> | death effector domain containing 2                                                                               | 1.54  |
| CXCR4                                               | <a href="#">7852</a>   | chemokine (C-X-C motif) receptor 4                                                                               | -1.77 |
| LRP10                                               | <a href="#">26020</a>  | low density lipoprotein receptor-related protein 10                                                              | 2.28  |
| PLXNB1                                              | <a href="#">5364</a>   | plexin B1                                                                                                        | 1.82  |
| IGF2R                                               | <a href="#">3482</a>   | insulin-like growth factor 2 receptor                                                                            | 1.88  |
| DKK1                                                | <a href="#">22943</a>  | dickkopf homolog 1 (Xenopus laevis)                                                                              | 2.09  |
| PRKRA                                               | <a href="#">8575</a>   | protein kinase, interferon-inducible double stranded RNA dependent activator                                     | -1.58 |
| NCK2                                                | <a href="#">8440</a>   | NCK adaptor protein 2                                                                                            | 1.54  |
| LBR                                                 | <a href="#">3930</a>   | lamin B receptor                                                                                                 | 1.56  |
| SRPR                                                | <a href="#">6734</a>   | signal recognition particle receptor ('docking protein')                                                         | -1.85 |
| MAP3K7                                              | <a href="#">6885</a>   | mitogen-activated protein kinase kinase kinase 7                                                                 | -1.53 |
| CDK2AP1                                             | <a href="#">8099</a>   | CDK2-associated protein 1                                                                                        | 2.02  |
| IQWD1                                               | <a href="#">55827</a>  | IQ motif and WD repeats 1                                                                                        | 1.75  |
| FGFR3                                               | <a href="#">2261</a>   | fibroblast growth factor receptor 3 (achondroplasia, thanatophoric dwarfism)                                     | 2.39  |
| PAQR8                                               | <a href="#">85315</a>  | progesterone and adipoQ receptor family member VIII                                                              | 2.02  |
| LGALS3BP                                            | <a href="#">3959</a>   | lectin, galactoside-binding, soluble, 3 binding protein                                                          | 1.52  |
| IL4R                                                | <a href="#">3566</a>   | interleukin 4 receptor                                                                                           | 1.66  |
| MET                                                 | <a href="#">4233</a>   | met proto-oncogene (hepatocyte growth factor receptor)                                                           | 1.8   |
| NR1H2                                               | <a href="#">7376</a>   | nuclear receptor subfamily 1, group H, member 2                                                                  | 1.91  |
| STAT5B                                              | <a href="#">6777</a>   | signal transducer and activator of transcription 5B                                                              | 1.6   |
| TNFSF10                                             | <a href="#">8743</a>   | tumor necrosis factor (ligand) superfamily, member 10                                                            | 2.04  |
| FZD2                                                | <a href="#">2535</a>   | frizzled homolog 2 (Drosophila)                                                                                  | 2.64  |
| IFNGR1                                              | <a href="#">3459</a>   | interferon gamma receptor 1                                                                                      | 1.67  |
| MAPK6                                               | <a href="#">5597</a>   | mitogen-activated protein kinase 6                                                                               | 1.87  |
| NCOA7                                               | <a href="#">135112</a> | nuclear receptor coactivator 7                                                                                   | 2.55  |
| TNFRSF14                                            | <a href="#">8764</a>   | tumor necrosis factor receptor superfamily, member 14 (herpesvirus entry mediator)                               | 1.65  |
| ITPR3                                               | <a href="#">3710</a>   | inositol 1,4,5-triphosphate receptor, type 3                                                                     | 2.48  |
| CXADR                                               | <a href="#">1525</a>   | coxsackie virus and adenovirus receptor                                                                          | 2.27  |
| NR2F6                                               | <a href="#">2063</a>   | nuclear receptor subfamily 2, group F, member 6                                                                  | 1.56  |
| SORT1                                               | <a href="#">6272</a>   | sortilin 1                                                                                                       | 1.62  |
| SCARB2                                              | <a href="#">950</a>    | scavenger receptor class B, member 2                                                                             | 2.14  |
| IFITM1                                              | <a href="#">8519</a>   | interferon induced transmembrane protein 1 (9-27)                                                                | 1.76  |
| DGCR2                                               | <a href="#">9993</a>   | DiGeorge syndrome critical region gene 2                                                                         | 1.52  |

|                                                  |                        |                                                                                         |       |
|--------------------------------------------------|------------------------|-----------------------------------------------------------------------------------------|-------|
| PLXNA1                                           | <a href="#">5361</a>   | plexin A1                                                                               | 1.66  |
| S100A9                                           | <a href="#">6280</a>   | S100 calcium binding protein A9                                                         | 1.64  |
| CCBP2                                            | <a href="#">1238</a>   | chemokine binding protein 2                                                             | 1.66  |
| FCGRT                                            | <a href="#">2217</a>   | Fc fragment of IgG, receptor, transporter, alpha                                        | 1.84  |
| TNFRSF12A                                        | <a href="#">51330</a>  | tumor necrosis factor receptor superfamily, member 12A                                  | -1.82 |
| PVRL2                                            | <a href="#">5819</a>   | poliovirus receptor-related 2 (herpesvirus entry mediator B)                            | 1.82  |
| PRKCZ                                            | <a href="#">5590</a>   | protein kinase C, zeta                                                                  | 2.71  |
| LMBR1L                                           | <a href="#">55716</a>  | limb region 1 homolog (mouse)-like                                                      | 1.83  |
| IRAK2                                            | <a href="#">3656</a>   | interleukin-1 receptor-associated kinase 2                                              | 1.53  |
| GNAI2                                            | <a href="#">2771</a>   | guanine nucleotide binding protein (G protein), alpha inhibiting activity polypeptide 2 | 1.9   |
| <u>Genes in transcription regulator activity</u> |                        |                                                                                         |       |
| CREG1                                            | <a href="#">8804</a>   | cellular repressor of E1A-stimulated genes 1                                            | 1.98  |
| TSC22D3                                          | <a href="#">1831</a>   | TSC22 domain family, member 3                                                           | 1.58  |
| CEBPD                                            | <a href="#">1052</a>   | CCAAT/enhancer binding protein (C/EBP), delta                                           | 1.92  |
| E2F4                                             | <a href="#">1874</a>   | E2F transcription factor 4, p107/p130-binding                                           | -1.66 |
| CEBPB                                            | <a href="#">1051</a>   | CCAAT/enhancer binding protein (C/EBP), beta                                            | 1.95  |
| FOXC1                                            | <a href="#">2296</a>   | forkhead box C1                                                                         | 1.71  |
| IFI16                                            | <a href="#">3428</a>   | interferon, gamma-inducible protein 16                                                  | 2.21  |
| FOXQ1                                            | <a href="#">94234</a>  | forkhead box Q1                                                                         | 2.55  |
| GTF2E2                                           | <a href="#">2961</a>   | general transcription factor IIE, polypeptide 2, beta 34kDa                             | -1.88 |
| LASS2                                            | <a href="#">29956</a>  | LAG1 homolog, ceramide synthase 2 (S. cerevisiae)                                       | -1.57 |
| ID2                                              | <a href="#">3398</a>   | inhibitor of DNA binding 2, dominant negative helix-loop-helix                          | 1.68  |
| DNM2                                             | <a href="#">1785</a>   | dynamain 2                                                                              | 1.7   |
| HOXB4                                            | <a href="#">3214</a>   | homeobox B4                                                                             | 1.59  |
| BOLA3                                            | <a href="#">388962</a> | bolA homolog 3 (E. coli)                                                                | -1.61 |
| TRFP                                             | <a href="#">9477</a>   | Trf (TATA binding protein-related factor)-proximal homolog (Drosophila)                 | -1.5  |
| ID1                                              | <a href="#">3397</a>   | protein                                                                                 | 1.86  |
| ZNF447                                           | <a href="#">65982</a>  | zinc finger protein 447                                                                 | 1.73  |
| FOSL1                                            | <a href="#">8061</a>   | FOS-like antigen 1                                                                      | -2.57 |
| RPL7L1                                           | <a href="#">285855</a> | ribosomal protein L7-like 1                                                             | -1.5  |
| MSRB2                                            | <a href="#">22921</a>  | methionine sulfoxide reductase B2                                                       | 1.64  |
| FOXJ3                                            | <a href="#">22887</a>  | forkhead box J3                                                                         | 1.64  |
| MTA3                                             | <a href="#">57504</a>  | metastasis associated 1 family, member 3                                                | 1.58  |
| ELL                                              | <a href="#">8178</a>   | elongation factor RNA polymerase II                                                     | 1.59  |
| IRF8                                             | <a href="#">3394</a>   | interferon regulatory factor 8                                                          | -1.87 |
| TEAD2                                            | <a href="#">8463</a>   | TEA domain family member 2                                                              | 3.73  |
| CREB3L2                                          | <a href="#">64764</a>  | cAMP responsive element binding protein 3-like 2                                        | 3.19  |
| ILF3                                             | <a href="#">3609</a>   | interleukin enhancer binding factor 3, 90kDa                                            | 1.59  |
| SREBF1                                           | <a href="#">6720</a>   | sterol regulatory element binding transcription factor 1                                | 1.64  |
| TRIP4                                            | <a href="#">9325</a>   | thyroid hormone receptor interactor 4                                                   | -1.51 |
| NR1H2                                            | <a href="#">7376</a>   | nuclear receptor subfamily 1, group H, member 2                                         | 1.91  |
| STAT5B                                           | <a href="#">6777</a>   | signal transducer and activator of transcription 5B                                     | 1.6   |
| MXD4                                             | <a href="#">10608</a>  | MAX dimerization protein 4                                                              | 1.99  |
| TGIF2                                            | <a href="#">60436</a>  | TGFB-induced factor 2 (TALE family homeobox)                                            | 1.7   |
| NFIL3                                            | <a href="#">4783</a>   | nuclear factor, interleukin 3 regulated                                                 | 1.84  |
| NR2F6                                            | <a href="#">2063</a>   | nuclear receptor subfamily 2, group F, member 6                                         | 1.56  |
| FHL2                                             | <a href="#">2274</a>   | four and a half LIM domains 2                                                           | -1.51 |
| RAN                                              | <a href="#">5901</a>   | RAN, member RAS oncogene family                                                         | 1.75  |
| PHB                                              | <a href="#">5245</a>   | prohibitin                                                                              | -1.56 |

|                                                         |                       |                                                                                                   |       |
|---------------------------------------------------------|-----------------------|---------------------------------------------------------------------------------------------------|-------|
| APEX1                                                   | <a href="#">328</a>   | APEX nuclease (multifunctional DNA repair enzyme) 1                                               | -1.6  |
| ARID1A                                                  | <a href="#">8289</a>  | AT rich interactive domain 1A (SWI- like)                                                         | 1.91  |
| HOXA5                                                   | <a href="#">3202</a>  | homeobox A5                                                                                       | 2.25  |
| DSCR1                                                   | <a href="#">1827</a>  | Down syndrome critical region gene 1                                                              | 2.15  |
| ZNF219                                                  | <a href="#">51222</a> | zinc finger protein 219                                                                           | 1.68  |
| SMARCA4                                                 | <a href="#">6597</a>  | SWI/SNF related, matrix associated, actin dependent regulator of chromatin, subfamily a, member 4 | 1.81  |
| ZFP36L1                                                 | <a href="#">677</a>   | zinc finger protein 36, C3H type-like 1                                                           | 1.6   |
| PCGF2                                                   | <a href="#">7703</a>  | polycomb group ring finger 2                                                                      | 1.72  |
| TAF10                                                   | <a href="#">6881</a>  | TAF10 RNA polymerase II, TATA box binding protein (TBP)-associated factor, 30kDa                  | 1.54  |
| E2F6                                                    | <a href="#">1876</a>  | E2F transcription factor 6                                                                        | 1.55  |
| PA2G4                                                   | <a href="#">5036</a>  | proliferation-associated 2G4, 38kDa                                                               | -1.82 |
| TFAP2A                                                  | <a href="#">7020</a>  | transcription factor AP-2 alpha (activating enhancer binding protein 2 alpha)                     | 1.92  |
| HOXA2                                                   | <a href="#">3199</a>  | homeobox A2                                                                                       | 1.82  |
| SUPT4H1                                                 | <a href="#">6827</a>  | suppressor of Ty 4 homolog 1 (S. cerevisiae)                                                      | 1.7   |
| IRF1                                                    | <a href="#">3659</a>  | interferon regulatory factor 1                                                                    | 1.51  |
| TSC22D4                                                 | <a href="#">81628</a> | TSC22 domain family, member 4                                                                     | 1.56  |
| PIAS3                                                   | <a href="#">10401</a> | protein inhibitor of activated STAT, 3                                                            | 1.61  |
| EDF1                                                    | <a href="#">8721</a>  | endothelial differentiation-related factor 1                                                      | -1.55 |
| <a href="#">Genes in translation regulator activity</a> |                       |                                                                                                   |       |
| EIF2A                                                   | <a href="#">83939</a> | eukaryotic translation initiation factor 2A, 65kDa                                                | -1.61 |
| EIF3S7                                                  | <a href="#">8664</a>  | eukaryotic translation initiation factor 3, subunit 7 zeta, 66/67kDa                              | -1.82 |
| EIF4A2                                                  | <a href="#">1974</a>  | eukaryotic translation initiation factor 4A, isoform 2                                            | -1.53 |
| MRPL9                                                   | <a href="#">65005</a> | mitochondrial ribosomal protein L9                                                                | -1.62 |
| ITGB4BP                                                 | <a href="#">3692</a>  | integrin beta 4 binding protein                                                                   | -1.75 |
| GFM1                                                    | <a href="#">85476</a> | G elongation factor, mitochondrial 1                                                              | -1.54 |
| EEF1A2                                                  | <a href="#">1917</a>  | eukaryotic translation elongation factor 1 alpha 2                                                | 1.52  |
| EIF2B1                                                  | <a href="#">1967</a>  | eukaryotic translation initiation factor 2B, subunit 1 alpha, 26kDa                               | -1.97 |
| EIF2B2                                                  | <a href="#">8892</a>  | eukaryotic translation initiation factor 2B, subunit 2 beta, 39kDa                                | -1.68 |
| MTIF2                                                   | <a href="#">4528</a>  | mitochondrial translational initiation factor 2                                                   | -1.6  |
| ICT1                                                    | <a href="#">3396</a>  | immature colon carcinoma transcript 1                                                             | -1.57 |
| <a href="#">Genes in transporter activity</a>           |                       |                                                                                                   |       |
| UQCRC2                                                  | <a href="#">7385</a>  | ubiquinol-cytochrome c reductase core protein II                                                  | -1.88 |
| KPNA3                                                   | <a href="#">3839</a>  | karyopherin alpha 3 (importin alpha 4)                                                            | -1.55 |
| SEC61A1                                                 | <a href="#">29927</a> | Sec61 alpha 1 subunit (S. cerevisiae)                                                             | 1.74  |
| SLC5A6                                                  | <a href="#">8884</a>  | solute carrier family 5 (sodium-dependent vitamin transporter), member 6                          | -1.65 |
| ATP5I                                                   | <a href="#">521</a>   | ATP synthase, H <sup>+</sup> transporting, mitochondrial F0 complex, subunit E                    | -1.54 |
| TRPC6                                                   | <a href="#">7225</a>  | transient receptor potential cation channel, subfamily C, member 6                                | 2.35  |
| PLSCR1                                                  | <a href="#">5359</a>  | phospholipid scramblase 1                                                                         | -1.64 |
| COX6B1                                                  | <a href="#">1340</a>  | cytochrome c oxidase subunit Vib polypeptide 1 (ubiquitous)                                       | -1.51 |
| KCNS1                                                   | <a href="#">3787</a>  | member 1                                                                                          | -1.79 |
| ATP5H                                                   | <a href="#">10476</a> | ATP synthase, H <sup>+</sup> transporting, mitochondrial F0 complex, subunit d                    | -1.54 |
| SFXN1                                                   | <a href="#">94081</a> | sideroflexin 1                                                                                    | 1.6   |
| TOMM7                                                   | <a href="#">54543</a> | translocase of outer mitochondrial membrane 7 homolog (yeast)                                     | -1.52 |
| SYTL2                                                   | <a href="#">54843</a> | synaptotagmin-like 2                                                                              | -2.81 |
| IGF2R                                                   | <a href="#">3482</a>  | insulin-like growth factor 2 receptor                                                             | 1.88  |
| SLC17A5                                                 | <a href="#">26503</a> | solute carrier family 17 (anion/sugar transporter), member 5                                      | 1.52  |

|          |                        |                                                                                             |       |
|----------|------------------------|---------------------------------------------------------------------------------------------|-------|
| SLC35B1  | <a href="#">10237</a>  | solute carrier family 35, member B1                                                         | 2.73  |
| ATP6AP1  | <a href="#">537</a>    | ATPase, H <sup>+</sup> transporting, lysosomal accessory protein 1                          | 2.12  |
| SLC11A2  | <a href="#">4891</a>   | solute carrier family 11 (proton-coupled divalent metal ion transporters), member 2         | 1.63  |
| AP3D1    | <a href="#">8943</a>   | adaptor-related protein complex 3, delta 1 subunit                                          | 1.6   |
| ATG9A    | <a href="#">79065</a>  | ATG9 autophagy related 9 homolog A ( <i>S. cerevisiae</i> )                                 | 1.72  |
| SLC25A22 | <a href="#">79751</a>  | solute carrier family 25 (mitochondrial carrier: glutamate), member 22                      | 1.85  |
| TSNAX    | <a href="#">7257</a>   | translin-associated factor X                                                                | -1.56 |
| SLC39A6  | <a href="#">25800</a>  | solute carrier family 39 (zinc transporter), member 6                                       | 2.1   |
| ATP1B3   | <a href="#">483</a>    | ATPase, Na <sup>+</sup> /K <sup>+</sup> transporting, beta 3 polypeptide                    | 1.63  |
| COPB2    | <a href="#">9276</a>   | coatamer protein complex, subunit beta 2 (beta prime)                                       | 2.03  |
| VDAC2    | <a href="#">7417</a>   | voltage-dependent anion channel 2                                                           | -1.73 |
| ITPR3    | <a href="#">3710</a>   | inositol 1,4,5-triphosphate receptor, type 3                                                | 2.48  |
| TM9SF4   | <a href="#">9777</a>   | transmembrane 9 superfamily protein member 4                                                | 1.91  |
| SORT1    | <a href="#">6272</a>   | sortilin 1                                                                                  | 1.62  |
| ATP5O    | <a href="#">539</a>    | ATP synthase, H <sup>+</sup> transporting, mitochondrial F1 complex, O subunit              | -1.5  |
| ATP5G1   | <a href="#">516</a>    | ATP synthase, H <sup>+</sup> transporting, mitochondrial F0 complex, subunit C1 (subunit 9) | -2.03 |
| SLC37A1  | <a href="#">54020</a>  | solute carrier family 37 (glycerol-3-phosphate transporter), member 1                       | 2.11  |
| TMCO3    | <a href="#">55002</a>  | transmembrane and coiled-coil domains 3                                                     | 1.66  |
| SLCO2A1  | <a href="#">6578</a>   | solute carrier organic anion transporter family, member 2A1                                 | 2.85  |
| AP2M1    | <a href="#">1173</a>   | adaptor-related protein complex 2, mu 1 subunit                                             | 1.62  |
| SLC29A4  | <a href="#">222962</a> | solute carrier family 29 (nucleoside transporters), member 4                                | 2.12  |
| TOMM20   | <a href="#">9804</a>   | translocase of outer mitochondrial membrane 20 homolog (yeast)                              | -1.93 |
| APOE     | <a href="#">348</a>    | apolipoprotein E                                                                            | 4.02  |
| ARFGAP3  | <a href="#">26286</a>  | ADP-ribosylation factor GTPase activating protein 3                                         | 1.8   |

## OVCA420

| Symbol                                       | Gene ID                | Gene Name                                    | Fold change |
|----------------------------------------------|------------------------|----------------------------------------------|-------------|
| <u>Genes in structural molecule activity</u> |                        |                                              |             |
| MRPL36                                       | <a href="#">64979</a>  | mitochondrial ribosomal protein L36          | 3.06        |
| LAMB1                                        | <a href="#">3912</a>   | laminin, beta 1                              | 1.91        |
| TUBA1                                        | <a href="#">7277</a>   | tubulin, alpha 1                             | 1.72        |
| KRT20                                        | <a href="#">54474</a>  | keratin 20                                   | 1.71        |
| COL4A5                                       | <a href="#">1287</a>   | collagen, type IV, alpha 5 (Alport syndrome) | 1.68        |
| COL17A1                                      | <a href="#">1308</a>   | collagen, type XVII, alpha 1                 | 1.61        |
| TUBB                                         | <a href="#">203068</a> | tubulin, beta                                | 1.6         |
| MSN                                          | <a href="#">4478</a>   | moesin                                       | 1.6         |
| CLDN15                                       | <a href="#">24146</a>  | claudin 15                                   | 1.57        |
| JAG1                                         | <a href="#">182</a>    | jagged 1 (Alagille syndrome)                 | 1.56        |
| MRPL22                                       | <a href="#">29093</a>  | mitochondrial ribosomal protein L22          | -1.5        |
| KRT19                                        | <a href="#">3880</a>   | keratin 19                                   | -1.5        |
| PPL                                          | <a href="#">5493</a>   | periplakin                                   | -1.5        |
| RPS6                                         | <a href="#">6194</a>   | ribosomal protein S6                         | -1.51       |
| RPS13                                        | <a href="#">6207</a>   | ribosomal protein S13                        | -1.53       |
| RPL39L                                       | <a href="#">116832</a> | ribosomal protein L39-like                   | -1.54       |
| RPS5                                         | <a href="#">6193</a>   | ribosomal protein S5                         | -1.55       |

|                                            |                        |                                                                                               |       |
|--------------------------------------------|------------------------|-----------------------------------------------------------------------------------------------|-------|
| MRPS9                                      | <a href="#">64965</a>  | mitochondrial ribosomal protein S9                                                            | -1.56 |
| RPL4                                       | <a href="#">6124</a>   | ribosomal protein L4                                                                          | -1.56 |
| SPRR1A                                     | <a href="#">6698</a>   | small proline-rich protein 1A                                                                 | -1.57 |
| TUFT1                                      | <a href="#">7286</a>   | tuftelin 1                                                                                    | -1.66 |
| MRPS15                                     | <a href="#">64960</a>  | mitochondrial ribosomal protein S15                                                           | -1.76 |
| KRT18                                      | <a href="#">3875</a>   | keratin 18                                                                                    | -1.79 |
| ACTB                                       | <a href="#">60</a>     | actin, beta                                                                                   | -1.79 |
| ACTG1                                      | <a href="#">71</a>     | actin, gamma 1                                                                                | -1.81 |
| KRT8                                       | <a href="#">3856</a>   | keratin 8                                                                                     | -2.26 |
| SPRR3                                      | <a href="#">6707</a>   | small proline-rich protein 3                                                                  | -4.66 |
| CLDN7                                      | <a href="#">1366</a>   | claudin 7                                                                                     | -6.88 |
| <u>Genes in signal transducer activity</u> |                        |                                                                                               |       |
| SH3BP4                                     | <a href="#">23677</a>  | SH3-domain binding protein 4                                                                  | 1.58  |
| DKK1                                       | <a href="#">22943</a>  | dickkopf homolog 1 (Xenopus laevis)                                                           | 2.87  |
| FGFRL1                                     | <a href="#">53834</a>  | fibroblast growth factor receptor-like 1                                                      | 1.65  |
| ATRN                                       | <a href="#">8455</a>   | attractin                                                                                     | 1.51  |
| SCARB1                                     | <a href="#">949</a>    | scavenger receptor class B, member 1                                                          | 2.34  |
| TMEM123                                    | <a href="#">114908</a> | transmembrane protein 123                                                                     | 1.55  |
| ITGAV                                      | <a href="#">3685</a>   | integrin, alpha V (vitronectin receptor, alpha polypeptide, antigen                           | 1.51  |
| IGF2R                                      | <a href="#">3482</a>   | insulin-like growth factor 2 receptor                                                         | 1.65  |
| TOLLIP                                     | <a href="#">54472</a>  | toll interacting protein                                                                      | 1.54  |
| SEMA3B                                     | <a href="#">7869</a>   | sema domain, immunoglobulin domain (Ig), short basic domain, secreted, (semaphorin) 3B        | -1.86 |
| MAPK6                                      | <a href="#">5597</a>   | mitogen-activated protein kinase 6                                                            | 2.15  |
| SRPRB                                      | <a href="#">58477</a>  | signal recognition particle receptor, B subunit                                               | 1.63  |
| M6PR                                       | <a href="#">4074</a>   | mannose-6-phosphate receptor (cation dependent)                                               | 1.54  |
| F3                                         | <a href="#">2152</a>   | coagulation factor III (thromboplastin, tissue factor)                                        | -2.08 |
| MAPK3                                      | <a href="#">5595</a>   | mitogen-activated protein kinase 3                                                            | -1.73 |
| CDK2AP1                                    | <a href="#">8099</a>   | CDK2-associated protein 1                                                                     | 1.77  |
| GJA1                                       | <a href="#">2697</a>   | gap junction protein, alpha 1, 43kDa (connexin 43)                                            | 1.64  |
| PDCD6IP                                    | <a href="#">10015</a>  | programmed cell death 6 interacting protein                                                   | -1.71 |
| WNT7A                                      | <a href="#">7476</a>   | wingless-type MMTV integration site family, member 7A                                         | 1.72  |
| CRY1                                       | <a href="#">1407</a>   | cryptochrome 1 (photolyase-like)                                                              | 1.73  |
| NEO1                                       | <a href="#">4756</a>   | neogenin homolog 1 (chicken)                                                                  | 1.51  |
| IL10RB                                     | <a href="#">3588</a>   | interleukin 10 receptor, beta                                                                 | -1.56 |
| CXADR                                      | <a href="#">1525</a>   | coxsackie virus and adenovirus receptor                                                       | 2.15  |
| MET                                        | <a href="#">4233</a>   | met proto-oncogene (hepatocyte growth factor receptor)                                        | 1.89  |
| GPR92                                      | <a href="#">57121</a>  | G protein-coupled receptor 92                                                                 | -1.86 |
| TNFRSF14                                   | <a href="#">8764</a>   | tumor necrosis factor receptor superfamily, member 14 (herpesvirus entry mediator)            | -1.84 |
| C1S                                        | <a href="#">716</a>    | complement component 1, s subcomponent                                                        | 2.36  |
| WNT5A                                      | <a href="#">7474</a>   | wingless-type MMTV integration site family, member 5A                                         | 1.67  |
| NETO2                                      | <a href="#">81831</a>  | neuropilin (NRP) and tolloid (TLL)-like 2                                                     | 2.04  |
| HMOX1                                      | <a href="#">3162</a>   | heme oxygenase (decycling) 1                                                                  | 1.52  |
| ITGB6                                      | <a href="#">3694</a>   | integrin, beta 6                                                                              | 1.54  |
| RAF1                                       | <a href="#">5894</a>   | v-raf-1 murine leukemia viral oncogene homolog 1                                              | 1.72  |
| PVR                                        | <a href="#">5817</a>   | poliovirus receptor                                                                           | 1.57  |
| LGR4                                       | <a href="#">55366</a>  | leucine-rich repeat-containing G protein-coupled receptor 4                                   | -2.06 |
| LMBR1L                                     | <a href="#">55716</a>  | limb region 1 homolog (mouse)-like                                                            | 1.76  |
| GRINA                                      | <a href="#">2907</a>   | glutamate receptor, ionotropic, N-methyl D-aspartate-associated protein 1 (glutamate binding) | 2.03  |

|                                                           |                       |                                                                                                   |       |
|-----------------------------------------------------------|-----------------------|---------------------------------------------------------------------------------------------------|-------|
| F2RL1                                                     | <a href="#">2150</a>  | coagulation factor II (thrombin) receptor-like 1                                                  | -1.53 |
| <a href="#">Genes in transcription regulator activity</a> |                       |                                                                                                   |       |
| NRG1                                                      | <a href="#">3084</a>  | neuregulin 1                                                                                      | 2.69  |
| RAN                                                       | <a href="#">5901</a>  | RAN, member RAS oncogene family                                                                   | 2.02  |
| TEAD2                                                     | <a href="#">8463</a>  | TEA domain family member 2                                                                        | 1.99  |
| CREG1                                                     | <a href="#">8804</a>  | cellular repressor of E1A-stimulated genes 1                                                      | 1.97  |
| IFI16                                                     | <a href="#">3428</a>  | interferon, gamma-inducible protein 16                                                            | 1.95  |
| ZFP36L1                                                   | <a href="#">677</a>   | zinc finger protein 36, C3H type-like 1                                                           | 1.92  |
| CBX2                                                      | <a href="#">84733</a> | chromobox homolog 2 (Pc class homolog, Drosophila)                                                | 1.86  |
| E2F2                                                      | <a href="#">1870</a>  | E2F transcription factor 2                                                                        | 1.85  |
| GABPB2                                                    | <a href="#">2553</a>  | GA binding protein transcription factor, beta subunit 2                                           | 1.8   |
| TP73L                                                     | <a href="#">8626</a>  | tumor protein p73-like                                                                            | 1.72  |
| E2F3                                                      | <a href="#">1871</a>  | E2F transcription factor 3                                                                        | 1.6   |
| FOXJ3                                                     | <a href="#">22887</a> | forkhead box J3                                                                                   | 1.6   |
| GTF3A                                                     | <a href="#">2971</a>  | general transcription factor IIIA                                                                 | 1.59  |
| CEBPG                                                     | <a href="#">1054</a>  | CCAAT/enhancer binding protein (C/EBP), gamma                                                     | 1.57  |
| SMARCA4                                                   | <a href="#">6597</a>  | SWI/SNF related, matrix associated, actin dependent regulator of chromatin, subfamily a, member 4 | 1.56  |
| E2F6                                                      | <a href="#">1876</a>  | E2F transcription factor 6                                                                        | 1.56  |
| ZNF219                                                    | <a href="#">51222</a> | zinc finger protein 219                                                                           | 1.55  |
| CREB3L2                                                   | <a href="#">64764</a> | cAMP responsive element binding protein 3-like 2                                                  | 1.53  |
| NFE2L3                                                    | <a href="#">9603</a>  | nuclear factor (erythroid-derived 2)-like 3                                                       | 1.52  |
| ILF3                                                      | <a href="#">3609</a>  | interleukin enhancer binding factor 3, 90kDa                                                      | 1.52  |
| NFIL3                                                     | <a href="#">4783</a>  | nuclear factor, interleukin 3 regulated                                                           | 1.51  |
| SUPT4H1                                                   | <a href="#">6827</a>  | suppressor of Ty 4 homolog 1 (S. cerevisiae)                                                      | 1.5   |
| ETS1                                                      | <a href="#">2113</a>  | v-ets erythroblastosis virus E26 oncogene homolog 1 (avian)                                       | 1.5   |
| CITED2                                                    | <a href="#">10370</a> | Cbp/p300-interacting transactivator, with Glu/Asp-rich carboxy-terminal domain, 2                 | -1.51 |
| NMI                                                       | <a href="#">9111</a>  | N-myc (and STAT) interactor                                                                       | -1.6  |
| ELF3                                                      | <a href="#">1999</a>  | E74-like factor 3 (ets domain transcription factor, epithelial-specific )                         | -1.61 |
| HOXB5                                                     | <a href="#">3215</a>  | homeobox B5                                                                                       | -1.65 |
| TSC22D3                                                   | <a href="#">1831</a>  | TSC22 domain family, member 3                                                                     | -1.86 |
| <a href="#">Genes in translation regulator activity</a>   |                       |                                                                                                   |       |
| EEF1A2                                                    | <a href="#">1917</a>  | eukaryotic translation elongation factor 1 alpha 2                                                | 2.29  |
| PET112L                                                   | <a href="#">5188</a>  | PET112-like (yeast)                                                                               | -1.55 |
| EIF4A2                                                    | <a href="#">1974</a>  | eukaryotic translation initiation factor 4A, isoform 2                                            | -1.83 |
| <a href="#">Genes in transporter activity</a>             |                       |                                                                                                   |       |
| TNFAIP1                                                   | <a href="#">7126</a>  | tumor necrosis factor, alpha-induced protein 1 (endothelial)                                      | 1.5   |
| SLC22A18                                                  | <a href="#">5002</a>  | solute carrier family 22 (organic cation transporter), member 18                                  | -1.51 |
| PLSCR1                                                    | <a href="#">5359</a>  | phospholipid scramblase 1                                                                         | -1.55 |
| SLC16A5                                                   | <a href="#">9121</a>  | solute carrier family 16, member 5 (monocarboxylic acid transporter)                              | -1.92 |
| AP2M1                                                     | <a href="#">1173</a>  | adaptor-related protein complex 2, mu 1 subunit                                                   | 1.52  |
| SCNN1A                                                    | <a href="#">6337</a>  | sodium channel, nonvoltage-gated 1 alpha                                                          | -1.64 |
| SLC25A22                                                  | <a href="#">79751</a> | solute carrier family 25 (mitochondrial carrier: glutamate), member 22                            | 3.18  |
| TMCO3                                                     | <a href="#">55002</a> | transmembrane and coiled-coil domains 3                                                           | 1.72  |
| KIAA0528                                                  | <a href="#">9847</a>  | KIAA0528                                                                                          | -1.52 |
| PHGDH                                                     | <a href="#">26227</a> | phosphoglycerate dehydrogenase                                                                    | 2.1   |
| SCARB1                                                    | <a href="#">949</a>   | scavenger receptor class B, member 1                                                              | 2.34  |
| IGF2R                                                     | <a href="#">3482</a>  | insulin-like growth factor 2 receptor                                                             | 1.65  |
| ABCA1                                                     | <a href="#">19</a>    | ATP-binding cassette, sub-family A (ABC1), member 1                                               | 1.64  |
| SEC61A1                                                   | <a href="#">29927</a> | Sec61 alpha 1 subunit (S. cerevisiae)                                                             | 1.71  |

|         |                       |                                                                                |       |
|---------|-----------------------|--------------------------------------------------------------------------------|-------|
| GJA1    | <a href="#">2697</a>  | gap junction protein, alpha 1, 43kDa (connexin 43)                             | 1.64  |
| M6PR    | <a href="#">4074</a>  | mannose-6-phosphate receptor (cation dependent)                                | 1.54  |
| FXYD3   | <a href="#">5349</a>  | FXYD domain containing ion transport regulator 3                               | -1.94 |
| SLC38A1 | <a href="#">81539</a> | solute carrier family 38, member 1                                             | 1.53  |
| ATP5H   | <a href="#">10476</a> | ATP synthase, H <sup>+</sup> transporting, mitochondrial F0 complex, subunit d | -1.5  |
| ATP1B3  | <a href="#">483</a>   | ATPase, Na <sup>+</sup> /K <sup>+</sup> transporting, beta 3 polypeptide       | 1.59  |
| SLC35B1 | <a href="#">10237</a> | solute carrier family 35, member B1                                            | 2.14  |
| ATG9A   | <a href="#">79065</a> | ATG9 autophagy related 9 homolog A ( <i>S. cerevisiae</i> )                    | 1.51  |
| SLC37A4 | <a href="#">2542</a>  | solute carrier family 37 (glycerol-6-phosphate transporter), member 4          | -1.68 |
| KCNS1   | <a href="#">3787</a>  | potassium voltage-gated channel, delayed-rectifier, subfamily S,               | -1.81 |
| SLC39A6 | <a href="#">25800</a> | solute carrier family 39 (zinc transporter), member 6                          | 1.99  |
