# Supplementary material for: Claudin-7 Is Frequently Overexpressed in Ovarian Cancer and Promotes Invasion
Source: PubMed Central journal article supplement (PMC3137611; doi:10.1371/journal.pone.0022119), 2011-07-15
Supplement: pone.0022119.s005.pdf [file pone.0022119.s005.pdf]

**Supp Table 5: Webgestalt analysis**

**OVCA420**

| KEGG pathway                                           | Gene number | Enrichment                       |
|--------------------------------------------------------|-------------|----------------------------------|
| <a href="#">Regulation of actin cytoskeleton</a>       | 16          | O=16;E=3.9463;R=4.0544;P=5.54e-6 |
| <a href="#">Cytokine-cytokine receptor interaction</a> | 16          | O=16;E=4.8478;R=3.3005;P=5.87e-5 |
| <a href="#">Focal adhesion</a>                         | 14          | O=14;E=3.8061;R=3.6783;P=5.70e-5 |
| <a href="#">Oxidative phosphorylation</a>              | 13          | O=13;E=2.2636;R=5.7431;P=1.29e-6 |
| <a href="#">Tight junction</a>                         | 12          | O=12;E=2.2436;R=5.3485;P=6.42e-6 |
| <a href="#">MAPK signaling pathway</a>                 | 12          | O=12;E=5.3285;R=2.252;P=9.39e-3  |
| <a href="#">Insulin signaling pathway</a>              | 11          | O=11;E=2.6042;R=4.2239;P=1.13e-4 |
| <a href="#">Ribosome</a>                               | 10          | O=10;E=1.9231;R=5.1999;P=4.68e-5 |
| <a href="#">Jak-STAT signaling pathway</a>             | 9           | O=9;E=2.8646;R=3.1418;P=3.22e-3  |
| <a href="#">Wnt signaling pathway</a>                  | 9           | O=9;E=2.8646;R=3.1418;P=3.22e-3  |

**OVCA420**

| KEGG pathway                                              | Gene number | Enrichment                       |
|-----------------------------------------------------------|-------------|----------------------------------|
| <a href="#">Regulation of actin cytoskeleton</a>          | 15          | O=15;E=2.4977;R=6.0055;P=8.74e-8 |
| <a href="#">Focal adhesion</a>                            | 14          | O=14;E=2.409;R=5.8115;P=3.42e-7  |
| <a href="#">Insulin signaling pathway</a>                 | 12          | O=12;E=1.6483;R=7.2802;P=2.55e-7 |
| <a href="#">MAPK signaling pathway</a>                    | 9           | O=9;E=3.3726;R=2.6686;P=8.22e-3  |
| <a href="#">Leukocyte transendothelial migration</a>      | 9           | O=9;E=1.42;R=6.338;P=2.28e-5     |
| <a href="#">Natural killer cell mediated cytotoxicity</a> | 9           | O=9;E=1.5088;R=5.965;P=3.56e-5   |
| <a href="#">Gap junction</a>                              | 9           | O=9;E=1.0777;R=8.3511;P=2.89e-6  |
| <a href="#">Wnt signaling pathway</a>                     | 8           | O=8;E=1.8131;R=4.4123;P=6.62e-4  |
| <a href="#">Pancreatic cancer</a>                         | 8           | O=8;E=0.9002;R=8.8869;P=6.78e-6  |
| <a href="#">Cell adhesion molecules (CAMs)</a>            | 7           | O=7;E=1.5722;R=4.4524;P=1.35e-3  |
