# Supplementary material for: Claudin-7 Is Frequently Overexpressed in Ovarian Cancer and Promotes Invasion
Source: PubMed Central journal article supplement (PMC3137611; doi:10.1371/journal.pone.0022119), 2011-07-15
Supplement: pone.0022119.s006.pdf [file pone.0022119.s006.pdf]

**Supp. Table 6: Experimentally proven interactions among differentially regulated genes in our study**

| Interaction Type | Relation            | MedLine Reference | Connectivity | # of References |
|------------------|---------------------|-------------------|--------------|-----------------|
| Expression       | RAF1 ---> HRAS      | 8888693:1124      | 2            | 51              |
| Expression       | SREBF1 --+> PCK2    | 12867535:1191     | 2            | 10              |
| Regulation       | HRAS ---> MAPK3     | 12839994:1194     | 2            | 37              |
| Regulation       | VAV2 --+> Rac1      | 10982832:12       | 2            | 38              |
| MolTransport     | TNF --+> Rac1       | 15242860:12       | 2            | 4               |
| MolTransport     | MAP2K1 ---  TNF     | 10026206:4        | 2            | 8               |
| MolTransport     | PRKCZ --+> MAPK3    | 10614633:7        | 2            | 6               |
| ProtModification | RAF1 --+> MAP2K1    | 9677429:3         | 2            | 661             |
| ProtModification | HRAS ---> RAF1      | 9611107:1238      | 2            | 1               |
| ProtModification | MAP2K1 --+> MAPK3   | 11496823:2        | 2            | 593             |
| ProtModification | RAF1 --+> MAPK3     | 9395450:1214      | 2            | 154             |
| ProtModification | MAPK3 ---> MAP2K1   | 9361191:3         | 2            | 64              |
| ProtModification | MAPK3 --+> RAF1     | 9804618:4         | 2            | 28              |
| ProtModification | RPS6KB1 ---> MAPK3  | 12832467:1179     | 2            | 1               |
| ProtModification | MAPK3 <+> RPS6KB1   | 8001266:1248      | 2            | 1               |
| ProtModification | RAF1 ---  MAPK3     | 10952668:10       | 2            | 64              |
| ProtModification | RAF1 ---> MAP2K1    | 11018021:2        | 2            | 90              |
| ProtModification | MAPK3 --+> SREBF1   | 9712704:3         | 2            | 6               |
| ProtModification | MAP2K1 ---> MAPK3   | 9353338:1021      | 2            | 102             |
| ProtModification | MAPK3 ---> RAF1     | 10807911:5        | 2            | 14              |
| ProtModification | FGFR3 --+> MAPK3    | 9045692:1266      | 2            | 1               |
| ProtModification | RPS6KB1 ---> RPS6   | 8663120:0         | 2            | 105             |
| ProtModification | CSK ---> CAV1       | 11805080:1088     | 2            | 16              |
| ProtModification | PRKCZ --+> RAF1     | 10891480:3        | 2            | 5               |
| ProtModification | RPS6KB1 --+> MAPK3  | 15696050:8        | 2            | 12              |
| ProtModification | MAPK3 ---  RPS6KB1  | 11241670:6        | 2            | 8               |
| ProtModification | FGFR3 ---> MAPK3    | 9045692:1266      | 2            | 2               |
| ProtModification | MAPK3 ---> FOSL1    | 12414630:5        | 2            | 6               |
| ProtModification | MAPK3 ---> SREBF1   | 9712704:3         | 2            | 3               |
| ProtModification | DUSP3 ---> MAPK3    | 7836374:1027      | 2            | 3               |
| ProtModification | DUSP3 ---  MAPK3    | 7836374:1027      | 2            | 3               |
| Binding          | HRAS ---- RAF1      | 15664191          | 2            | 59              |
| Binding          | ITGAV ---- ITGB6    | 8798654           | 2            | 14              |
| Binding          | CAV1 ---- Rac1      | 15263006:7        | 2            | 3               |
| Binding          | Rac1 ---- RPS6KB1   | 11713255:1053     | 2            | 1               |
| Binding          | Actb ---- Rac1      | 11027608:2        | 2            | 1               |
| Binding          | HSPA1A ---- MAP2K1  | 12755708:1263     | 2            | 1               |
| Binding          | CAV1 ---- ITGAV     | 11683383:1142     | 2            | 1               |
| Binding          | GIT1 ---- MAP2K1    | 15923189:1        | 2            | 2               |
| Binding          | CSK ---- GRF2       | 12865333:1238     | 2            | 1               |
| Binding          | GRF2 ---- HRAS      | 10514505:1220     | 2            | 1               |
| Binding          | GIT1 ---- Rac1      | 12686588:1032     | 2            | 1               |
| Binding          | MAPK3 ---- PPP1CA   | 12624094:1152     | 2            | 1               |
| Binding          | CAV1 ---- PPP1CA    | 14645548:1219     | 2            | 7               |
| Binding          | PPP1CA ---- RPS6KB1 | 12036952:1149     | 2            | 1               |
| Binding          | RAF1 ---- RRAS      | 8999998:1         | 2            | 13              |
| Binding          | PPP1CA ---- RAF1    | 12374792:1020     | 2            | 1               |

|                  |                    |               |   |    |
|------------------|--------------------|---------------|---|----|
| Binding          | HSPA8 ---- RAF1    | 12721288:1270 | 2 | 1  |
| Binding          | HSPA1A ---- HSPA8  | 12944486:1    | 2 | 21 |
| Binding          | PPP1CA ---- PYGB   | 9013623:1221  | 2 | 1  |
| Binding          | ARHQ ---- GRF2     | 15581361:0    | 2 | 1  |
| Binding          | BAIAP2 ---- Rac1   | 14506233:1030 | 2 | 2  |
| Binding          | CAV1 ---- MAPK3    | 12969891:1245 | 2 | 1  |
| Binding          | HSPA1A ---- RAF1   | 15625278:3    | 2 | 3  |
| Binding          | CAV1 ---- CSK      | 11805080:1088 | 2 | 3  |
| Binding          | PRKCZ ---- RAF1    | 12551925:1268 | 2 | 1  |
| Binding          | ARHQ ---- PRKCZ    | 3952493:131   | 2 | 2  |
| Binding          | HRAS ---- MAP2K1   | 8822208:1     | 2 | 1  |
| Binding          | PRKCZ ---- RPS6KB1 | 10082559:10   | 2 | 1  |
| Binding          | MAPK3 ---- RPS6KB1 | 15501927:9    | 2 | 1  |
| Binding          | PPP2R2C ---- RAF1  | 4152281:798   | 2 | 6  |
| PromoterBinding  | CAV1 ---- SREBF1   | 15531587:1    | 2 | 7  |
| DirectRegulation | HRAS ---> RAF1     | 12077341:4    | 2 | 47 |
| DirectRegulation | RRAS ---> RAF1     | 8620503:3     | 2 | 9  |
| DirectRegulation | HRAS --+> MAP2K1   | 9397154:4     | 2 | 2  |
| DirectRegulation | HRAS ---  CAV1     | 8621645:1247  | 2 | 9  |
| DirectRegulation | CAV1 ---  HRAS     | 9488658:1040  | 2 | 14 |
| DirectRegulation | CAV1 --+> CAV2     | 14713860:5    | 2 | 17 |
| DirectRegulation | PRKCZ --+> RPS6KB1 | 11980660:8    | 2 | 3  |
| DirectRegulation | HSPA1A ---  RAF1   | 15625278:3    | 2 | 6  |
| DirectRegulation | RAF1 --+> HSPA1A   | 15831476:1    | 2 | 4  |
| DirectRegulation | MAP2K1 ---> HRAS   | 8670897:9     | 2 | 2  |
| DirectRegulation | CSK ---- MAP2K1    | 11964302:1140 | 2 | 2  |
| DirectRegulation | MAP2K1 --+> RAF1   | 9690518:4     | 2 | 46 |
| DirectRegulation | CAV1 ---> CSK      | 15471980:5    | 2 | 5  |
| DirectRegulation | HRAS --+> RAF1     | 9115221:1030  | 2 | 88 |
| DirectRegulation | RAF1 ---  CAV1     | 11953426:1394 | 2 | 2  |
| DirectRegulation | CAV1 ---  MAPK3    | 11948420:10   | 2 | 7  |
| DirectRegulation | CSK ---  HRAS      | 12695509:1245 | 2 | 1  |
| DirectRegulation | MAPK3 ---> CAV1    | 12388423:6    | 2 | 2  |
| DirectRegulation | HSPA5 ---> HSPA1A  | 8200354:2     | 2 | 4  |
| DirectRegulation | RRAS --+> RAF1     | 8999998:1     | 2 | 24 |
| DirectRegulation | RRAS --+> HRAS     | 9852038:1195  | 2 | 7  |
| DirectRegulation | HSPA1A --+> HSPA8  | 10671488:1132 | 2 | 3  |
| DirectRegulation | RRAS2 --+> RAF1    | 10557073:6    | 2 | 10 |
| DirectRegulation | GRF2 --+> ARHQ     | 11309621:6    | 2 | 9  |
| DirectRegulation | PPP1CA ---> RAF1   | 12374792:8    | 2 | 1  |
| DirectRegulation | HSPA8 --+> HSPA1A  | 9148760:2     | 2 | 26 |
| DirectRegulation | GIT1 ---> MAP2K1   | 15923189:1    | 2 | 3  |
| DirectRegulation | RAF1 ---  HRAS     | 10777480:1229 | 2 | 42 |
| DirectRegulation | CAV2 --+> CAV1     | 10373486:1183 | 2 | 17 |
